# Supplementary material for: Induction of New Aromatic Polyketides from the Marine Actinobacterium Streptomyces griseorubiginosus through an OSMAC Approach
Source: MDPI journal article supplement (doi:10.3390/md21100526), 2023-10-03
Supplement: s1 [file s1]

# Supporting Information

## Induction of new aromatic polyketides from the marine actinobacterium *Streptomyces* *griseorubiginosus* through an OSMAC approach.

*Víctor Rodríguez Martín-Aragón*<sup>1</sup>, *Francisco Romero Millán*<sup>1</sup>, *Cristina Cuadrado*<sup>2</sup>, *Antonio Hernández Daranas*<sup>2\*</sup>, *Antonio Fernández Medarde*<sup>1</sup> and *José M. Sánchez López*<sup>1\*</sup>

<sup>1</sup> Biomar Microbial Technologies, Parque Tecnológico de León, Parcela M-10.4, 24009 Armunia, León. Spain

<sup>2</sup> Instituto de Productos Naturales y Agrobiología, Consejo Superior de Investigaciones Científicas (IPNA-CSIC), La Laguna, 38206 Tenerife, Spain

\* Corresponding authors:

adaranas@ipna.csic.es (Antonio Hernández Daranas)

jm.sanchez@biomarmt.com (José M. Sánchez López)

## Table of contents

|                                                                                                                                                  |           |
|--------------------------------------------------------------------------------------------------------------------------------------------------|-----------|
| <b>1. NMR spectra of known compounds 1-18.....</b>                                                                                               | <b>4</b>  |
| Figure S1: <sup>1</sup> H NMR (400 MHz, DMSO- <i>d</i> <sub>6</sub> ) spectrum of compound <b>1</b> .....                                        | 4         |
| Figure S2: <sup>1</sup> H NMR (400 MHz, DMSO- <i>d</i> <sub>6</sub> ) spectrum of compound <b>2</b> .....                                        | 4         |
| Figure S3: <sup>13</sup> C NMR (100 MHz, DMSO- <i>d</i> <sub>6</sub> ) spectrum of compound <b>2</b> .....                                       | 5         |
| Figure S4: <sup>1</sup> H NMR (400 MHz, CDCl <sub>3</sub> ) spectrum of compound <b>3</b> .....                                                  | 5         |
| Figure S5: <sup>13</sup> C NMR (100 MHz, CDCl <sub>3</sub> ) spectrum of compound <b>3</b> .....                                                 | 6         |
| Figure S6: <sup>1</sup> H NMR (400 MHz, CDCl <sub>3</sub> + MeOH- <i>d</i> <sub>4</sub> ) spectrum of compound <b>4</b> .....                    | 6         |
| Figure S7: <sup>13</sup> C NMR (100 MHz, CDCl <sub>3</sub> + MeOH- <i>d</i> <sub>4</sub> ) spectrum of compound <b>4</b> .....                   | 7         |
| Figure S8: <sup>1</sup> H NMR (400 MHz, DMSO- <i>d</i> <sub>6</sub> ) spectrum of compound <b>5</b> .....                                        | 8         |
| Figure S9: <sup>13</sup> C NMR (100 MHz, DMSO- <i>d</i> <sub>6</sub> ) spectrum of compound <b>5</b> .....                                       | 8         |
| Figure S10: <sup>1</sup> H NMR (400 MHz, CDCl <sub>3</sub> + MeOH- <i>d</i> <sub>4</sub> ) spectrum of compound <b>6</b> .....                   | 9         |
| Figure S11: <sup>13</sup> C NMR (100 MHz, CDCl <sub>3</sub> + MeOH- <i>d</i> <sub>4</sub> ) spectrum of compound <b>6</b> .....                  | 9         |
| Figure S12: <sup>1</sup> H NMR (400 MHz, MeOH- <i>d</i> <sub>4</sub> ) spectrum of compound <b>7</b> .....                                       | 10        |
| Figure S13: <sup>13</sup> C NMR (100 MHz, MeOH- <i>d</i> <sub>4</sub> ) spectrum of compound <b>7</b> .....                                      | 10        |
| Figure S14: <sup>1</sup> H NMR (400 MHz, MeOH- <i>d</i> <sub>4</sub> ) spectrum of compound <b>8</b> .....                                       | 11        |
| Figure S15: <sup>13</sup> C NMR (100 MHz, MeOH- <i>d</i> <sub>4</sub> ) spectrum of compound <b>8</b> .....                                      | 11        |
| Figure S16: <sup>1</sup> H NMR (400 MHz, CDCl <sub>3</sub> + MeOH- <i>d</i> <sub>4</sub> ) spectrum of compound <b>9</b> .....                   | 12        |
| Figure S17: <sup>13</sup> C NMR (100 MHz, CDCl <sub>3</sub> + MeOH- <i>d</i> <sub>4</sub> ) spectrum of compound <b>9</b> .....                  | 12        |
| Figure S18: <sup>1</sup> H NMR (400 MHz, CDCl <sub>3</sub> + MeOH- <i>d</i> <sub>4</sub> ) spectrum of compound <b>10</b> .....                  | 13        |
| Figure S19: <sup>13</sup> C NMR (100 MHz, CDCl <sub>3</sub> + MeOH- <i>d</i> <sub>4</sub> ) spectrum of compound <b>10</b> .....                 | 13        |
| Figure S20: <sup>1</sup> H NMR (400 MHz, CDCl <sub>3</sub> ) spectrum of compound <b>11</b> .....                                                | 14        |
| Figure S21: <sup>13</sup> C NMR (100 MHz, CDCl <sub>3</sub> ) spectrum of compound <b>11</b> .....                                               | 14        |
| Figure S22: <sup>1</sup> H NMR (400 MHz, CDCl <sub>3</sub> ) spectrum of compound <b>12</b> .....                                                | 15        |
| Figure S23: <sup>13</sup> C NMR (100 MHz, CDCl <sub>3</sub> ) spectrum of compound <b>12</b> .....                                               | 15        |
| Figure S24: <sup>1</sup> H NMR (400 MHz, CDCl <sub>3</sub> ) spectrum of compound <b>13</b> .....                                                | 16        |
| Figure S25: <sup>13</sup> C NMR (100 MHz, CDCl <sub>3</sub> ) spectrum of compound <b>13</b> .....                                               | 16        |
| Figure S26: <sup>1</sup> H NMR (400 MHz, MeOH- <i>d</i> <sub>4</sub> ) spectrum of compound <b>14</b> .....                                      | 17        |
| Figure S27: <sup>13</sup> C NMR (100 MHz, MeOH- <i>d</i> <sub>4</sub> ) spectrum of compound <b>14</b> .....                                     | 17        |
| Figure S28: <sup>1</sup> H NMR (400 MHz, MeOH- <i>d</i> <sub>4</sub> ) spectrum of compound <b>15</b> .....                                      | 18        |
| Figure S29: <sup>13</sup> C NMR (100 MHz, MeOH- <i>d</i> <sub>4</sub> ) spectrum of compound <b>15</b> .....                                     | 18        |
| Figure S30: <sup>1</sup> H NMR (400 MHz, MeOH- <i>d</i> <sub>4</sub> ) spectrum of compound <b>16</b> .....                                      | 19        |
| Figure S31: <sup>13</sup> C NMR (100 MHz, MeOH- <i>d</i> <sub>4</sub> ) spectrum of compound <b>16</b> .....                                     | 19        |
| Figure S32: <sup>1</sup> H NMR (400 MHz, MeOH- <i>d</i> <sub>4</sub> ) spectrum of compound <b>17</b> .....                                      | 20        |
| Figure S33: <sup>13</sup> C NMR (100 MHz, MeOH- <i>d</i> <sub>4</sub> ) spectrum of compound <b>17</b> .....                                     | 20        |
| Figure S34: <sup>1</sup> H NMR (400 MHz, CDCl <sub>3</sub> ) spectrum of compound <b>18</b> .....                                                | 21        |
| Figure S35: <sup>13</sup> C NMR (100 MHz, CDCl <sub>3</sub> ) spectrum of compound <b>18</b> .....                                               | 21        |
| <b>2. Experimental spectra of novel compounds 19-23 .....</b>                                                                                    | <b>22</b> |
| Figure S36: HRESIMS spectrum of compound <b>19</b> .....                                                                                         | 22        |
| Figure S37: UV absorption spectrum of compound <b>19</b> .....                                                                                   | 23        |
| Figure S38: IR spectrum of compound <b>19</b> .....                                                                                              | 23        |
| Figure S39: <sup>1</sup> H NMR (400 MHz, CDCl <sub>3</sub> + MeOH- <i>d</i> <sub>4</sub> ) spectrum of compound <b>19</b> .....                  | 23        |
| Figure S40: <sup>1</sup> H- <sup>1</sup> H COSY (400 MHz, CDCl <sub>3</sub> + MeOH- <i>d</i> <sub>4</sub> ) spectrum of compound <b>19</b> ..... | 24        |
| Figure S41: gHSQC (400 MHz and 100MHz, CDCl <sub>3</sub> + MeOH- <i>d</i> <sub>4</sub> ) spectrum of compound <b>19</b> .....                    | 25        |
| Figure S42: gHMBC (400 MHz and 100MHz, CDCl <sub>3</sub> + MeOH- <i>d</i> <sub>4</sub> ) spectrum of compound <b>19</b> .....                    | 25        |
| Figure S43: HRESIMS spectrum of compound <b>20</b> .....                                                                                         | 26        |
| Figure S44: UV absorption spectrum of compound <b>20</b> .....                                                                                   | 26        |
| Figure S45: IR spectrum of compound <b>20</b> .....                                                                                              | 26        |
| Figure S46: <sup>1</sup> H NMR (400 MHz, MeOH- <i>d</i> <sub>4</sub> ) spectrum of compound <b>20</b> .....                                      | 27        |
| Figure S47: <sup>13</sup> C NMR (100 MHz, MeOH- <i>d</i> <sub>4</sub> ) spectrum of compound <b>20</b> .....                                     | 27        |
| Figure S48: <sup>1</sup> H- <sup>1</sup> H COSY (400 MHz, MeOH- <i>d</i> <sub>4</sub> ) spectrum of compound <b>20</b> .....                     | 28        |
| Figure S49a: gHSQC (400 MHz and 100MHz, MeOH- <i>d</i> <sub>4</sub> ) spectrum of compound <b>20</b> .....                                       | 28        |
| Figure S49b: gHSQC (400 MHz and 100MHz, MeOH- <i>d</i> <sub>4</sub> ) spectrum of compound <b>20</b> .....                                       | 29        |
| Figure S50a: gHMBC (400 MHz and 100MHz, MeOH- <i>d</i> <sub>4</sub> ) spectrum of compound <b>20</b> .....                                       | 29        |
| Figure S50b: gHMBC (400 MHz and 100MHz, MeOH- <i>d</i> <sub>4</sub> ) spectrum of compound <b>20</b> .....                                       | 30        |

|                                                                                                                                 |           |
|---------------------------------------------------------------------------------------------------------------------------------|-----------|
| Figure S51: HRESIMS spectrum of compound <b>21</b> .....                                                                        | 31        |
| Figure S52: UV absorption spectrum of compound <b>21</b> .....                                                                  | 31        |
| Figure S53: IR spectrum of compound <b>21</b> .....                                                                             | 31        |
| Figure S54: $^1\text{H}$ NMR (400 MHz, $\text{CDCl}_3$ ) spectrum of compound <b>21</b> .....                                   | 32        |
| Figure S55: $^{13}\text{C}$ NMR (100 MHz, $\text{CDCl}_3$ ) spectrum of compound <b>21</b> .....                                | 32        |
| Figure S56: $^1\text{H}$ - $^1\text{H}$ COSY (400 MHz, $\text{CDCl}_3$ ) spectrum of compound <b>21</b> .....                   | 33        |
| Figure S57a: gHSQC (400 MHz and 100MHz, $\text{CDCl}_3$ ) spectrum of compound <b>21</b> .....                                  | 33        |
| Figure S57b: gHSQC (400 MHz and 100MHz, $\text{CDCl}_3$ ) spectrum of compound <b>21</b> .....                                  | 34        |
| Figure S58a: gHMBC (400 MHz and 100MHz, $\text{CDCl}_3$ ) spectrum of compound <b>21</b> .....                                  | 34        |
| Figure S58b: gHMBC (400 MHz and 100MHz, $\text{CDCl}_3$ ) spectrum of compound <b>21</b> .....                                  | 35        |
| Figure S58c: gHMBC (400 MHz and 100MHz, $\text{CDCl}_3$ ) spectrum of compound <b>21</b> .....                                  | 35        |
| Figure S59: HRESIMS spectrum of compound <b>22</b> .....                                                                        | 36        |
| Figure S60: UV absorption spectrum of compound <b>22</b> .....                                                                  | 36        |
| Figure S61: IR spectrum of compound <b>22</b> .....                                                                             | 36        |
| Figure S62: $^1\text{H}$ NMR (400 MHz, $\text{CDCl}_3$ ) spectrum of compound <b>22</b> .....                                   | 37        |
| Figure S63: $^1\text{H}$ - $^1\text{H}$ COSY (400 MHz, $\text{CDCl}_3$ ) spectrum of compound <b>22</b> .....                   | 37        |
| Figure S64a: gHMBC (400 MHz and 100MHz, $\text{CDCl}_3$ ) spectrum of compound <b>22</b> .....                                  | 37        |
| Figure S64b: gHMBC (400 MHz and 100MHz, $\text{CDCl}_3$ ) spectrum of compound <b>22</b> .....                                  | 38        |
| Figure S65: HRESIMS spectrum of compound <b>23</b> .....                                                                        | 39        |
| Figure S66: UV absorption spectrum of compound <b>23</b> .....                                                                  | 39        |
| Figure S67: IR spectrum of compound <b>23</b> .....                                                                             | 39        |
| Figure S68: $^1\text{H}$ NMR (400 MHz, $\text{CDCl}_3 + \text{MeOH-}d_4$ ) spectrum of compound <b>23</b> .....                 | 40        |
| Figure S69: $^{13}\text{C}$ NMR (100 MHz, $\text{CDCl}_3 + \text{MeOH-}d_4$ ) spectrum of compound <b>23</b> .....              | 40        |
| Figure S70: $^1\text{H}$ - $^1\text{H}$ COSY (400 MHz, $\text{CDCl}_3 + \text{MeOH-}d_4$ ) spectrum of compound <b>23</b> ..... | 41        |
| Figure S71: gHSQC (400 MHz and 100MHz, $\text{CDCl}_3 + \text{MeOH-}d_4$ ) spectrum of compound <b>23</b> .....                 | 41        |
| Figure S72: gHMBC (400 MHz and 100MHz, $\text{CDCl}_3 + \text{MeOH-}d_4$ ) spectrum of compound <b>23</b> .....                 | 42        |
| <b>3. Computational section</b> .....                                                                                           | <b>43</b> |
| <b>3.1. Computational details</b> .....                                                                                         | <b>43</b> |
| <b>3.2. Isomer studied for compound 23.</b> .....                                                                               | <b>44</b> |
| <b>3.3. Experimental chemical shifts and isotropic magnetic shielding constants of studied isomers.</b> .....                   | <b>44</b> |
| <b>3.4. Mix-J-DP4 results</b> .....                                                                                             | <b>47</b> |
| <b>3.5. CMAE for <math>^1\text{H}</math> and <math>^{13}\text{C}</math> for the isomers of compounds 23.</b> .....              | <b>48</b> |
| <b>3.6. Correlation plots of compound 23.</b> .....                                                                             | <b>50</b> |
| <b>3.7. SCF energies of compound 23.</b> .....                                                                                  | <b>52</b> |
| <b>3.8. Cartesian coordinates of conformers for compound 23.</b> .....                                                          | <b>54</b> |
| <b>4. Electronic Circular Dichroism</b> .....                                                                                   | <b>59</b> |
| <b>4.1. Computational details</b> .....                                                                                         | <b>59</b> |

## 1. NMR spectra of known compounds 1-18

Figure S1:  $^1\text{H}$  NMR (400 MHz,  $\text{DMSO}-d_6$ ) spectrum of compound **1**

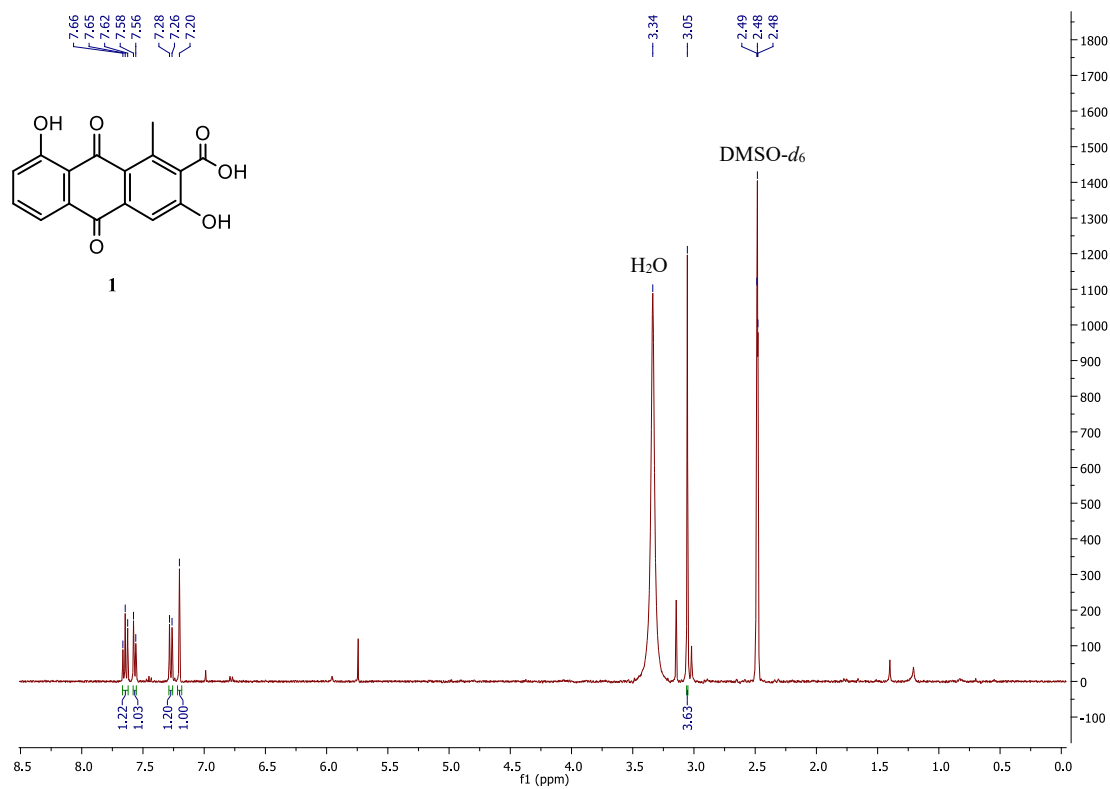

Figure S2:  $^1\text{H}$  NMR (400 MHz,  $\text{DMSO}-d_6$ ) spectrum of compound **2**



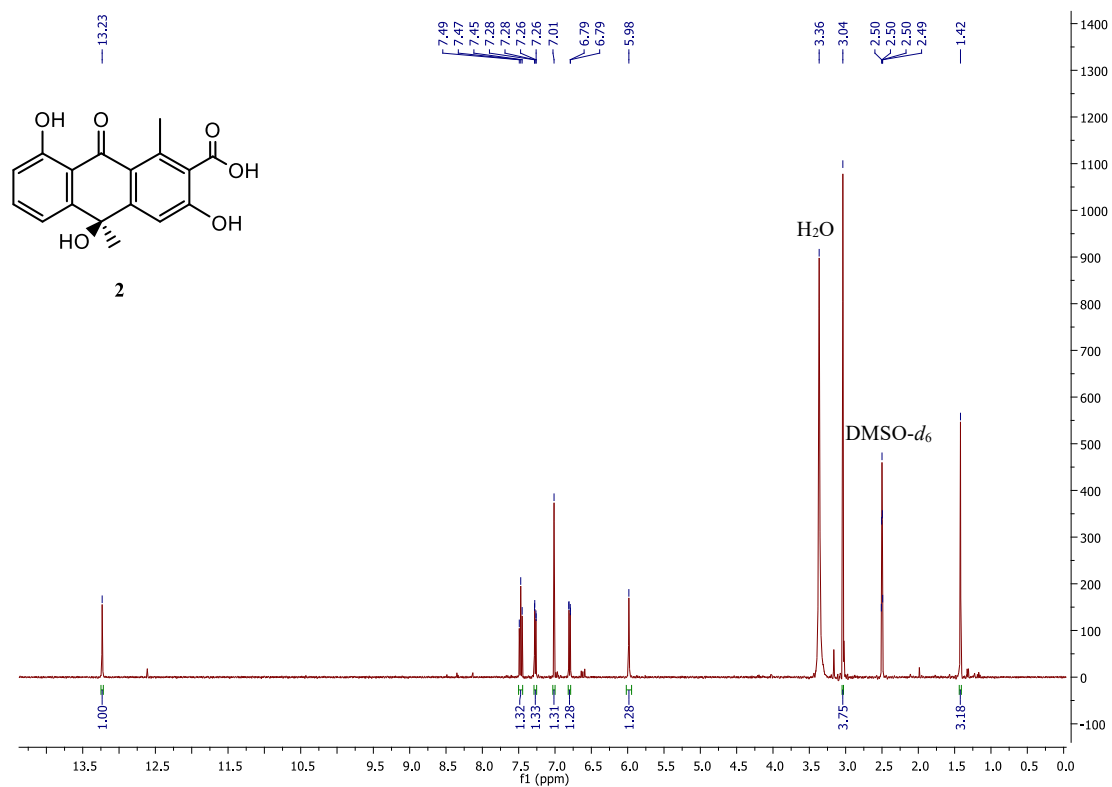

Figure S3: <sup>13</sup>C NMR (100 MHz, DMSO-*d*<sub>6</sub>) spectrum of compound 2

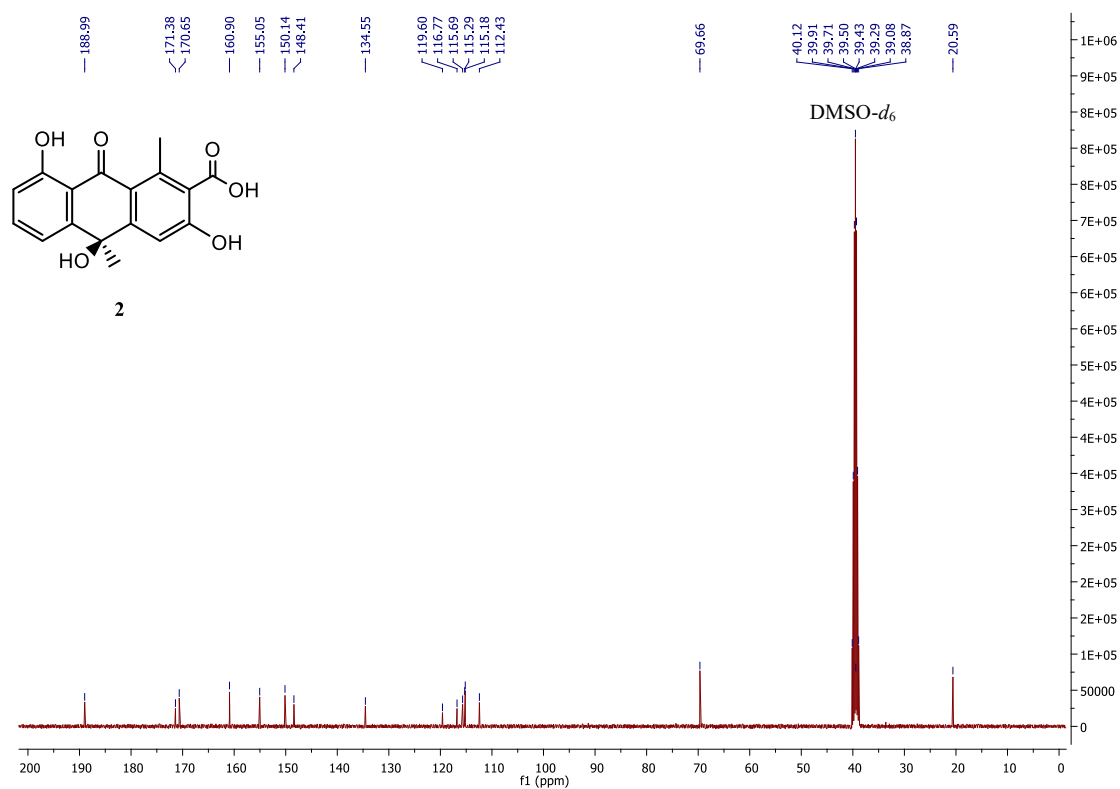

Figure S4: <sup>1</sup>H NMR (400 MHz, CDCl<sub>3</sub>) spectrum of compound 3

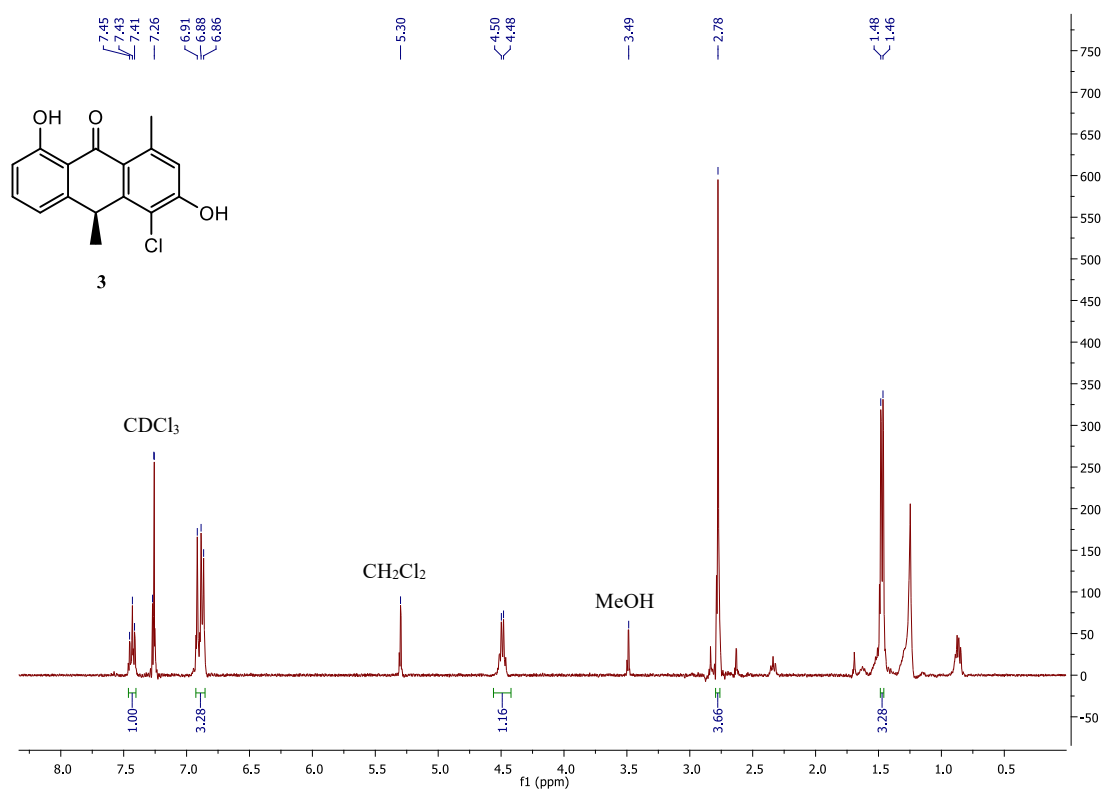

Figure S5: <sup>13</sup>C NMR (100 MHz, CDCl<sub>3</sub>) spectrum of compound **3**

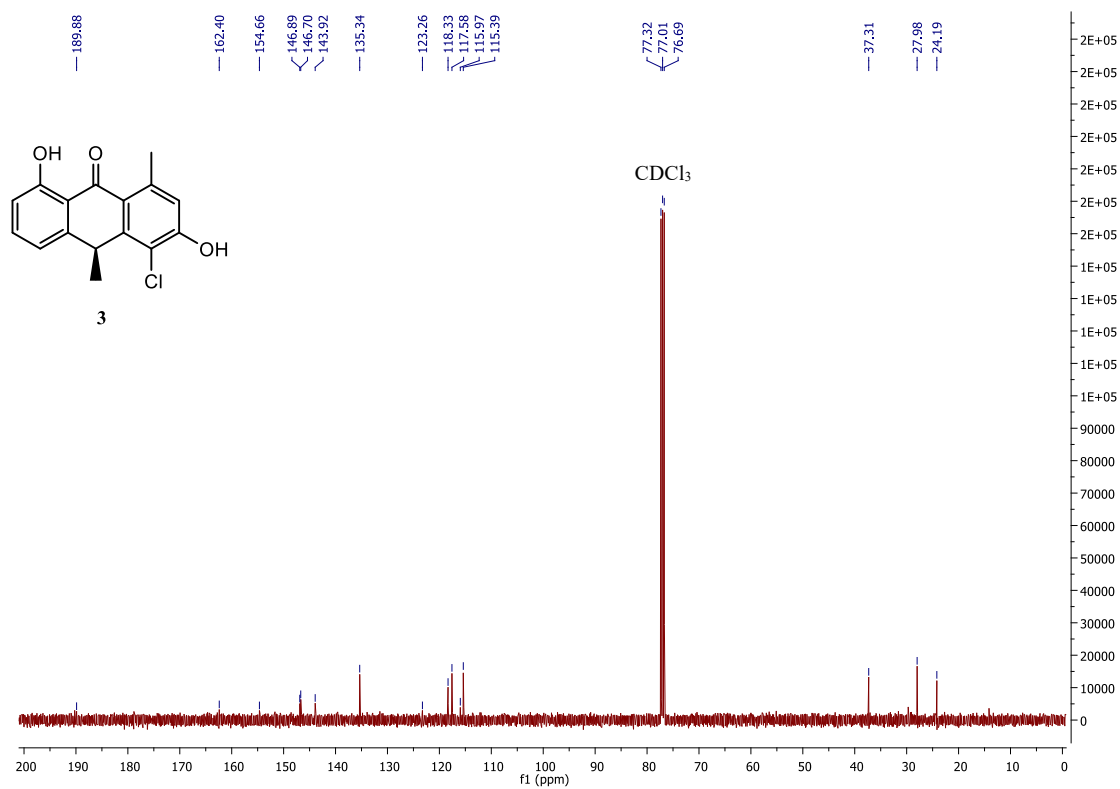

Figure S6: <sup>1</sup>H NMR (400 MHz, CDCl<sub>3</sub> + MeOH-*d*<sub>4</sub>) spectrum of compound **4**

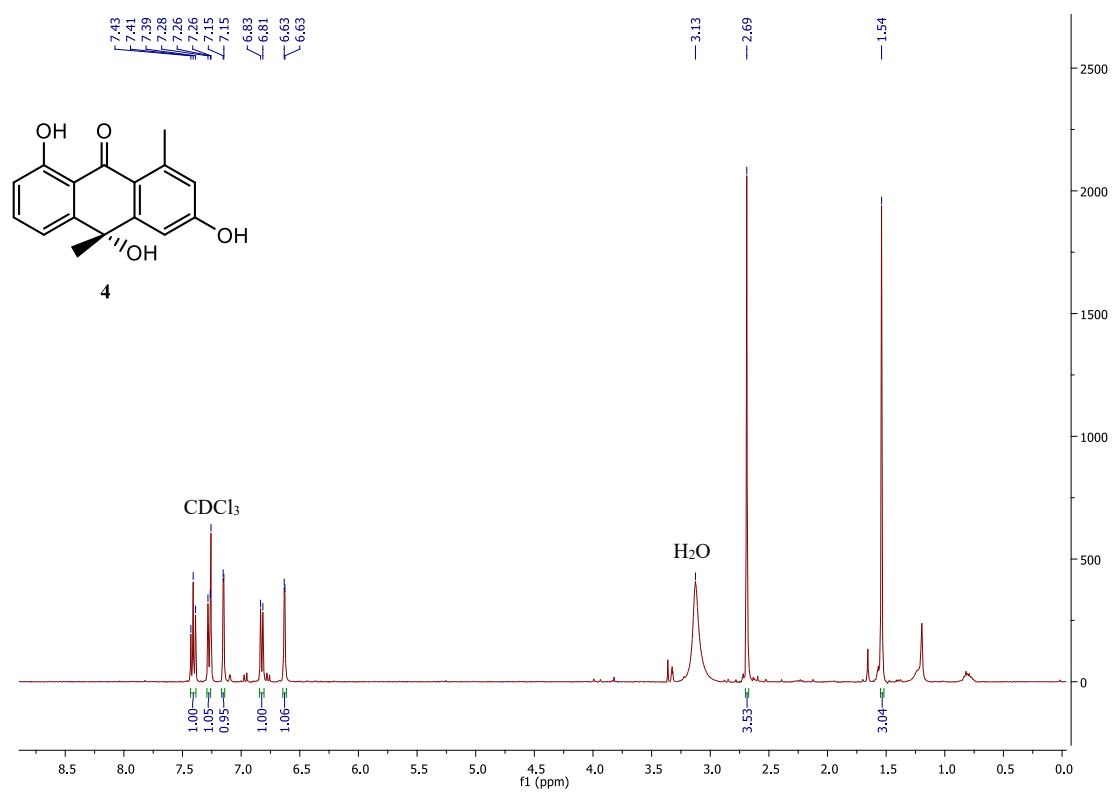

Figure S7: <sup>13</sup>C NMR (100 MHz, CDCl<sub>3</sub> + MeOH-*d*<sub>4</sub>) spectrum of compound **4**

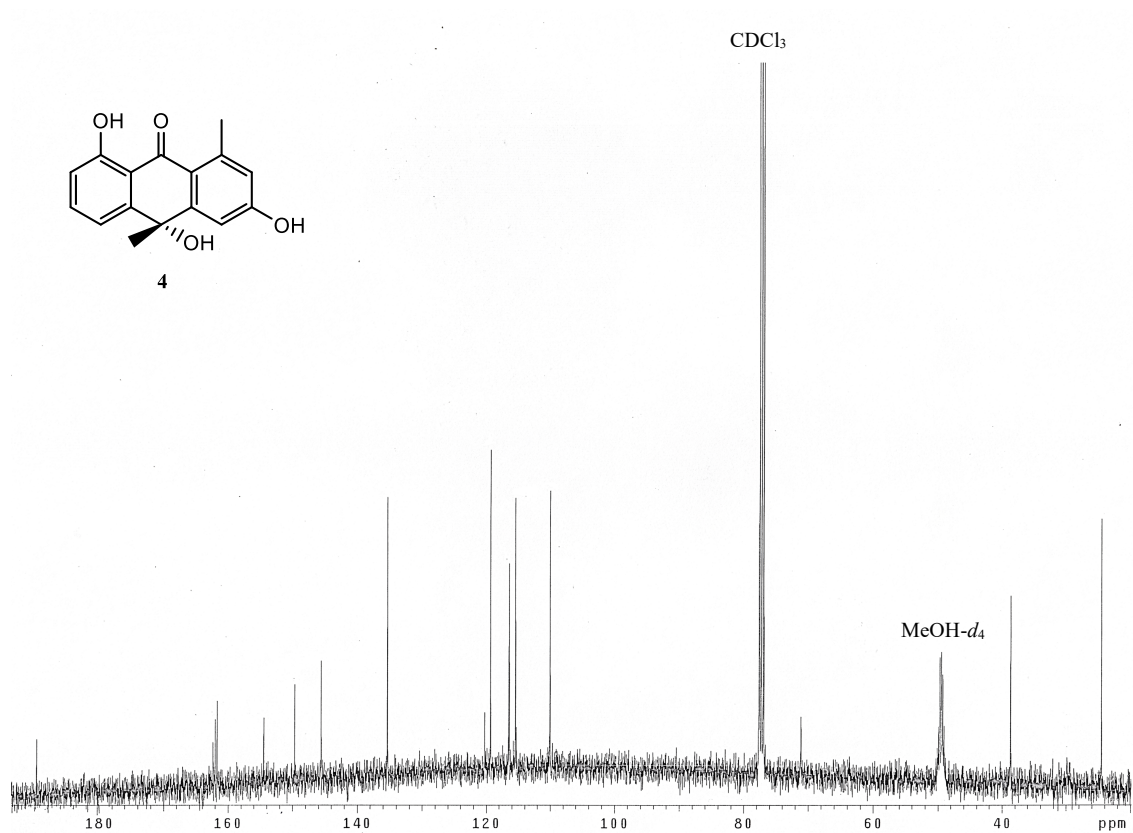

Figure S8:  $^1\text{H}$  NMR (400 MHz,  $\text{DMSO-}d_6$ ) spectrum of compound **5**

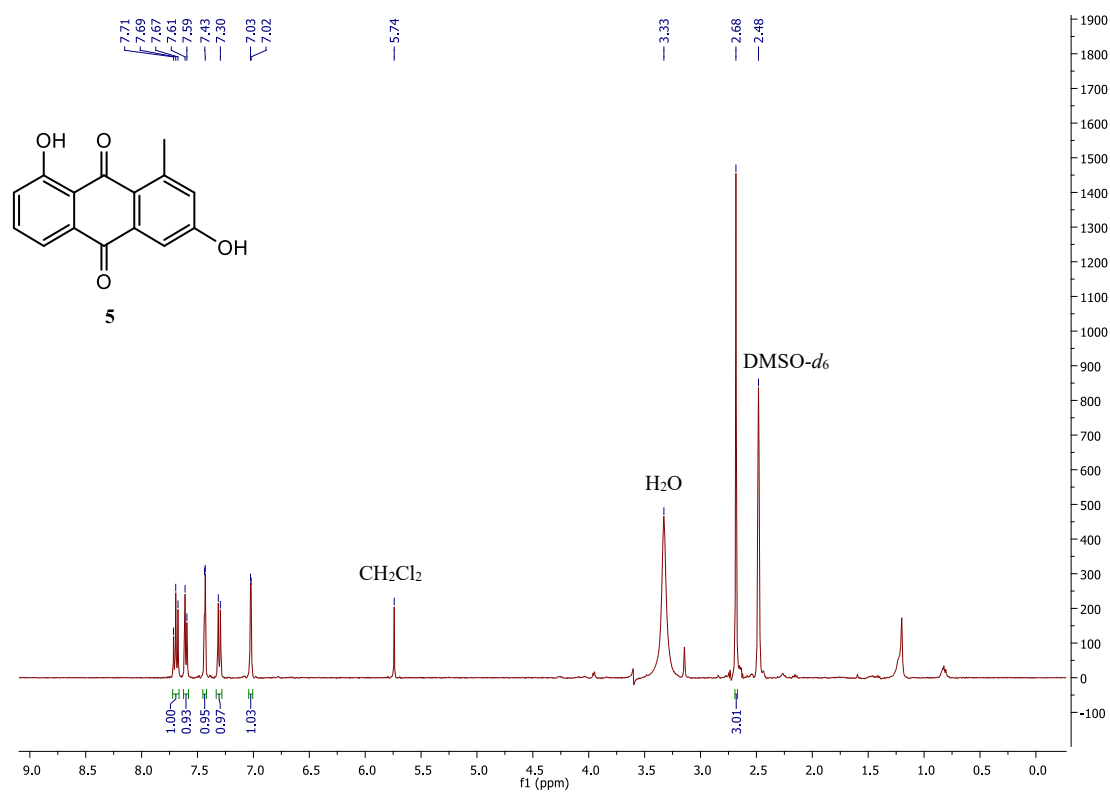

Figure S9:  $^{13}\text{C}$  NMR (100 MHz,  $\text{DMSO-}d_6$ ) spectrum of compound **5**

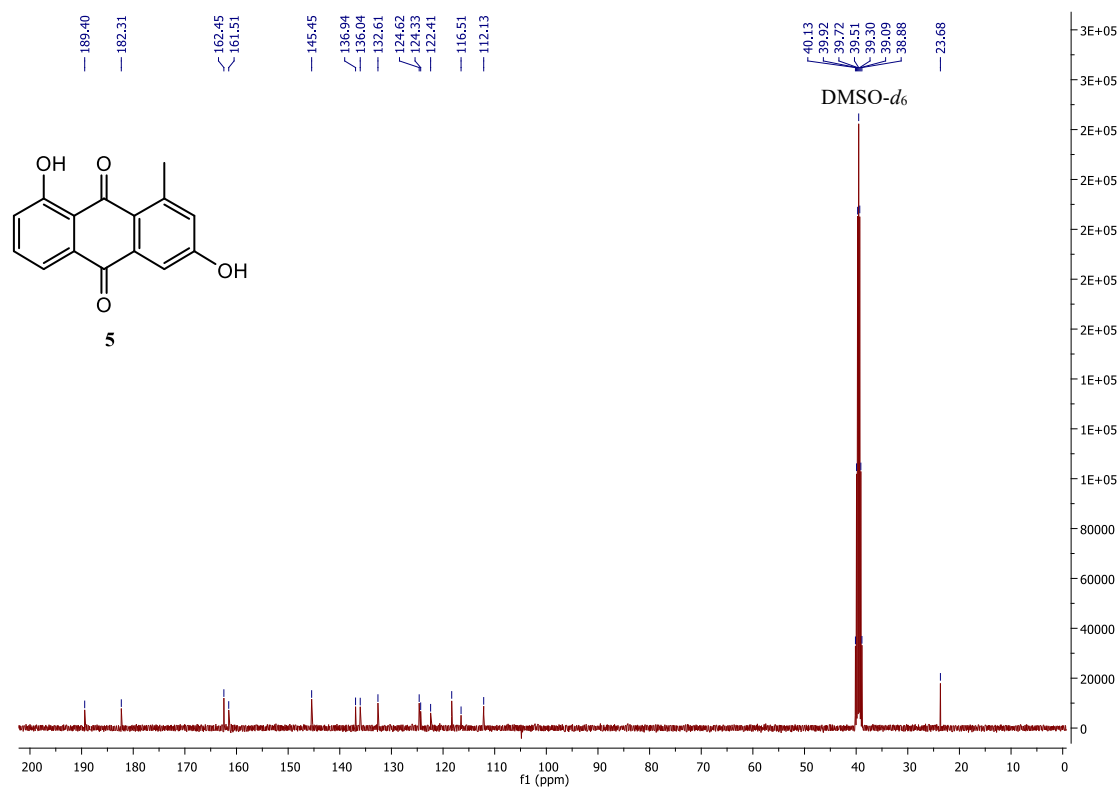

Figure S10:  $^1\text{H}$  NMR (400 MHz,  $\text{CDCl}_3 + \text{MeOH-}d_4$ ) spectrum of compound **6**

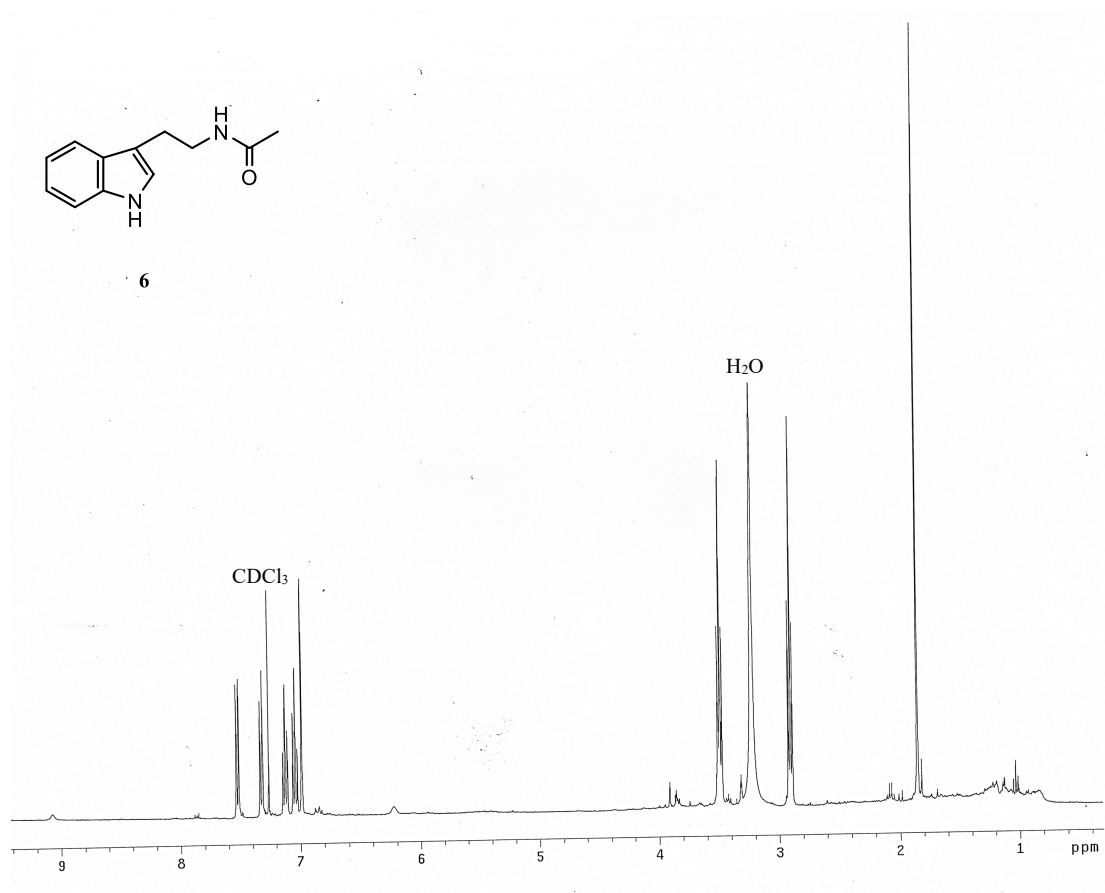

Figure S11:  $^{13}\text{C}$  NMR (100 MHz,  $\text{CDCl}_3 + \text{MeOH-}d_4$ ) spectrum of compound **6**

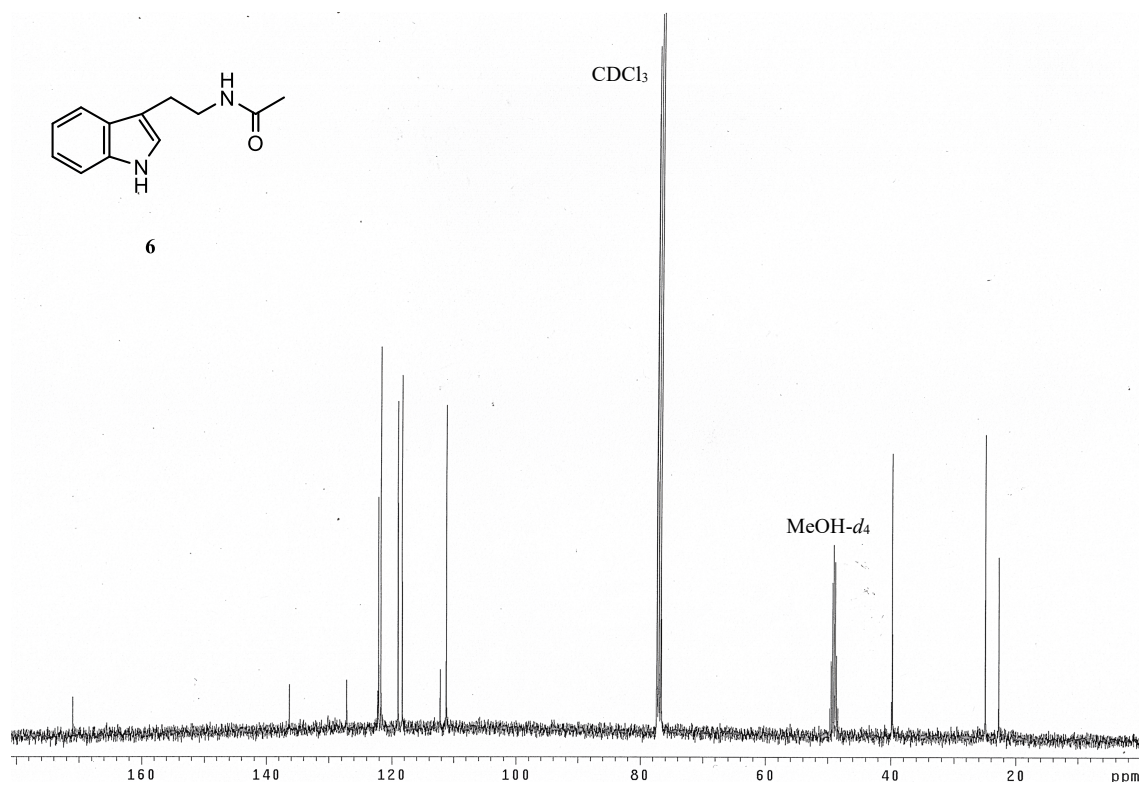

Figure S12:  $^1\text{H}$  NMR (400 MHz,  $\text{MeOH-}d_4$ ) spectrum of compound **7**

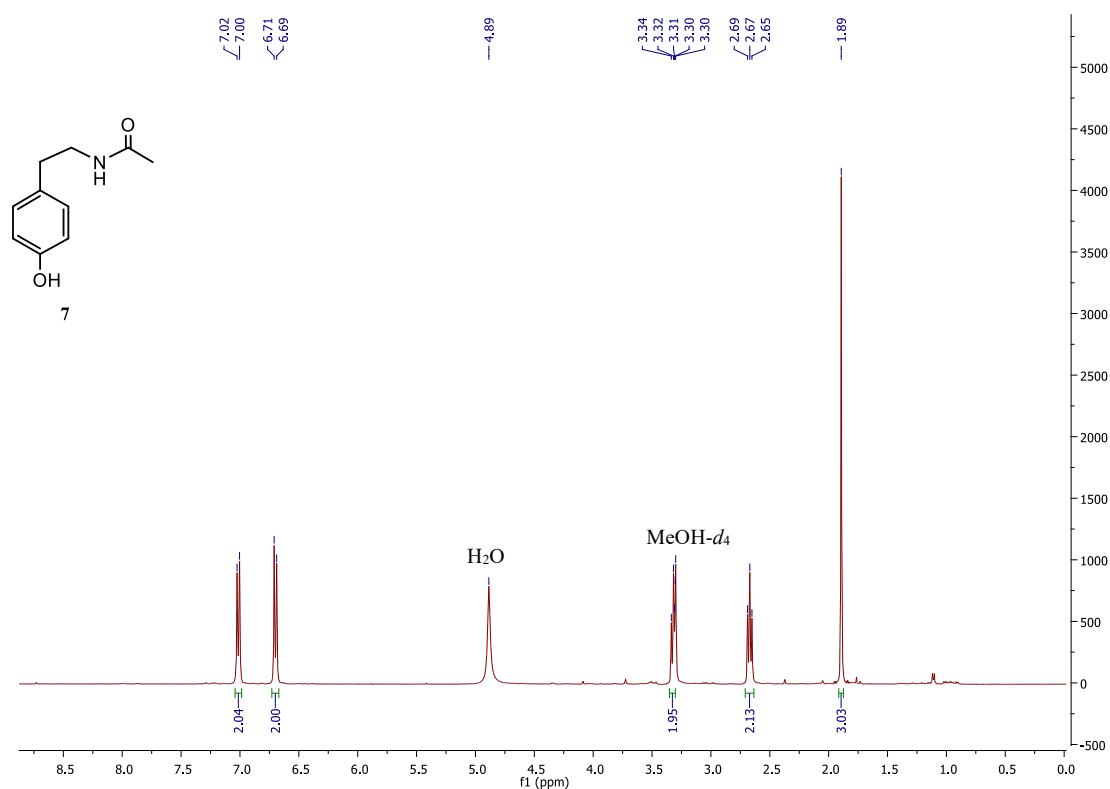

Figure S13:  $^{13}\text{C}$  NMR (100 MHz,  $\text{MeOH-}d_4$ ) spectrum of compound **7**

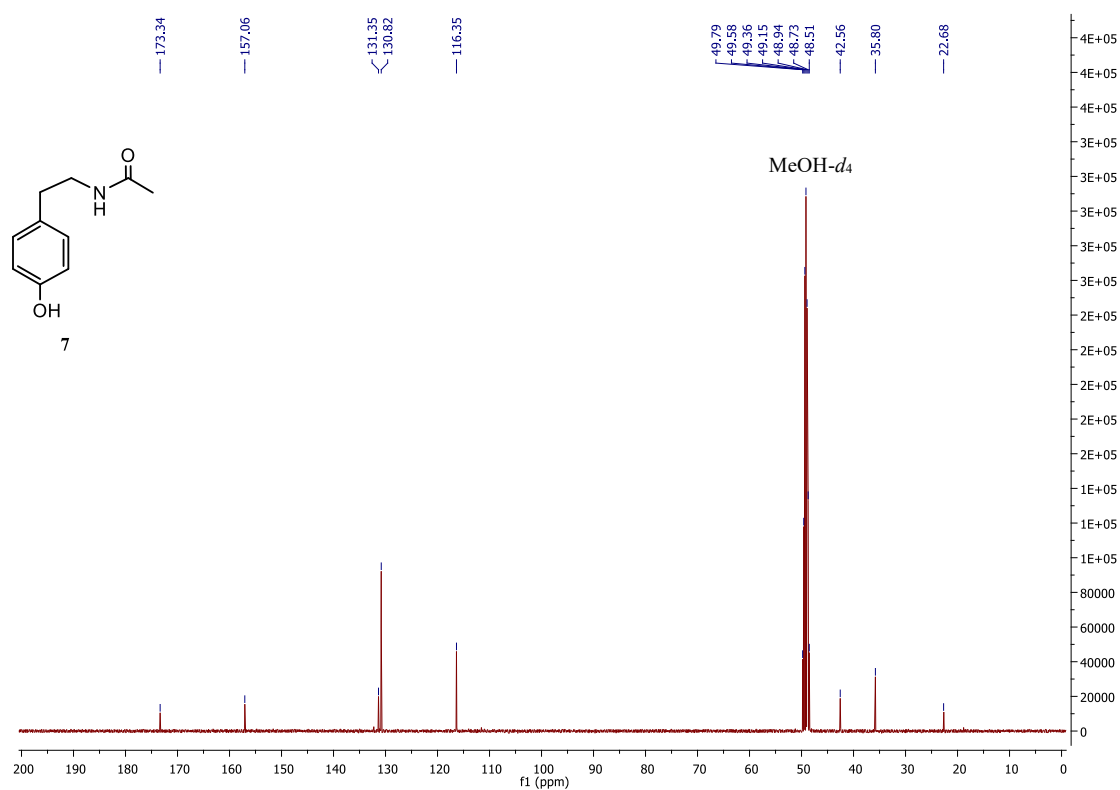

Figure S14:  $^1\text{H}$  NMR (400 MHz,  $\text{MeOH-}d_4$ ) spectrum of compound **8**

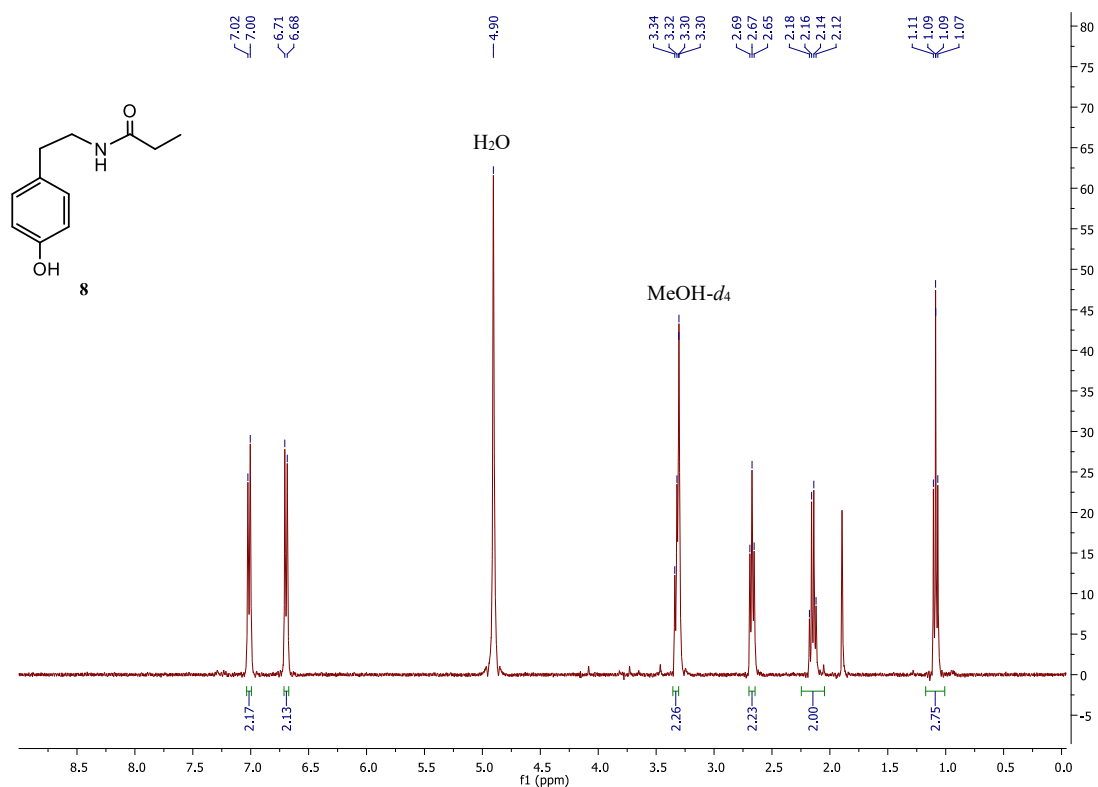

Figure S15:  $^{13}\text{C}$  NMR (100 MHz,  $\text{MeOH-}d_4$ ) spectrum of compound **8**

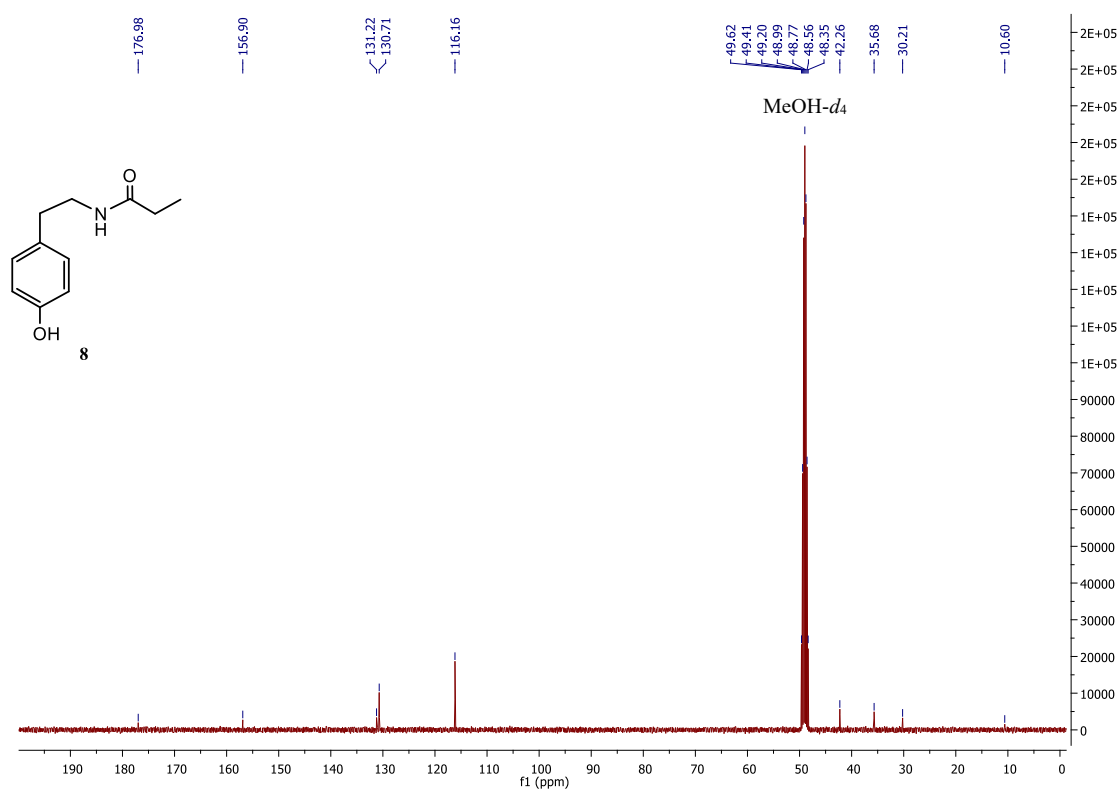



Figure S16:  $^1\text{H}$  NMR (400 MHz,  $\text{CDCl}_3 + \text{MeOH-}d_4$ ) spectrum of compound **9**

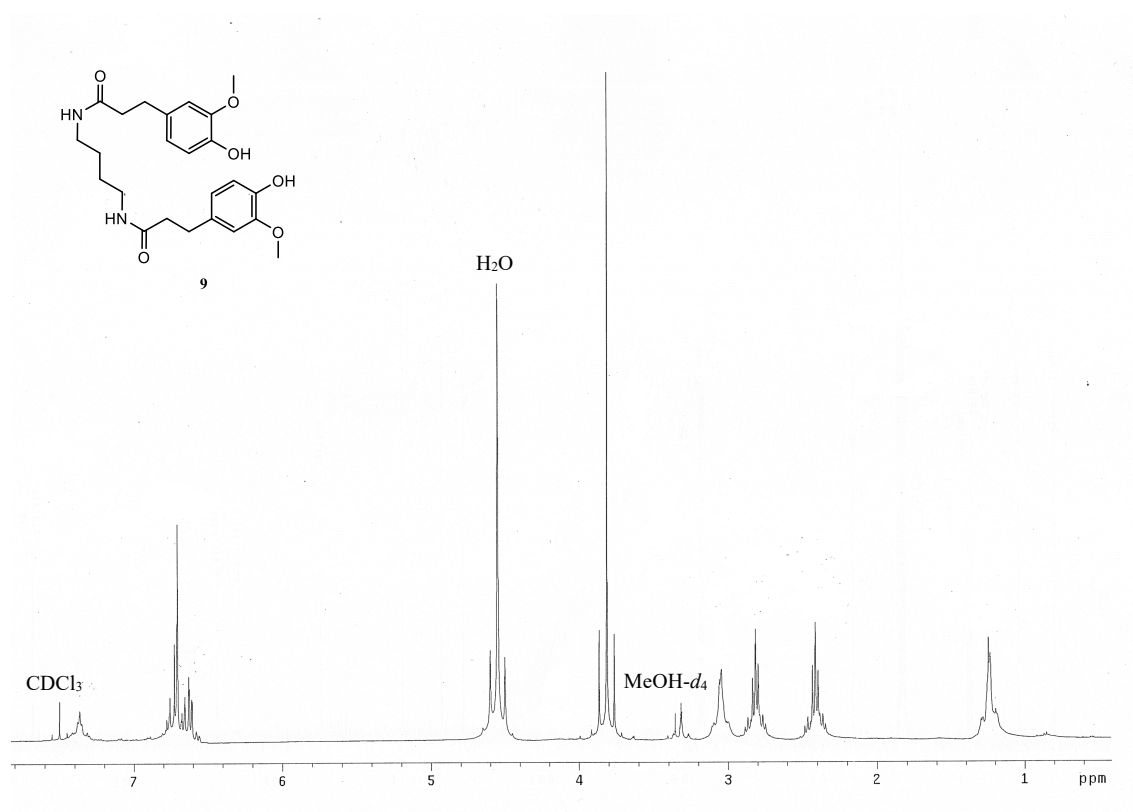

Figure S17:  $^{13}\text{C}$  NMR (100 MHz,  $\text{CDCl}_3 + \text{MeOH-}d_4$ ) spectrum of compound **9**

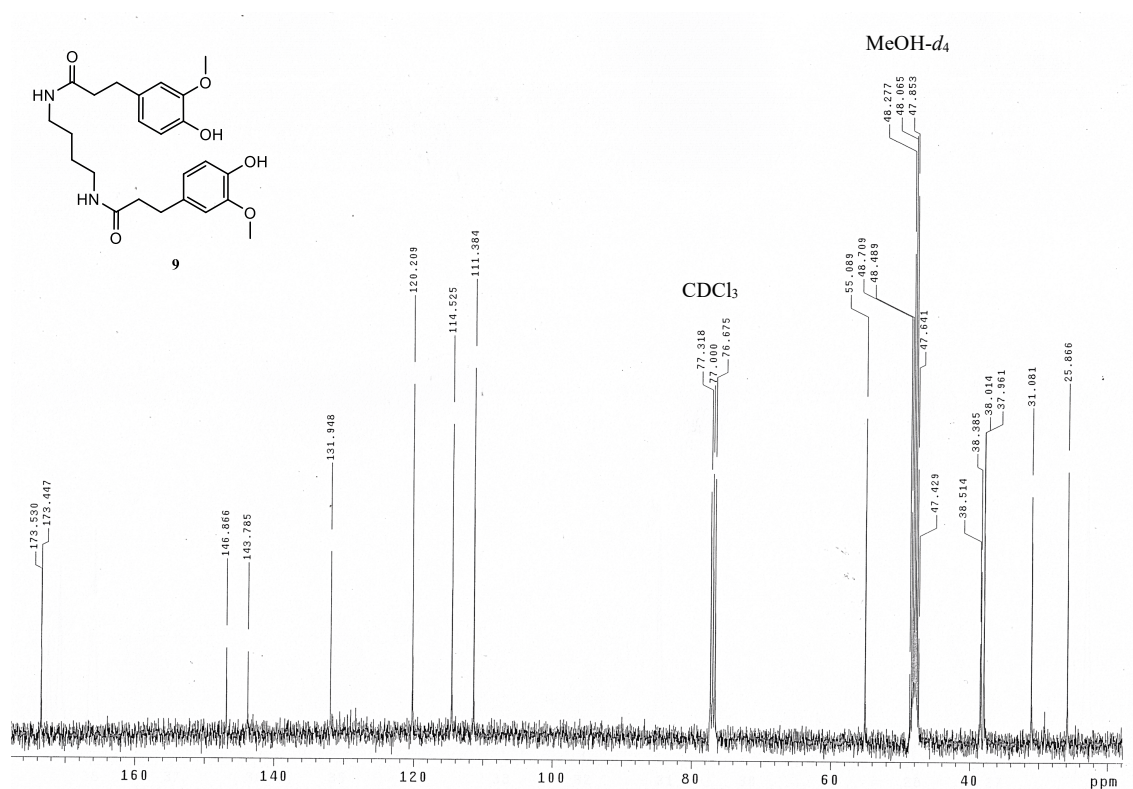



Figure S18:  $^1\text{H}$  NMR (400 MHz,  $\text{CDCl}_3 + \text{MeOH-}d_4$ ) spectrum of compound **10**

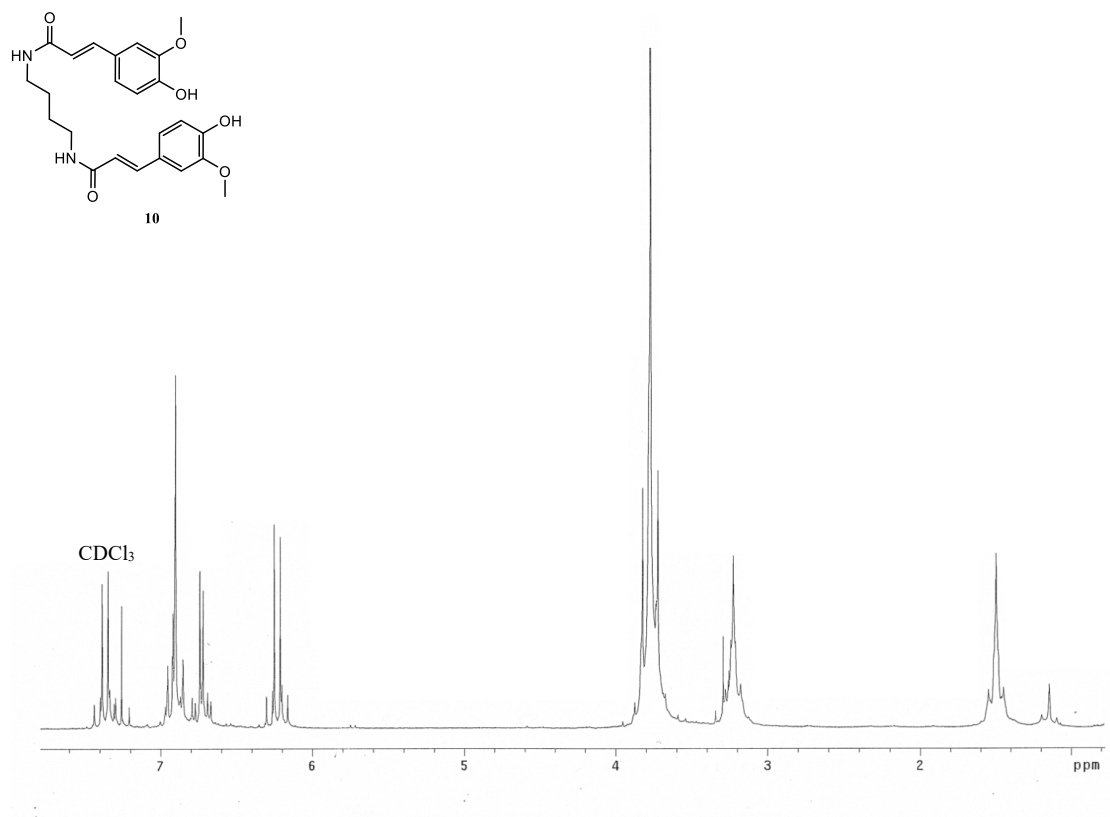

Figure S19:  $^{13}\text{C}$  NMR (100 MHz,  $\text{CDCl}_3 + \text{MeOH-}d_4$ ) spectrum of compound **10**

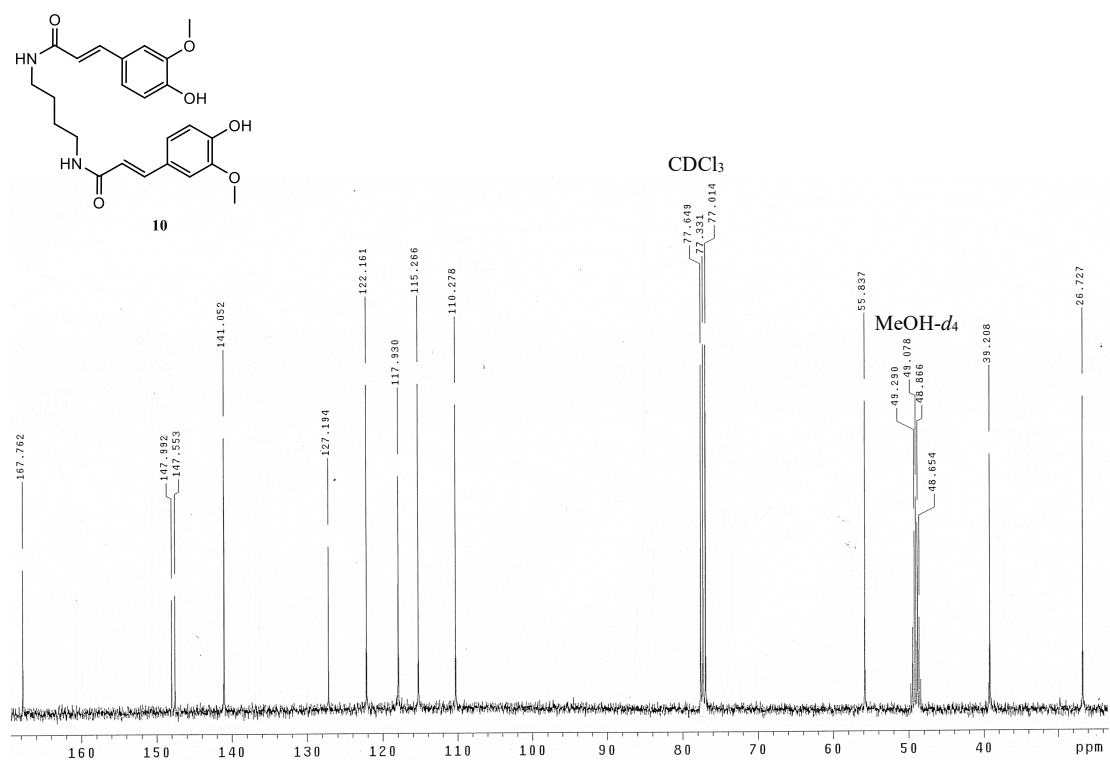

Figure S20:  $^1\text{H}$  NMR (400 MHz,  $\text{CDCl}_3$ ) spectrum of compound **11**

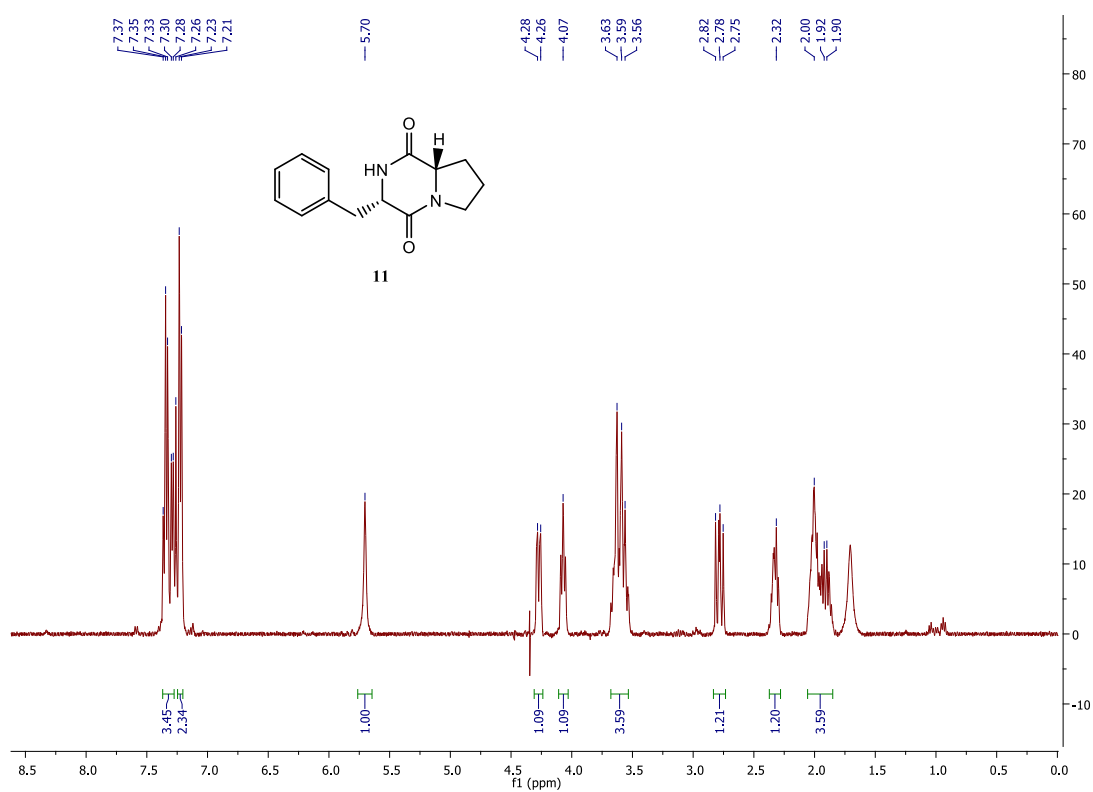

Figure S21:  $^{13}\text{C}$  NMR (100 MHz,  $\text{CDCl}_3$ ) spectrum of compound **11**

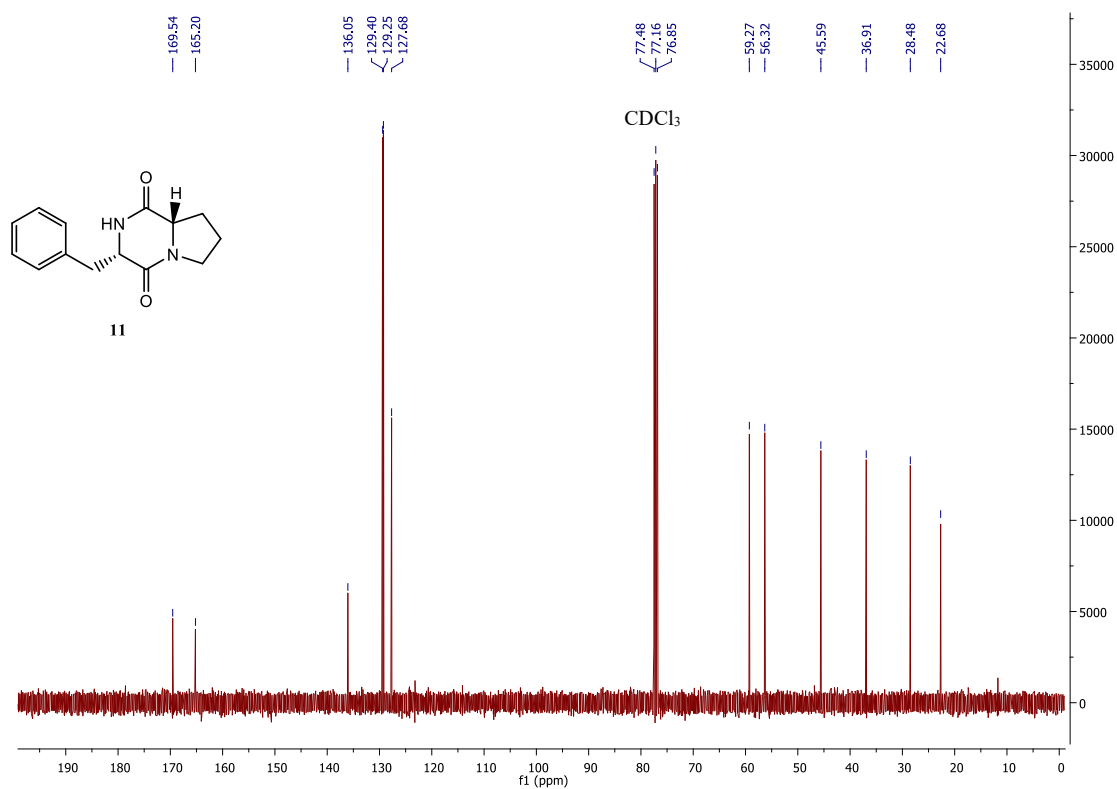

Figure S22:  $^1\text{H}$  NMR (400 MHz,  $\text{CDCl}_3$ ) spectrum of compound **12**

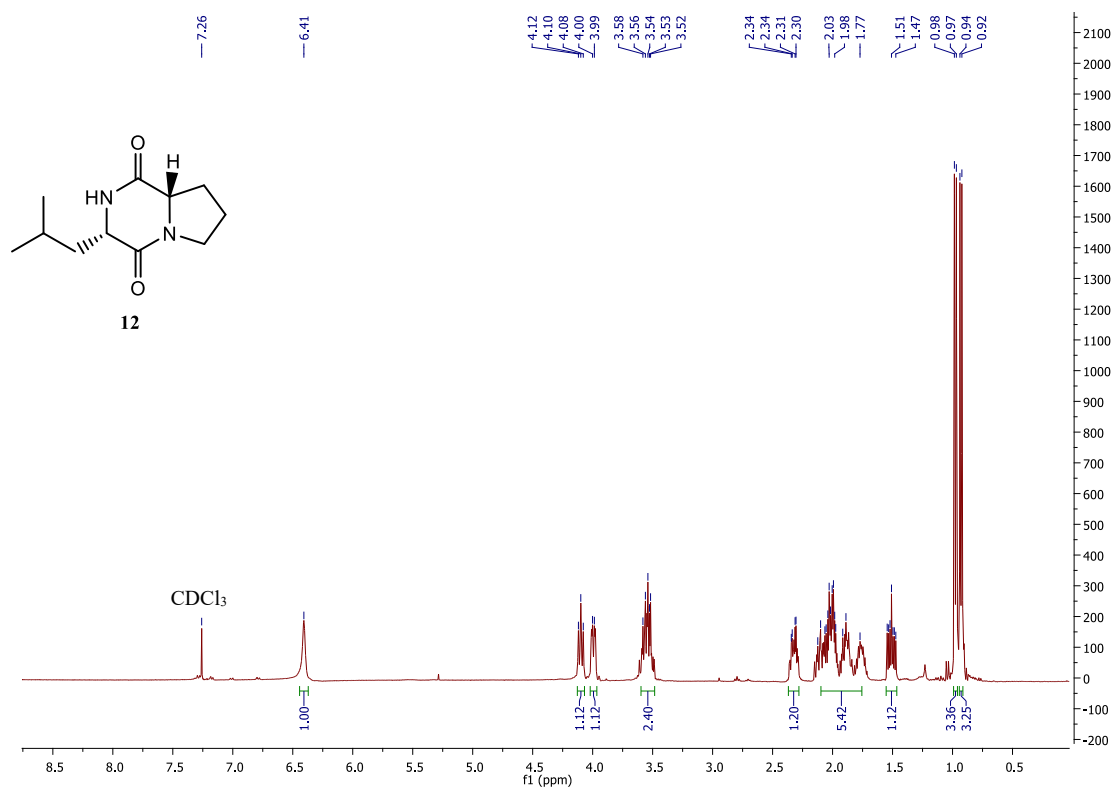

Figure S23:  $^{13}\text{C}$  NMR (100 MHz,  $\text{CDCl}_3$ ) spectrum of compound **12**

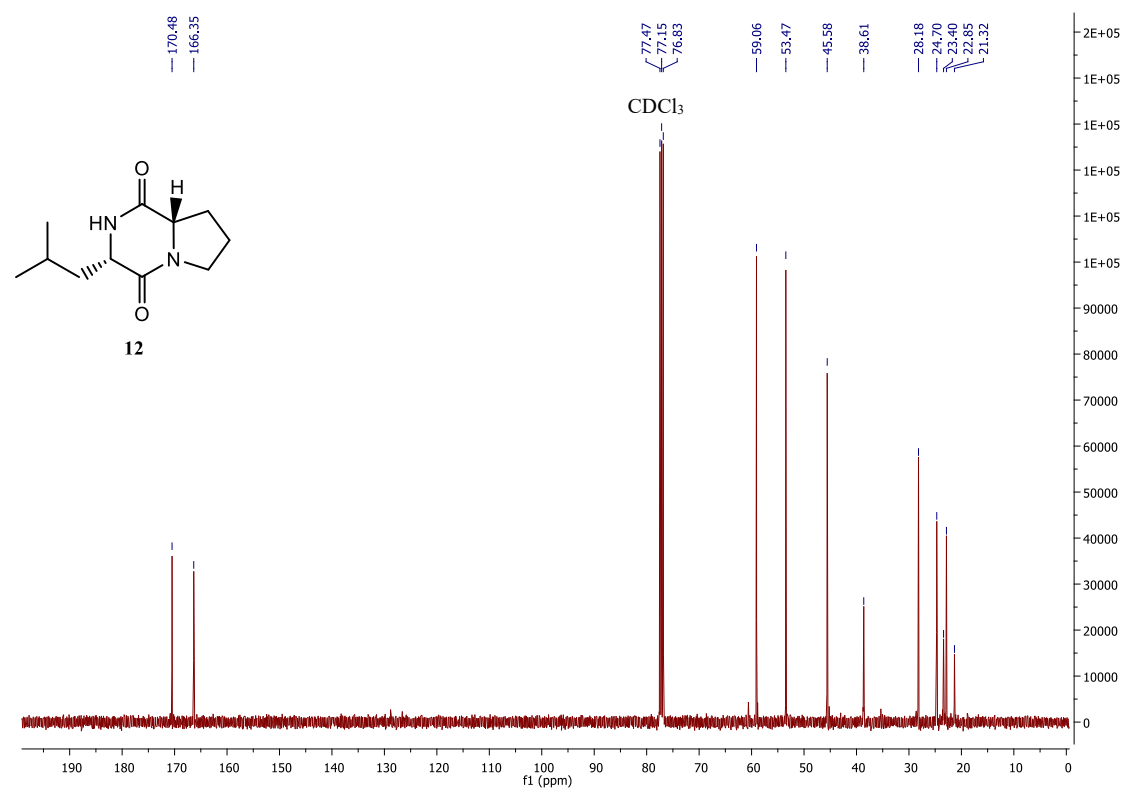

Figure S24:  $^1\text{H}$  NMR (400 MHz,  $\text{CDCl}_3$ ) spectrum of compound **13**

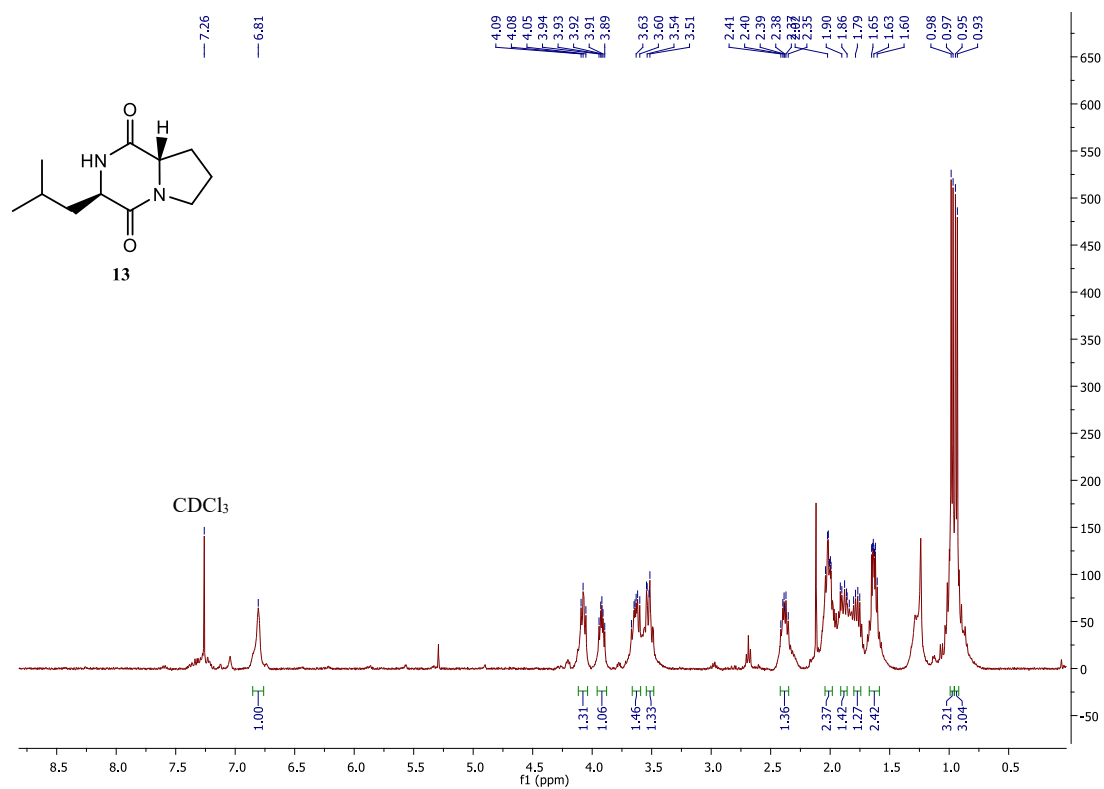

Figure S25:  $^{13}\text{C}$  NMR (100 MHz,  $\text{CDCl}_3$ ) spectrum of compound **13**

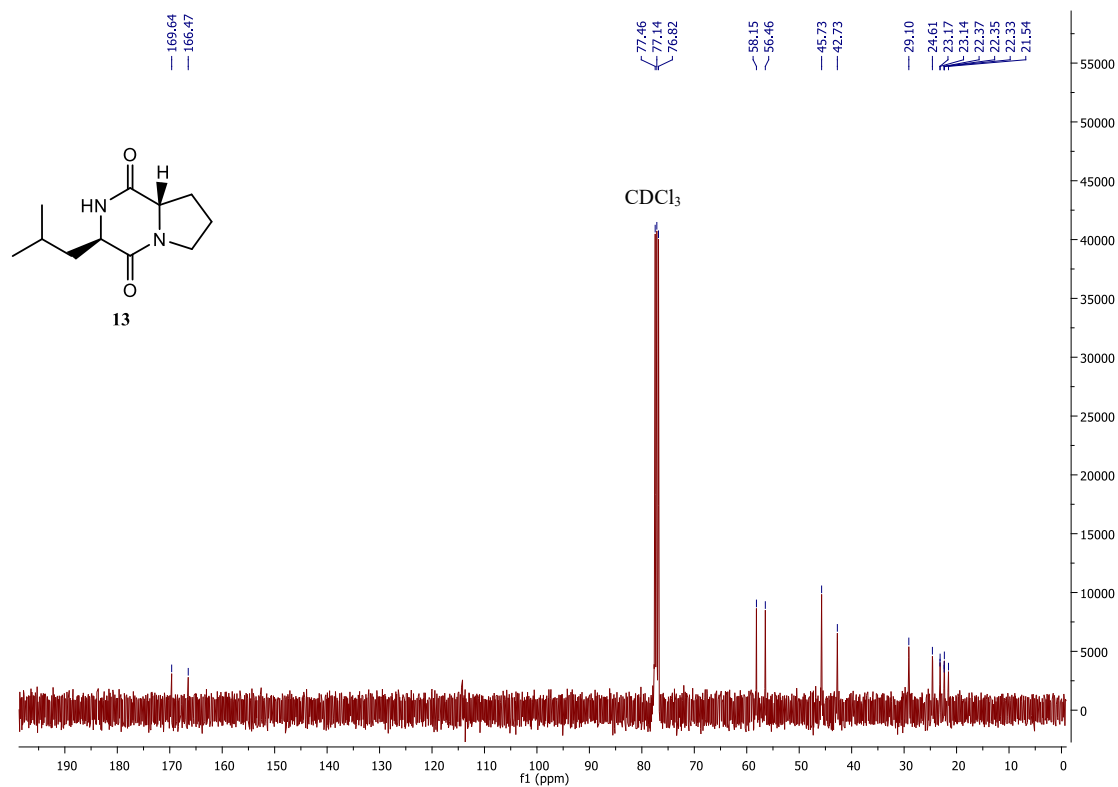

Figure S26:  $^1\text{H}$  NMR (400 MHz,  $\text{MeOH-}d_4$ ) spectrum of compound **14**

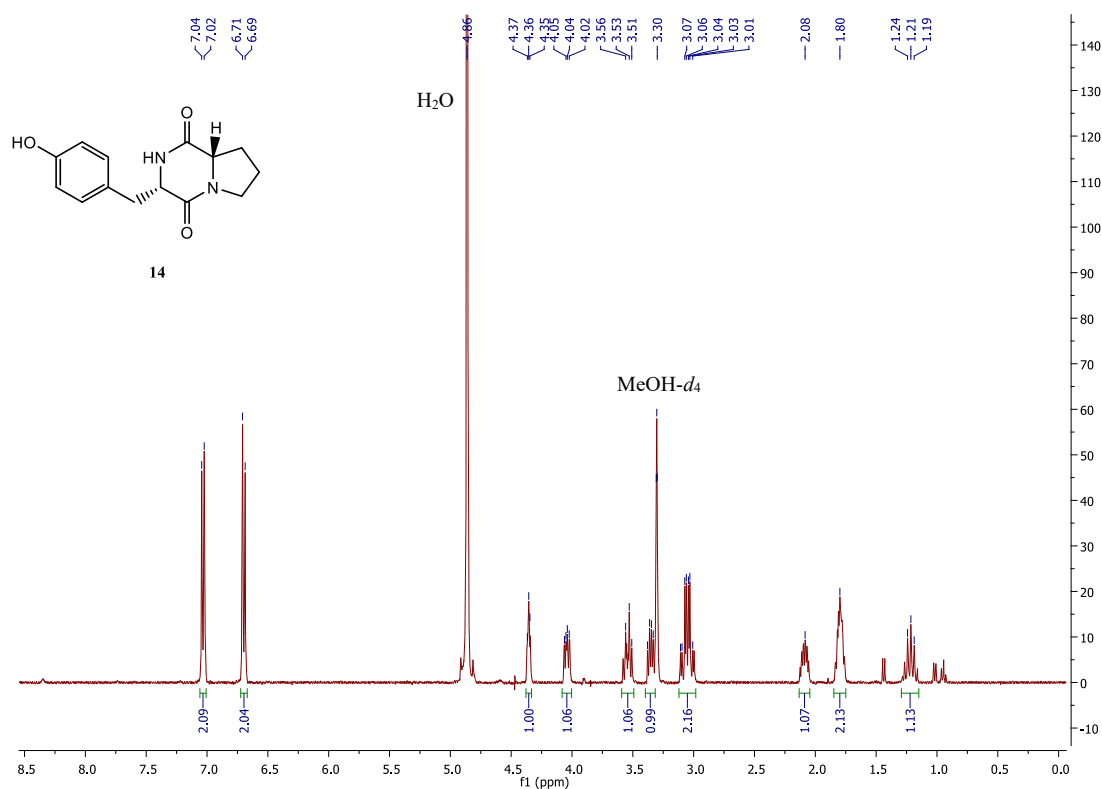

Figure S27:  $^{13}\text{C}$  NMR (100 MHz,  $\text{MeOH-}d_4$ ) spectrum of compound **14**

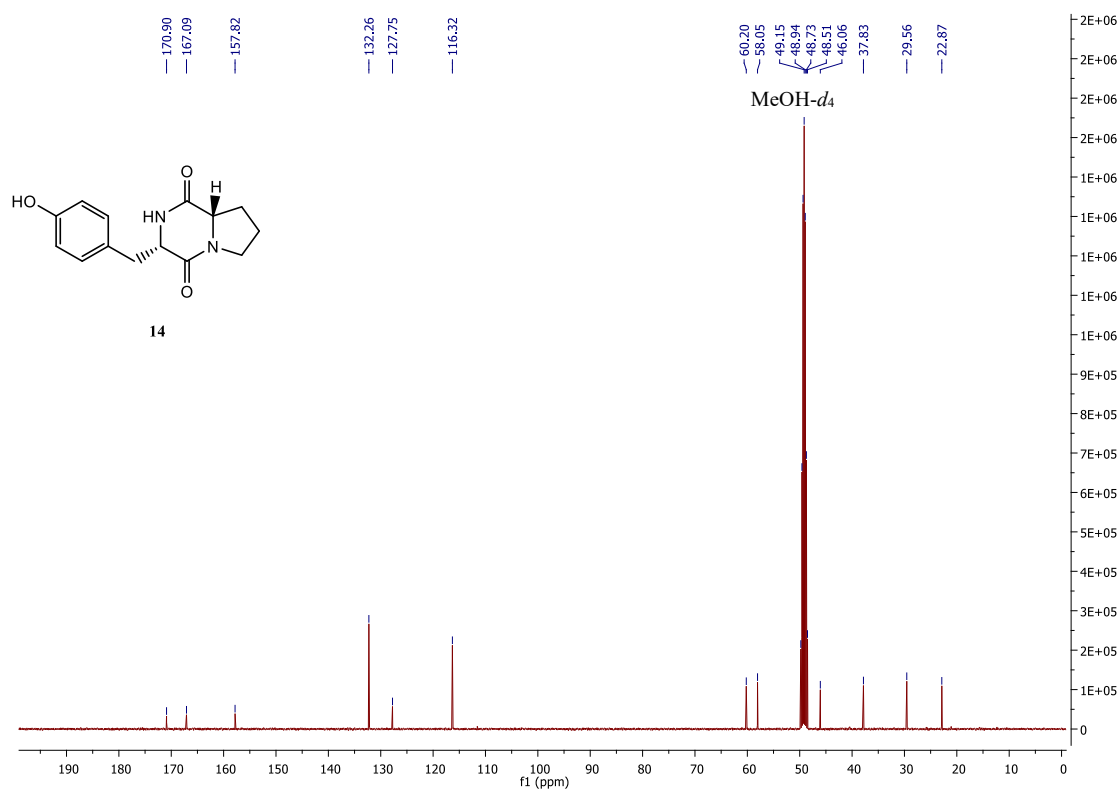

Figure S28:  $^1\text{H}$  NMR (400 MHz,  $\text{MeOH-}d_4$ ) spectrum of compound **15**

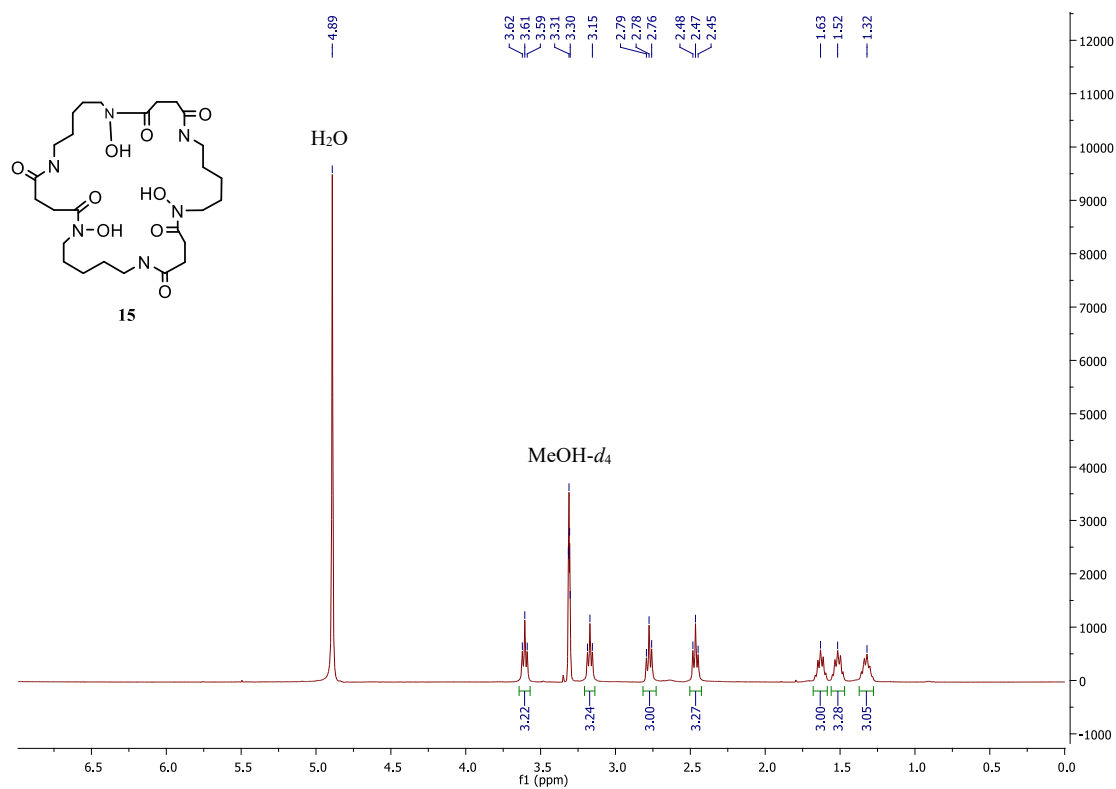

Figure S29:  $^{13}\text{C}$  NMR (100 MHz,  $\text{MeOH-}d_4$ ) spectrum of compound **15**

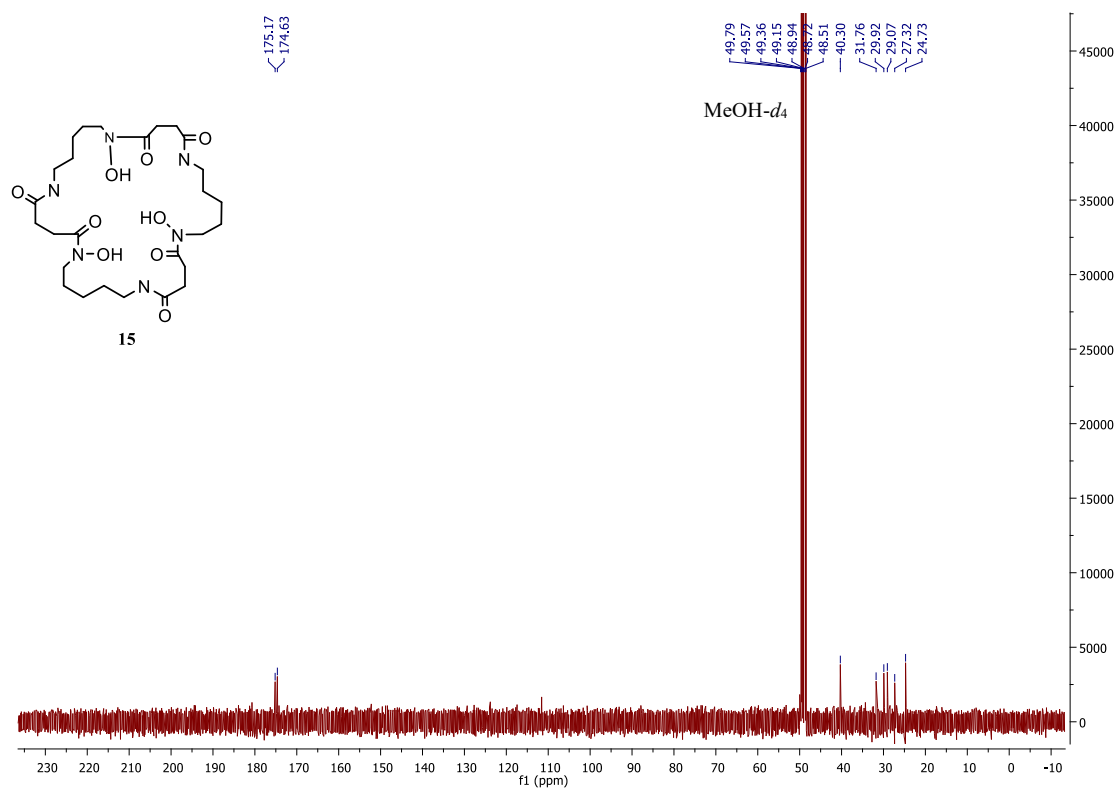

Figure S30:  $^1\text{H}$  NMR (400 MHz,  $\text{MeOH-}d_4$ ) spectrum of compound **16**

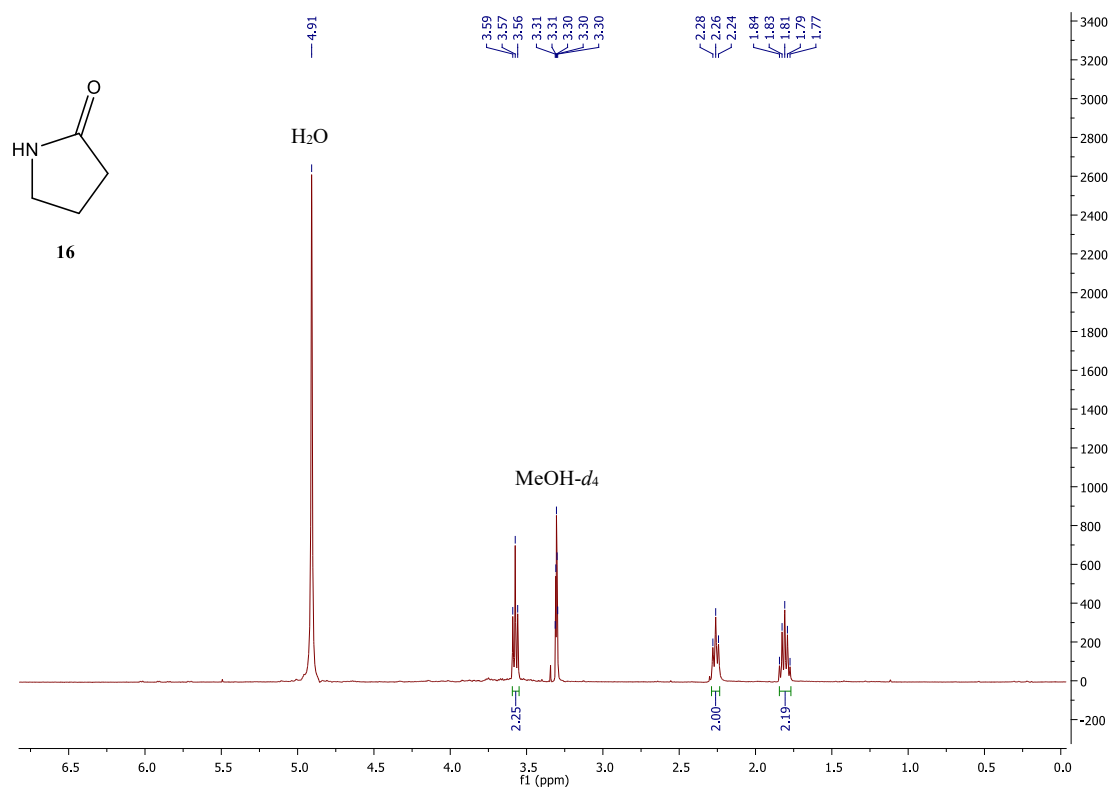

Figure S31:  $^{13}\text{C}$  NMR (100 MHz,  $\text{MeOH-}d_4$ ) spectrum of compound **16**

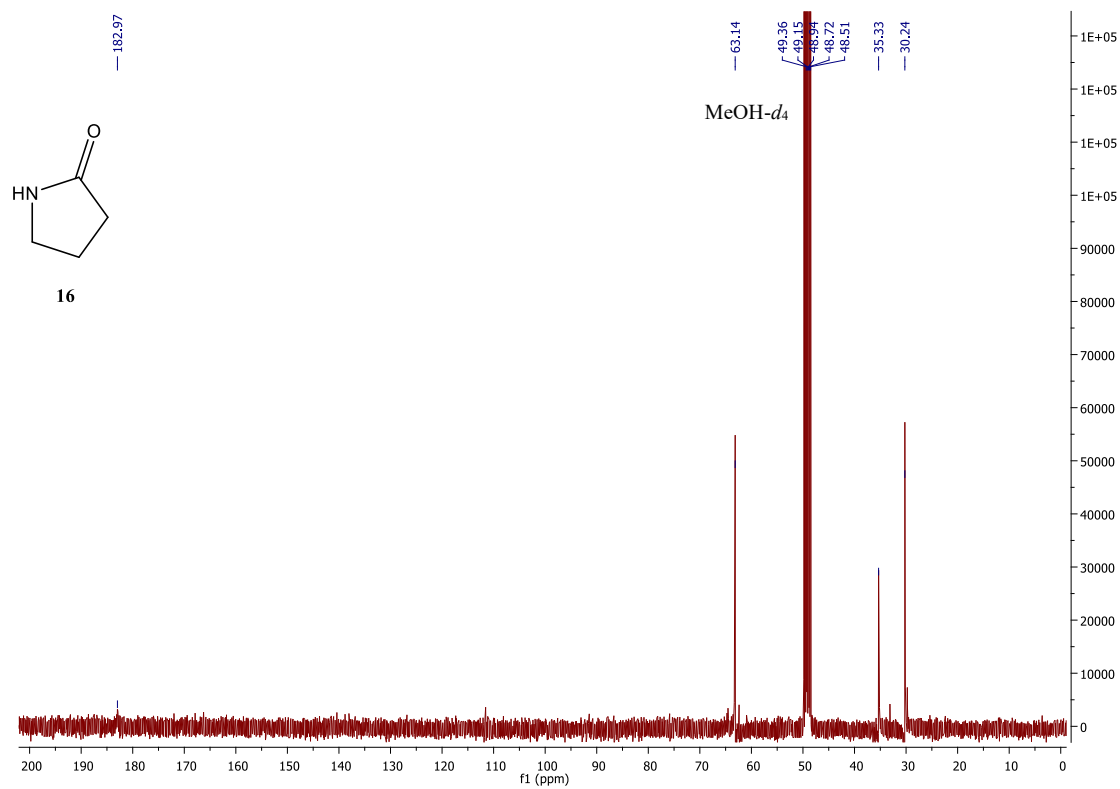

Figure S32:  $^1\text{H}$  NMR (400 MHz,  $\text{MeOH-}d_4$ ) spectrum of compound **17**

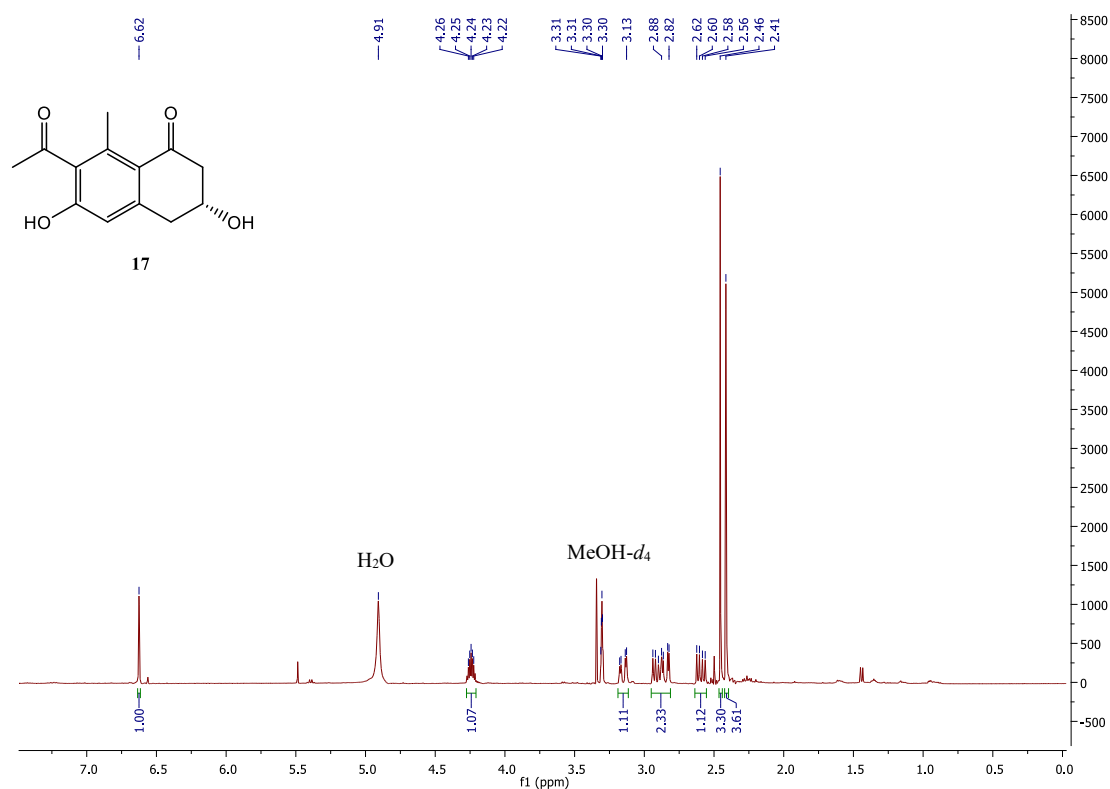

Figure S33:  $^{13}\text{C}$  NMR (100 MHz,  $\text{MeOH-}d_4$ ) spectrum of compound **17**

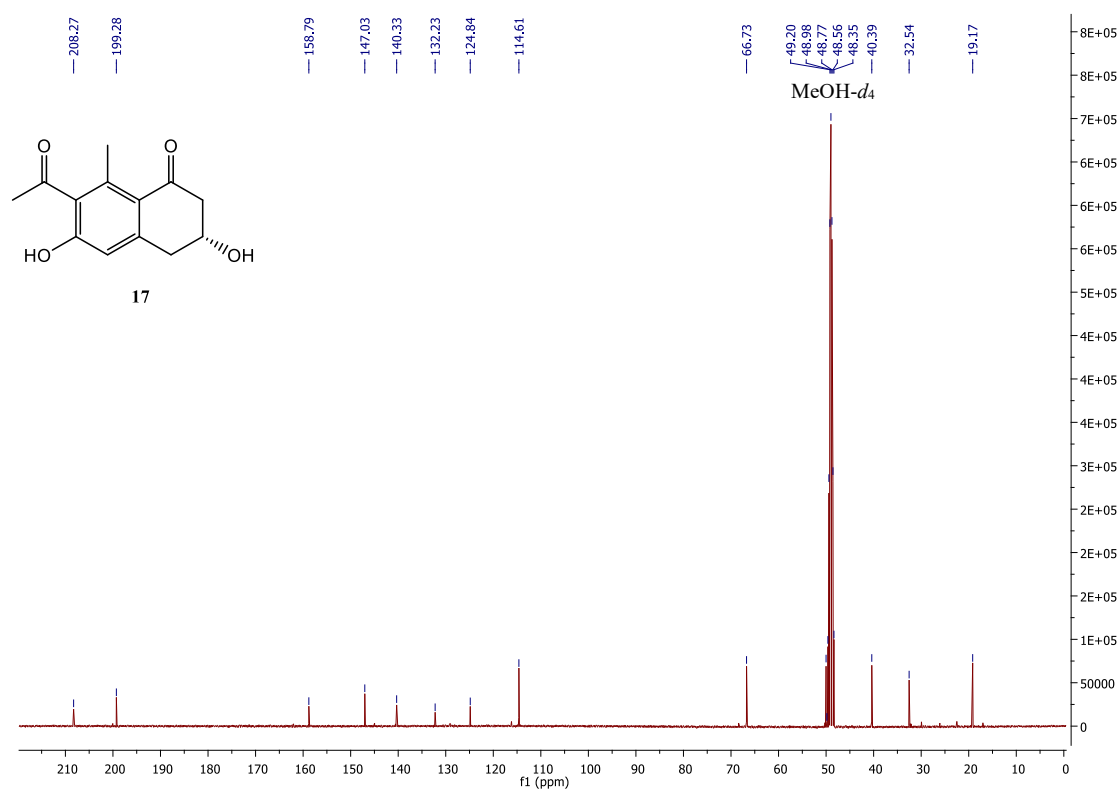



Figure S34:  $^1\text{H}$  NMR (400 MHz,  $\text{CDCl}_3$ ) spectrum of compound **18**

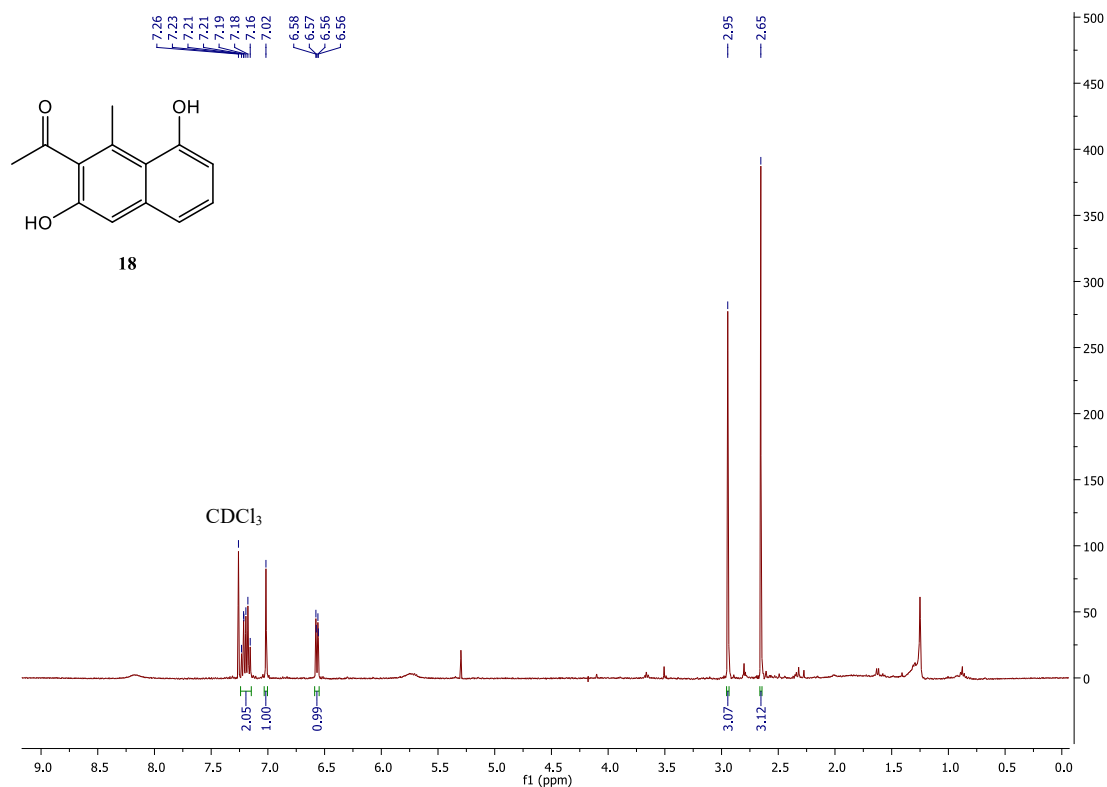

Figure S35:  $^{13}\text{C}$  NMR (100 MHz,  $\text{CDCl}_3$ ) spectrum of compound **18**

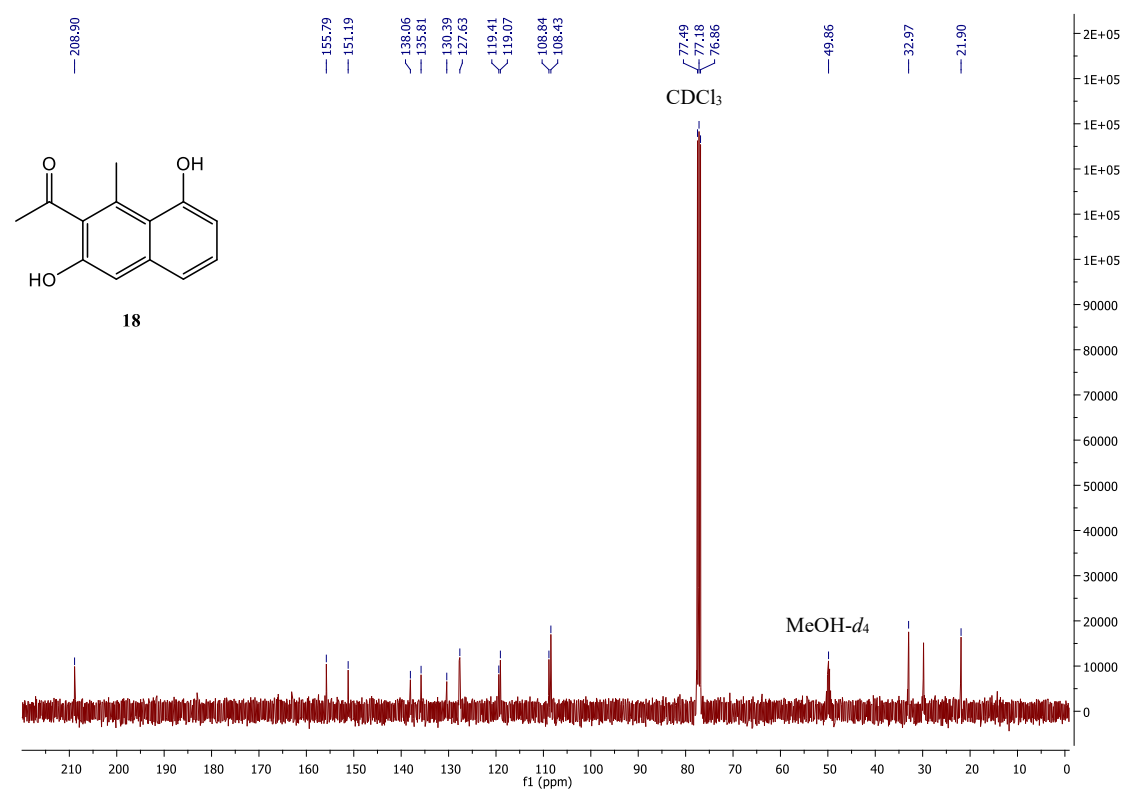

## 2. Experimental spectra of novel compounds 19-23

Figure S36: HRESIMS spectrum of compound 19

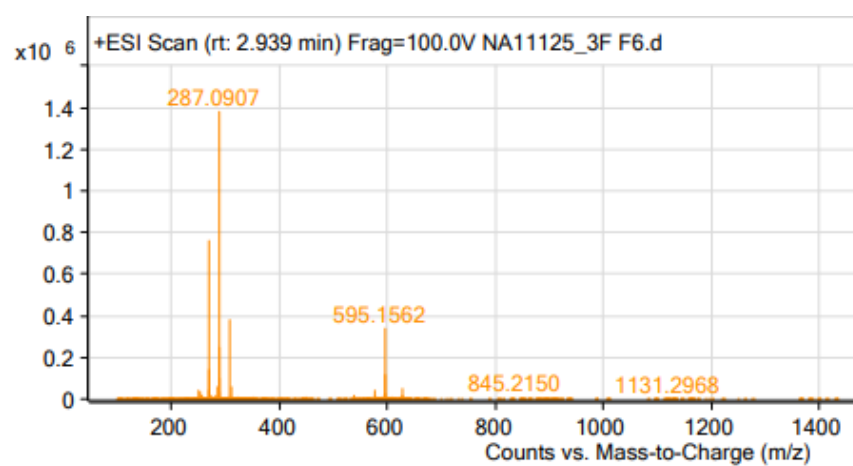

Figure S37: UV absorption spectrum of compound **19**

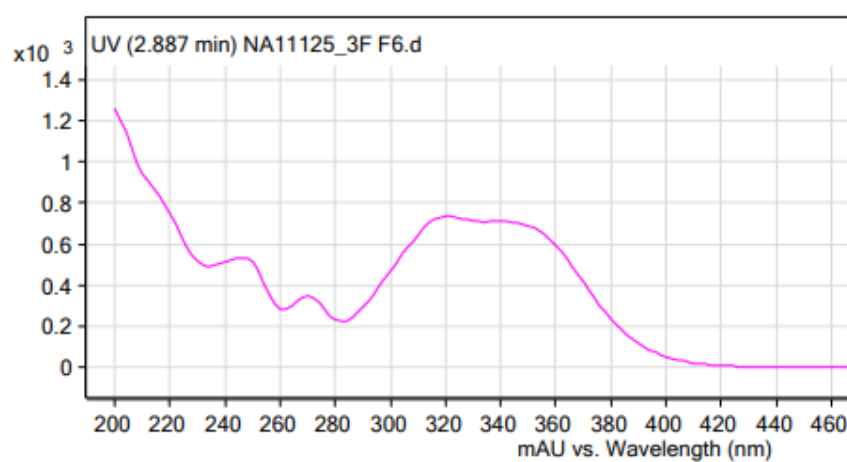

Figure S38: IR spectrum of compound **19**

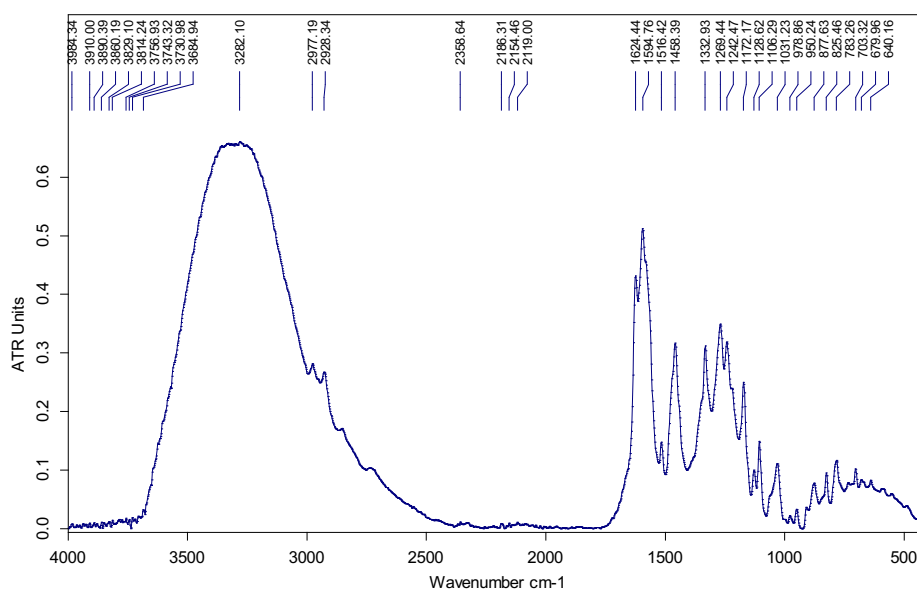

Figure S39:  $^1\text{H}$  NMR (400 MHz,  $\text{CDCl}_3$  +  $\text{MeOH-}d_4$ ) spectrum of compound **19**

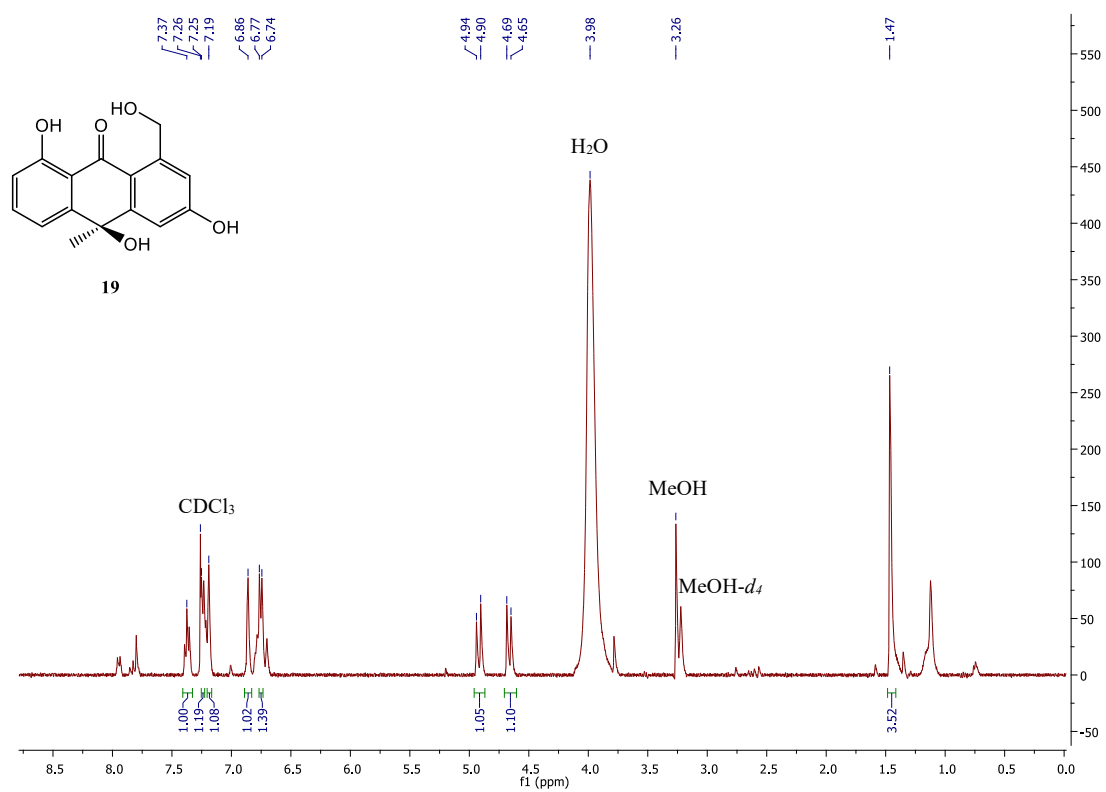

Figure S40:  $^1\text{H}$ - $^1\text{H}$  COSY (400 MHz,  $\text{CDCl}_3 + \text{MeOH-}d_4$ ) spectrum of compound **19**

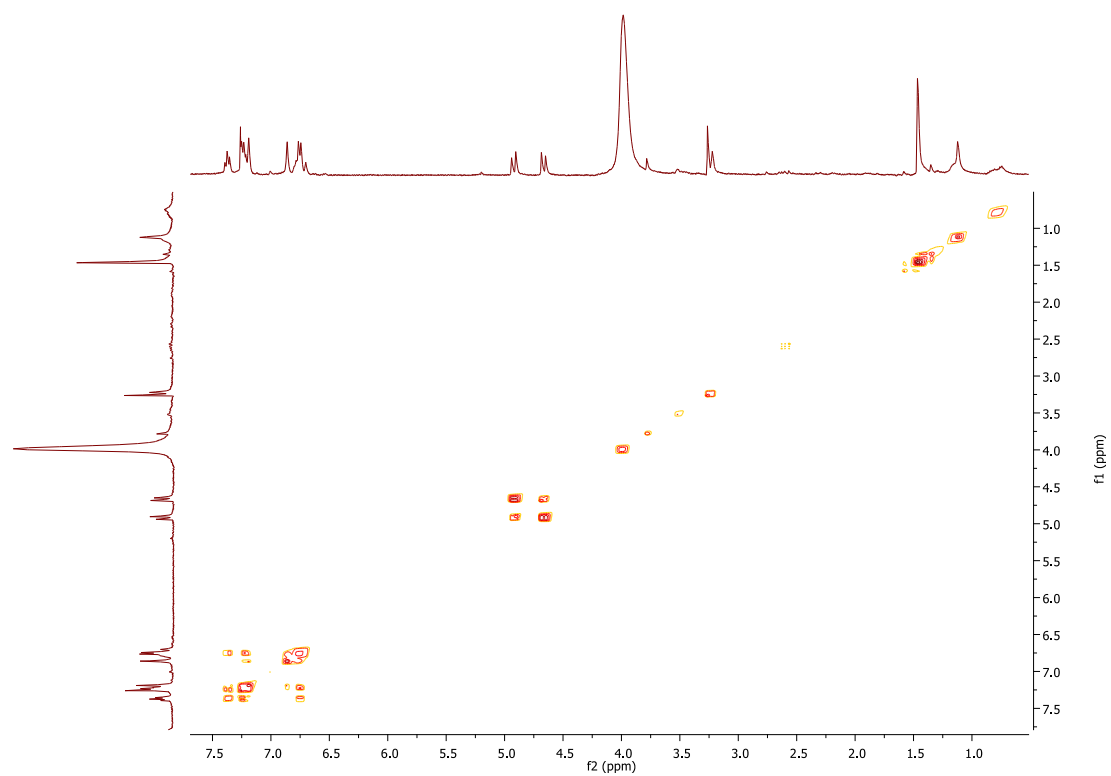

Figure S41: gHSQC (400 MHz and 100MHz,  $\text{CDCl}_3 + \text{MeOH-}d_4$ ) spectrum of compound **19**

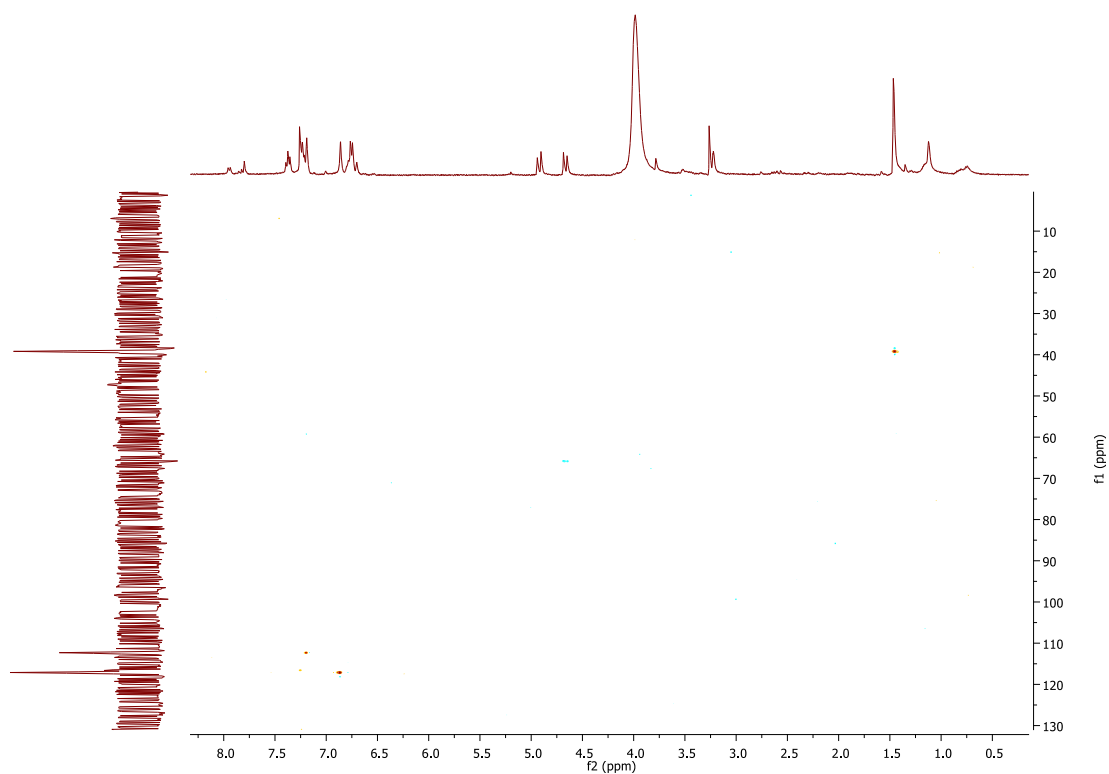

Figure S42: gHMBC (400 MHz and 100MHz,  $\text{CDCl}_3 + \text{MeOH-}d_4$ ) spectrum of compound **19**

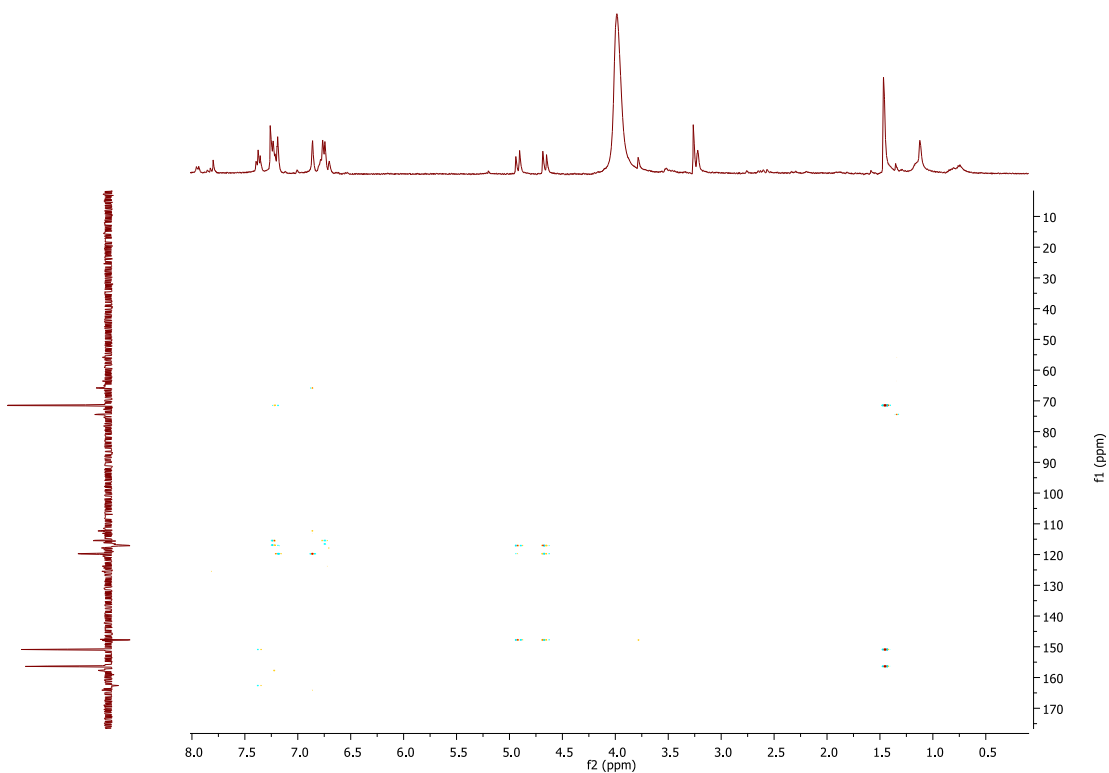

Figure S43: HRESIMS spectrum of compound **20**

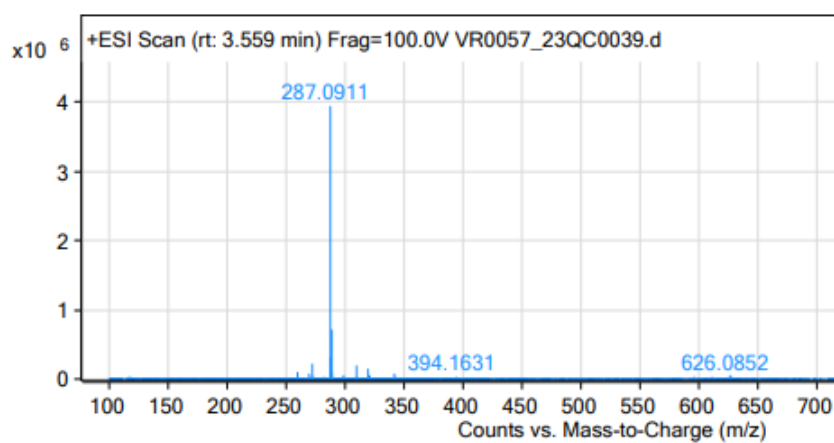

Figure S44: UV absorption spectrum of compound **20**

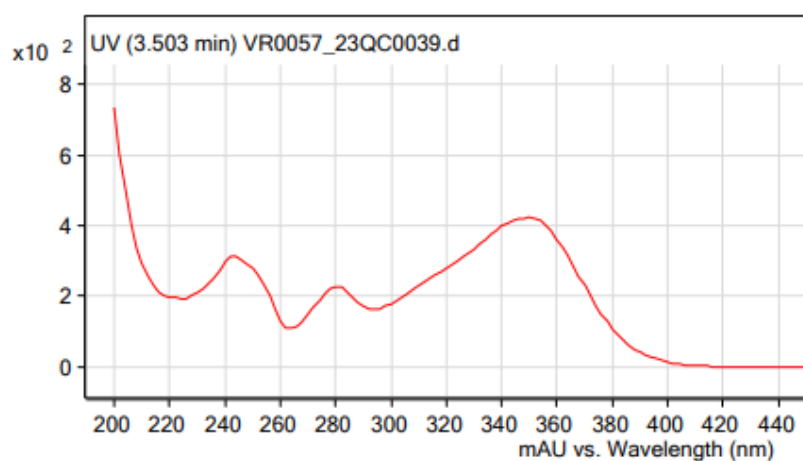

Figure S45: IR spectrum of compound **20**

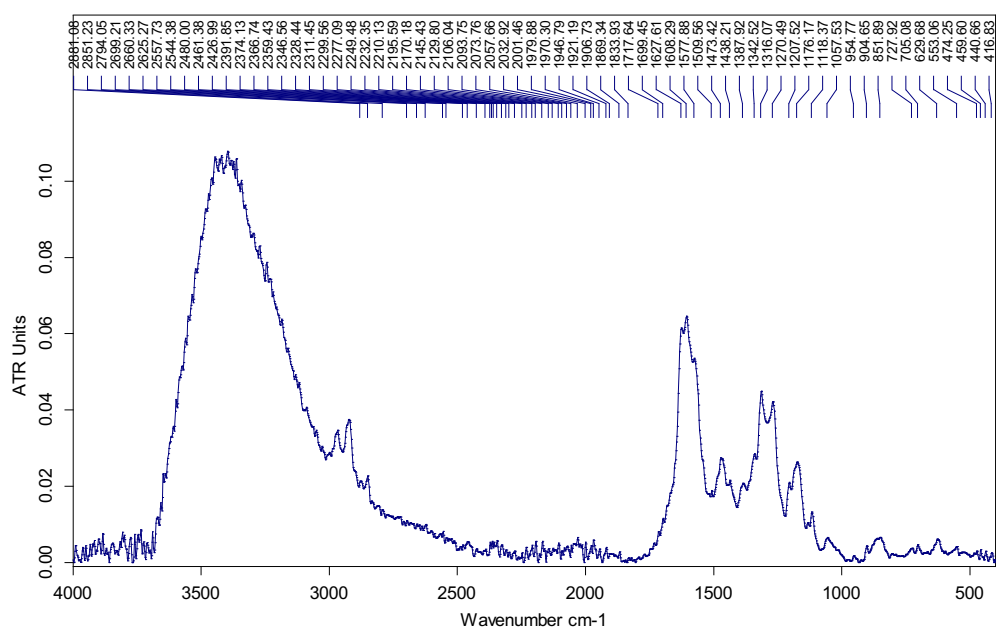

Figure S46:  $^1\text{H}$  NMR (400 MHz,  $\text{MeOH-}d_4$ ) spectrum of compound **20**

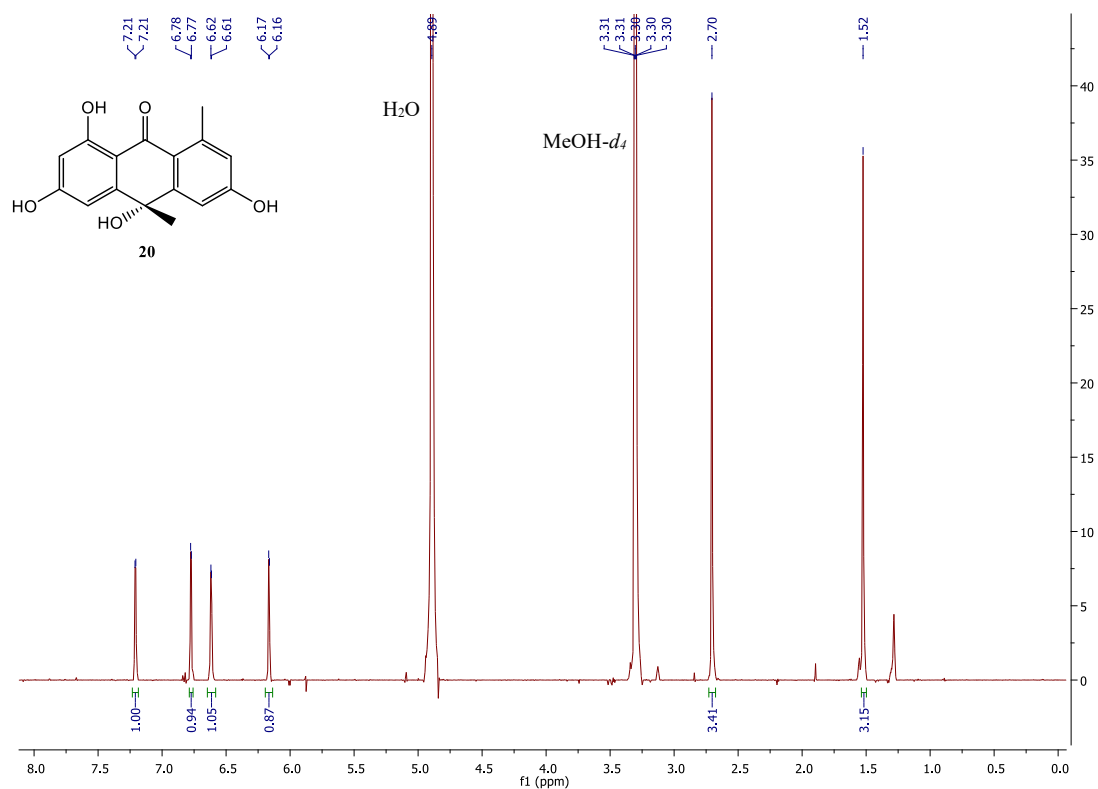

Figure S47:  $^{13}\text{C}$  NMR (100 MHz,  $\text{MeOH-}d_4$ ) spectrum of compound **20**

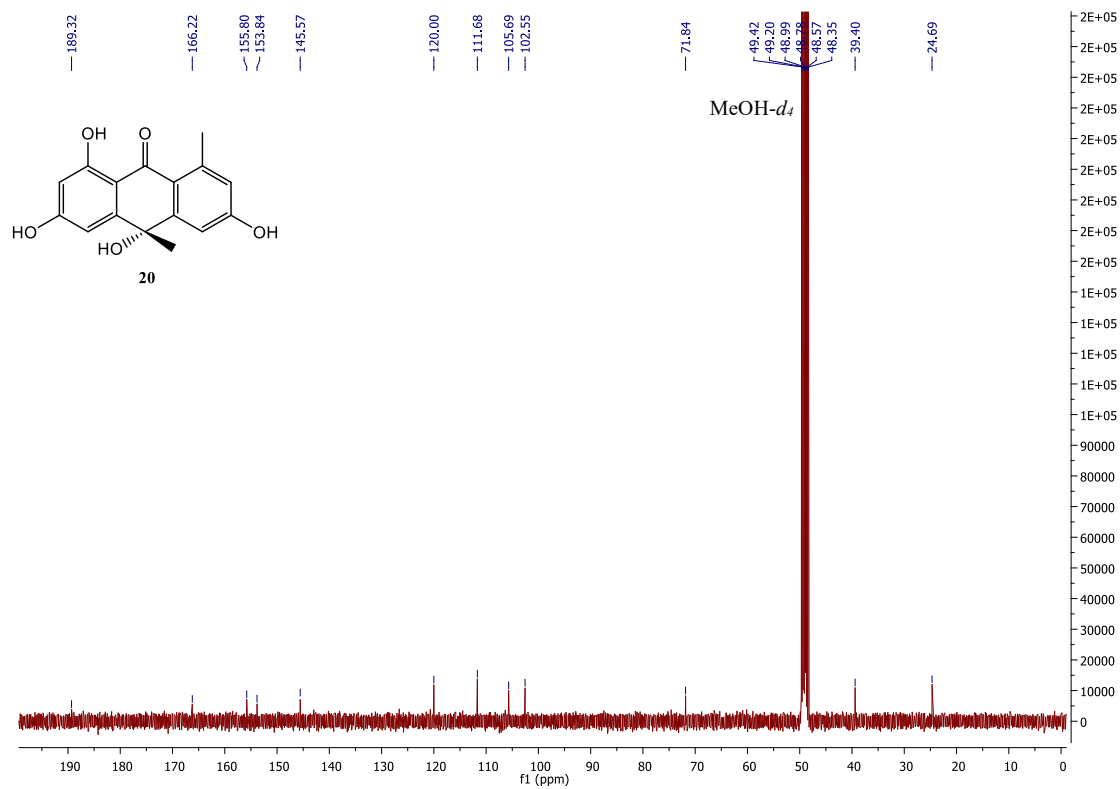

Figure S48:  $^1\text{H}$ - $^1\text{H}$  COSY (400 MHz,  $\text{MeOH-}d_4$ ) spectrum of compound **20**

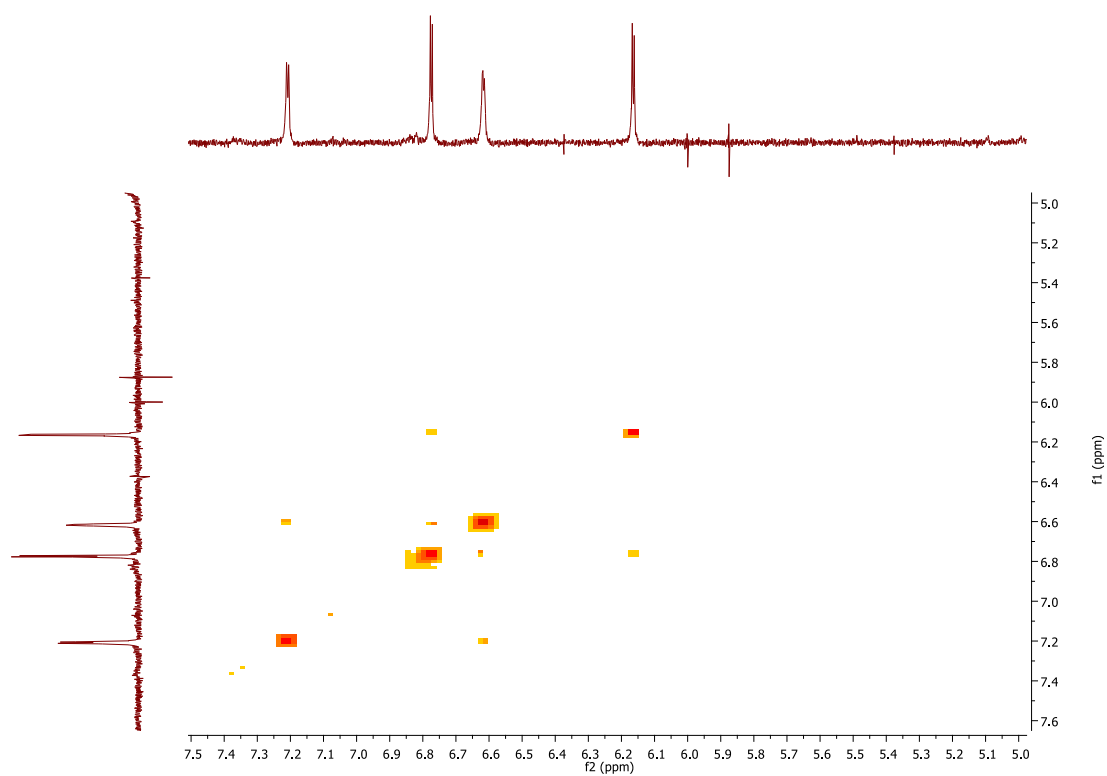

Figure S49a: gHSQC (400 MHz and 100MHz,  $\text{MeOH-}d_4$ ) spectrum of compound **20**

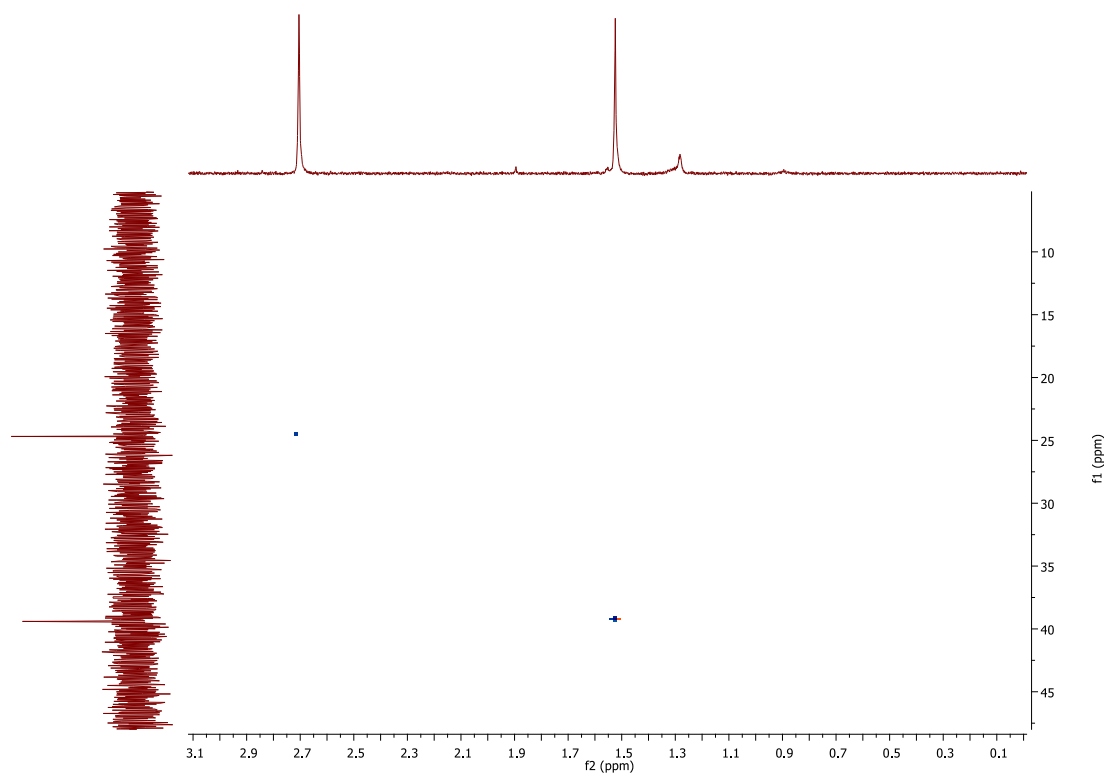



Figure S49b: gHSQC (400 MHz and 100MHz, MeOH-*d*<sub>4</sub>) spectrum of compound **20**

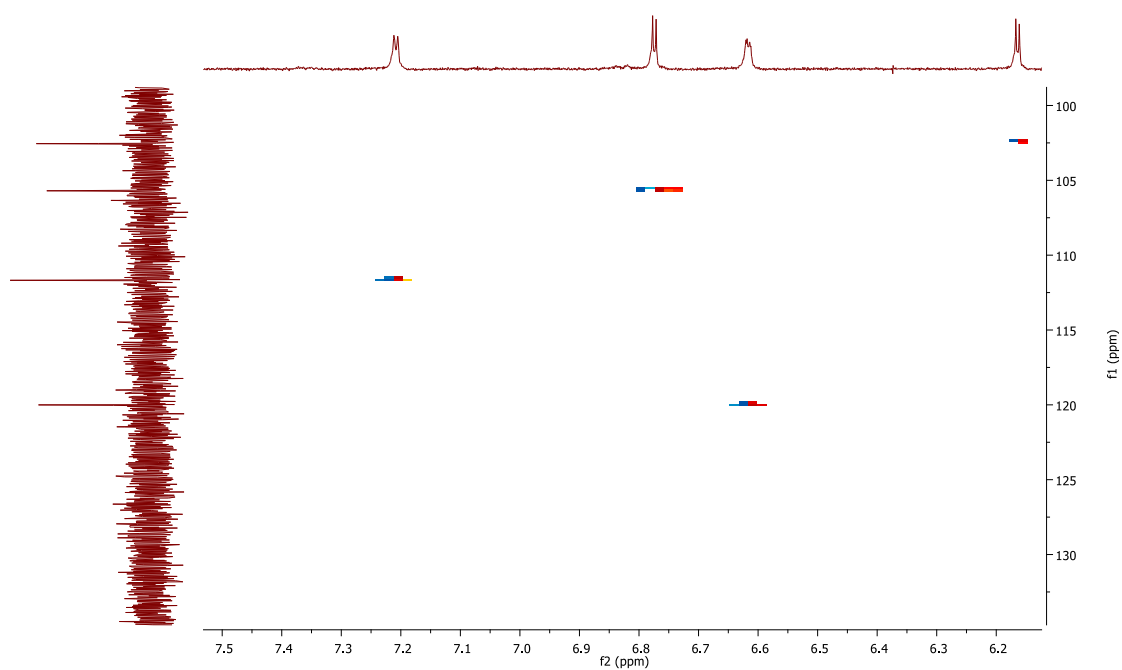

Figure S50a: gHMBC (400 MHz and 100MHz, MeOH-*d*<sub>4</sub>) spectrum of compound **20**

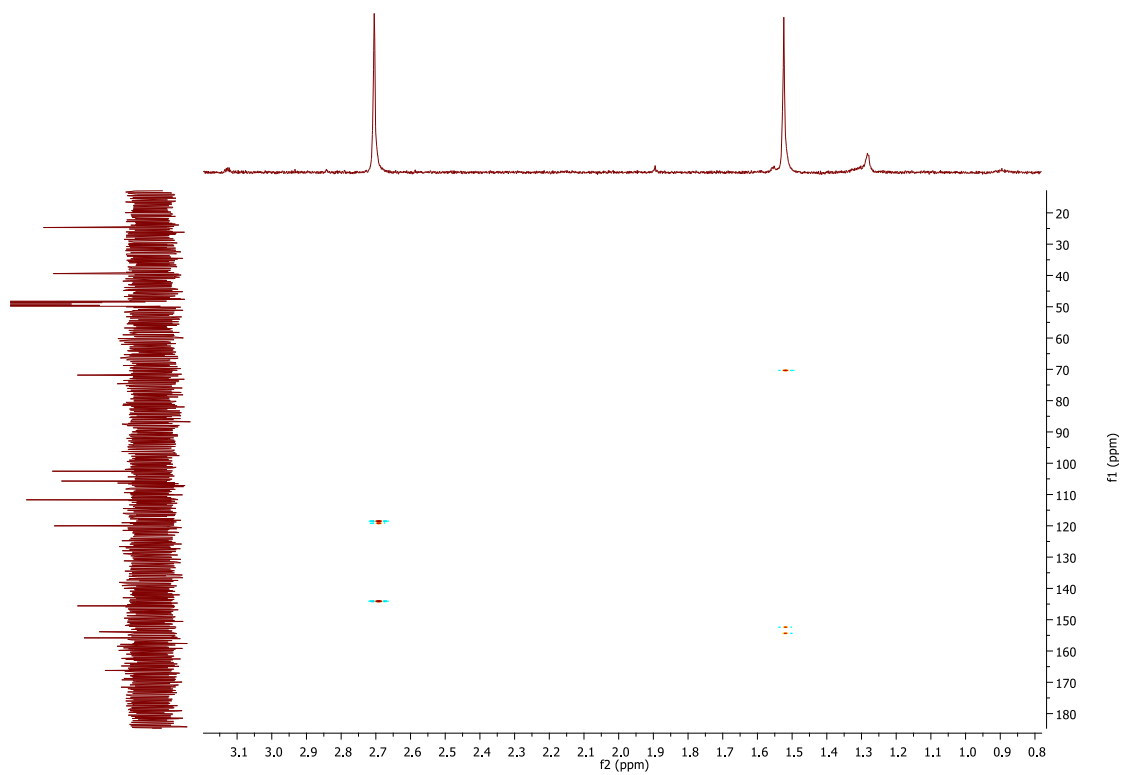

Figure S50b: gHMBC (400 MHz and 100MHz, MeOH- $d_4$ ) spectrum of compound **20**

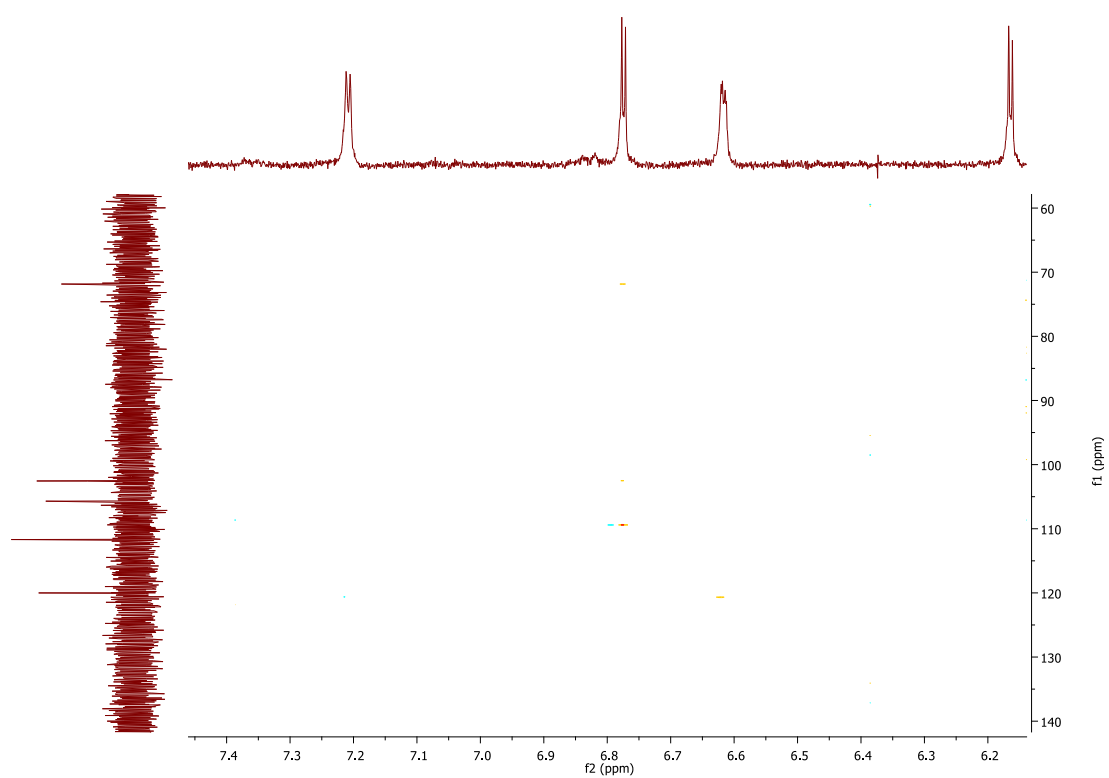

Figure S51: HRESIMS spectrum of compound **21**

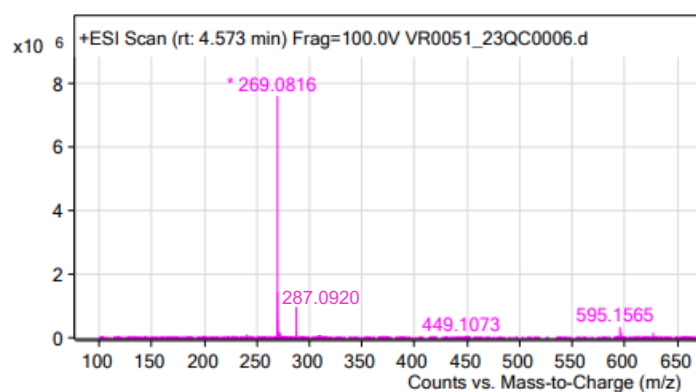

Figure S52: UV absorption spectrum of compound **21**

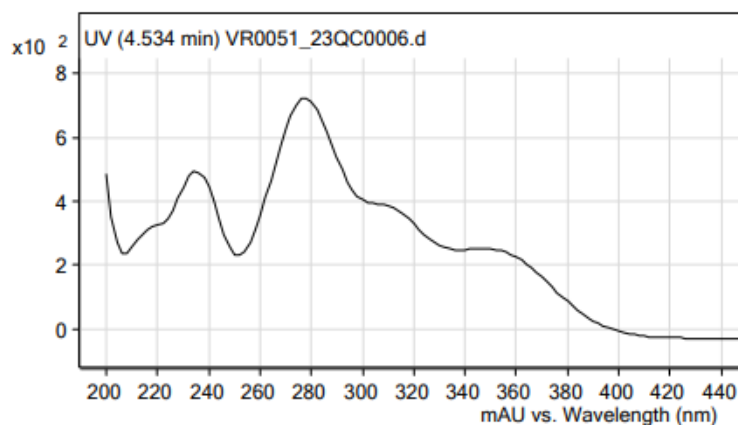

Figure S53: IR spectrum of compound **21**

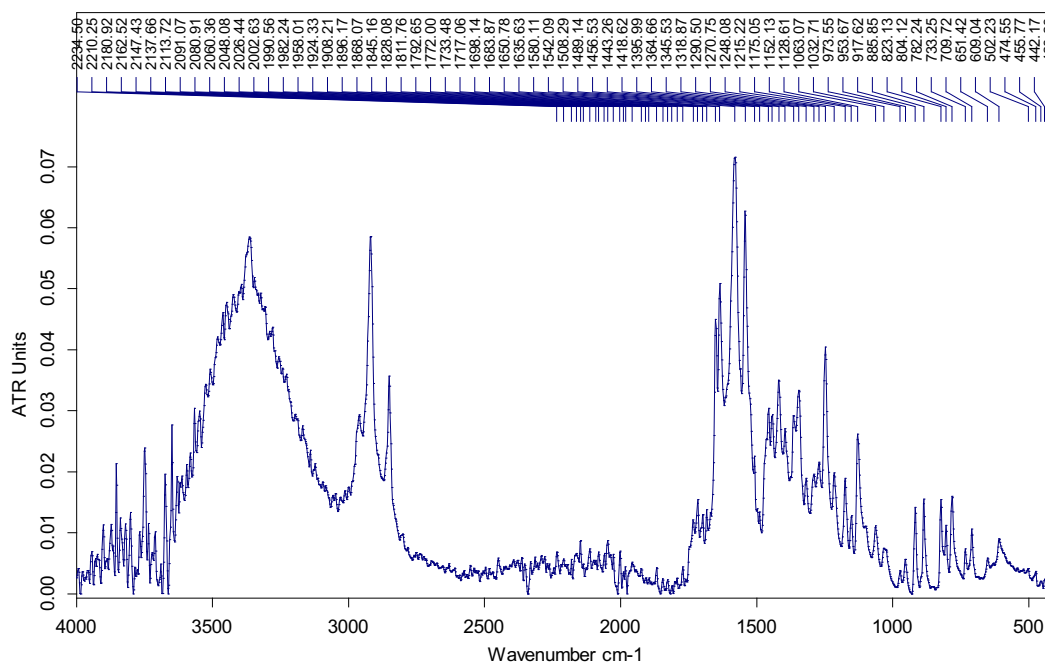

Figure S54:  $^1\text{H}$  NMR (400 MHz,  $\text{CDCl}_3$ ) spectrum of compound **21**

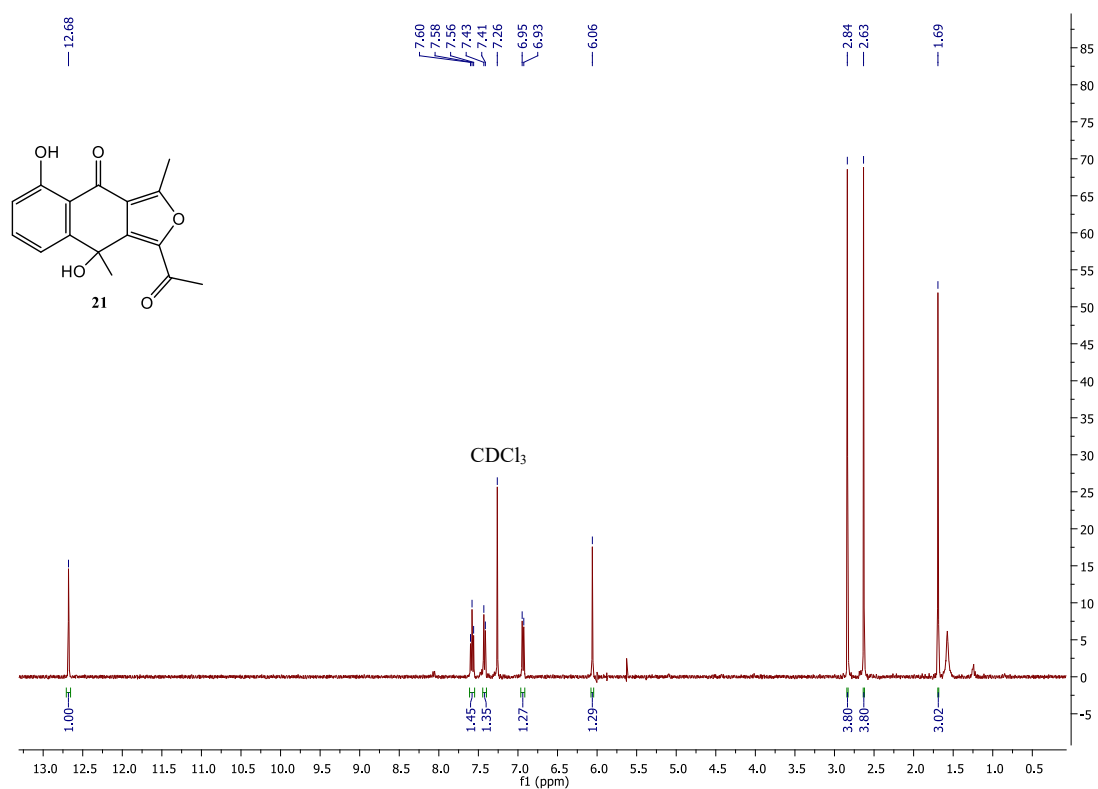

Figure S55:  $^{13}\text{C}$  NMR (100 MHz,  $\text{CDCl}_3$ ) spectrum of compound **21**

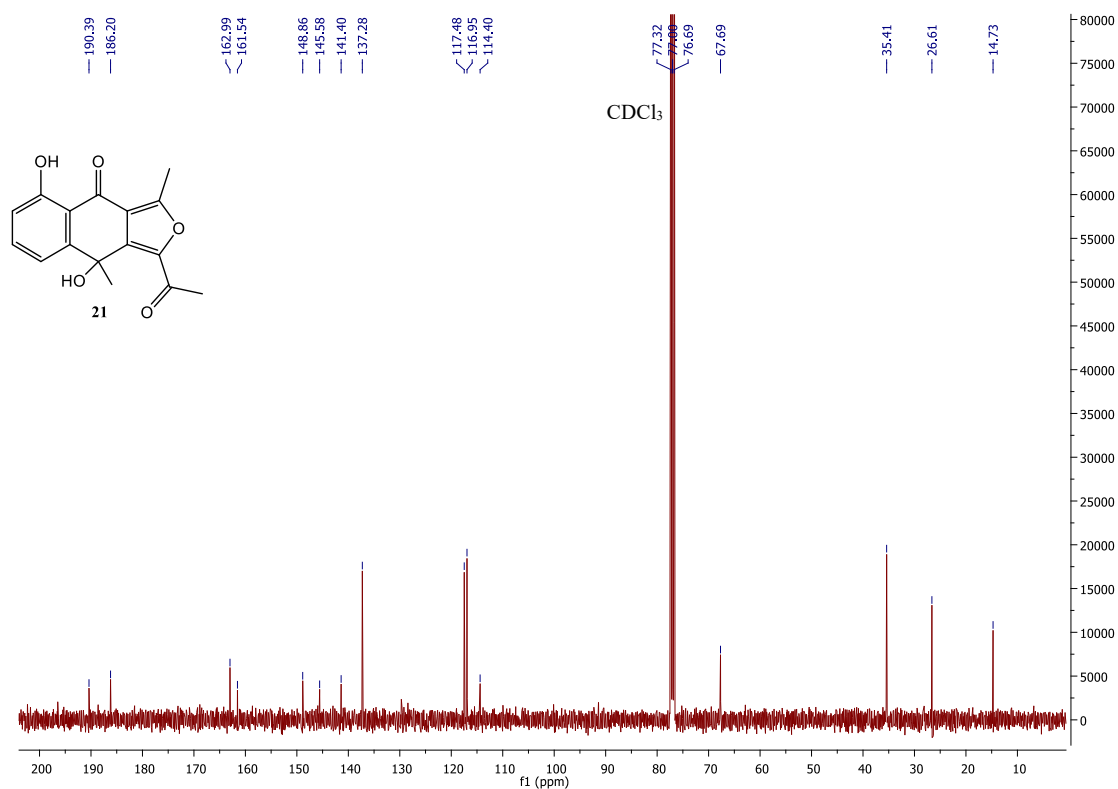

Figure S56:  $^1\text{H}$ - $^1\text{H}$  COSY (400 MHz,  $\text{CDCl}_3$ ) spectrum of compound **21**

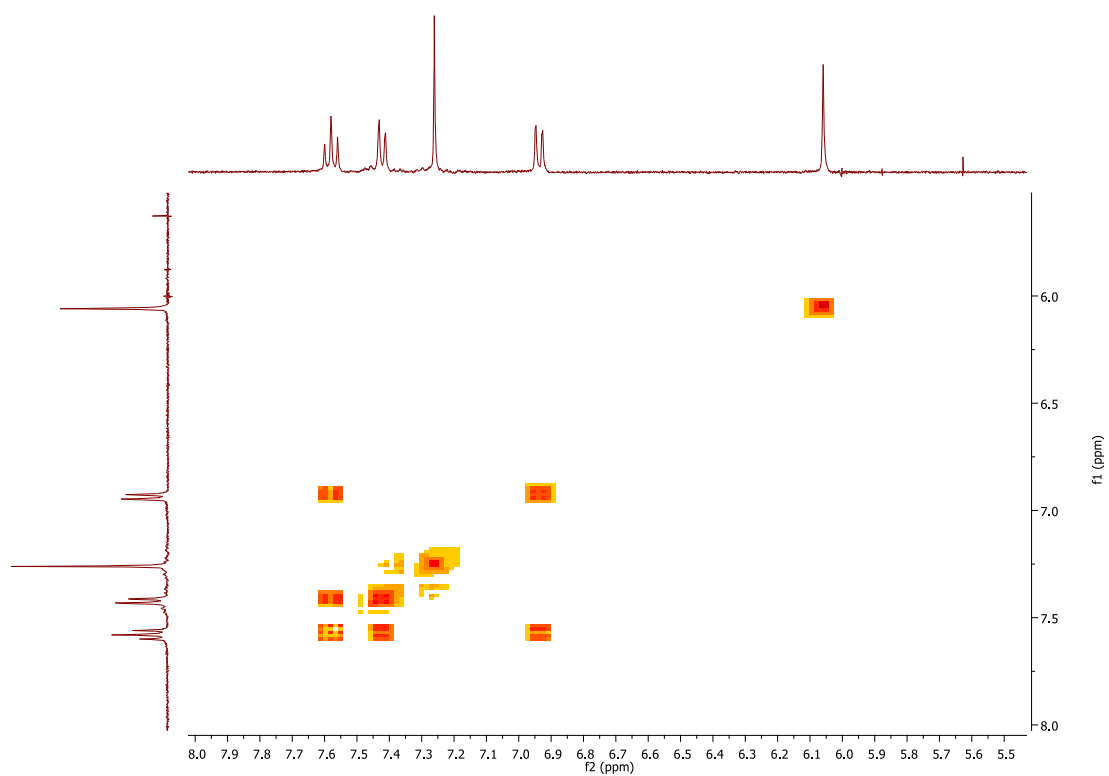

Figure S57a: gHSQC (400 MHz and 100MHz,  $\text{CDCl}_3$ ) spectrum of compound **21**

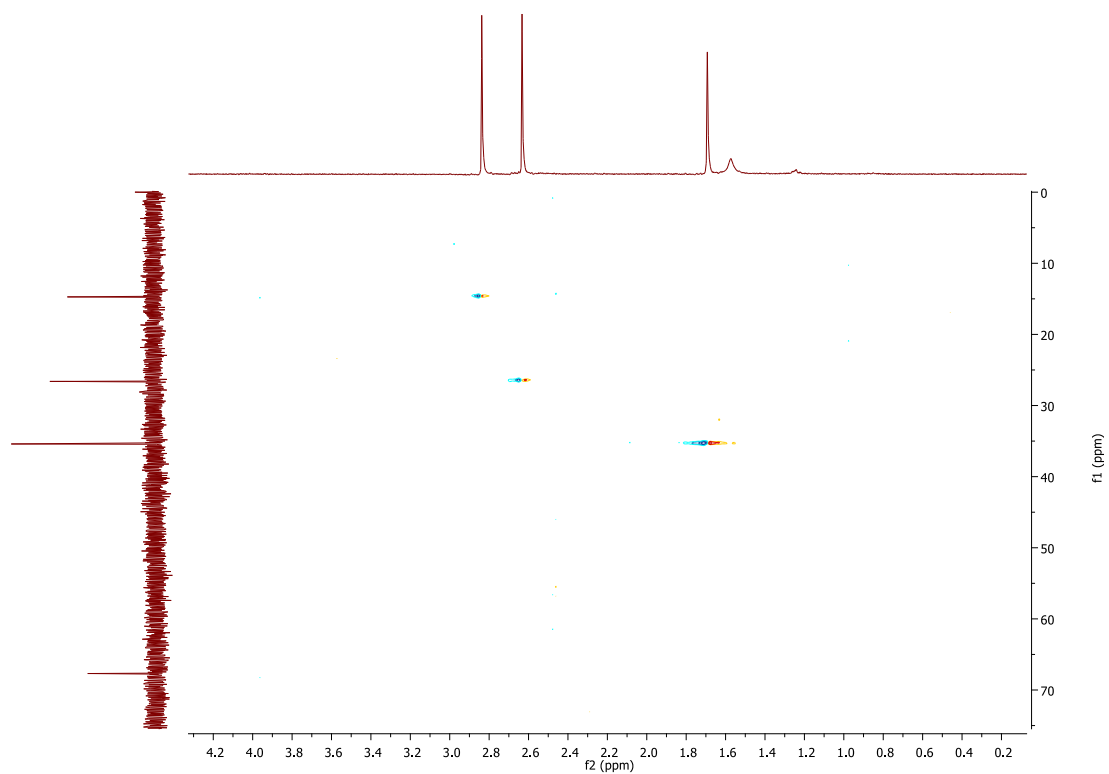

Figure S57b: gHSQC (400 MHz and 100MHz, CDCl<sub>3</sub>) spectrum of compound **21**

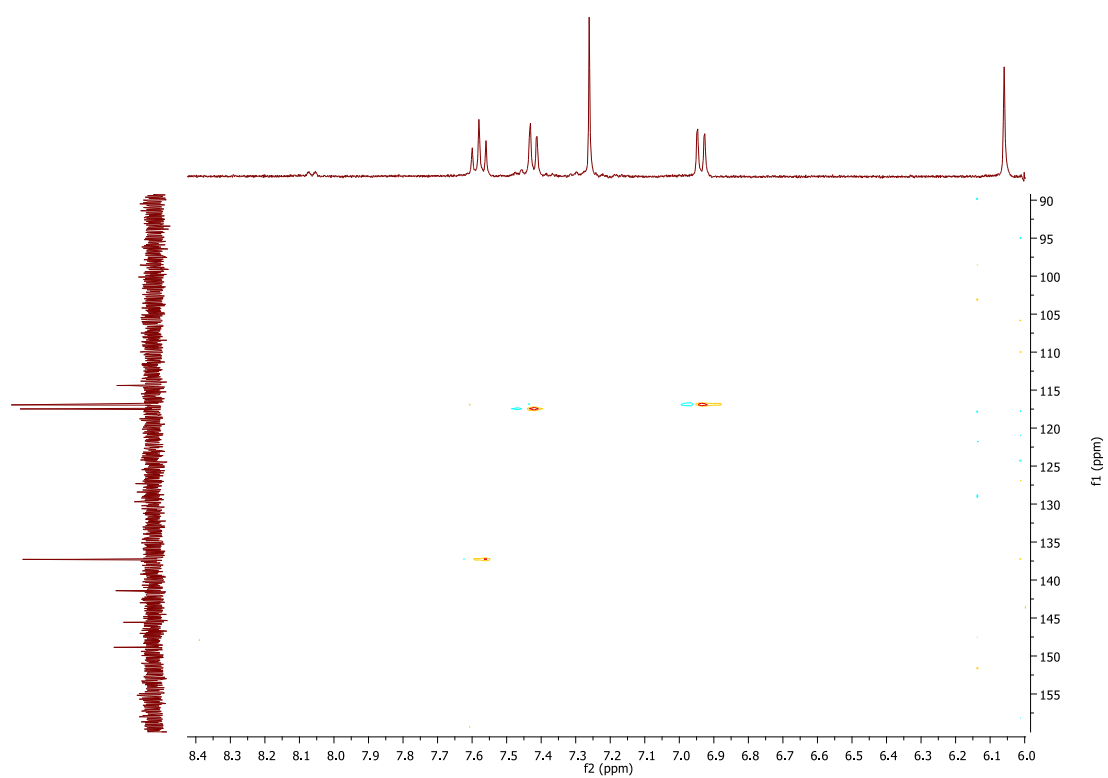

Figure S58a: gHMBC (400 MHz and 100MHz, CDCl<sub>3</sub>) spectrum of compound **21**

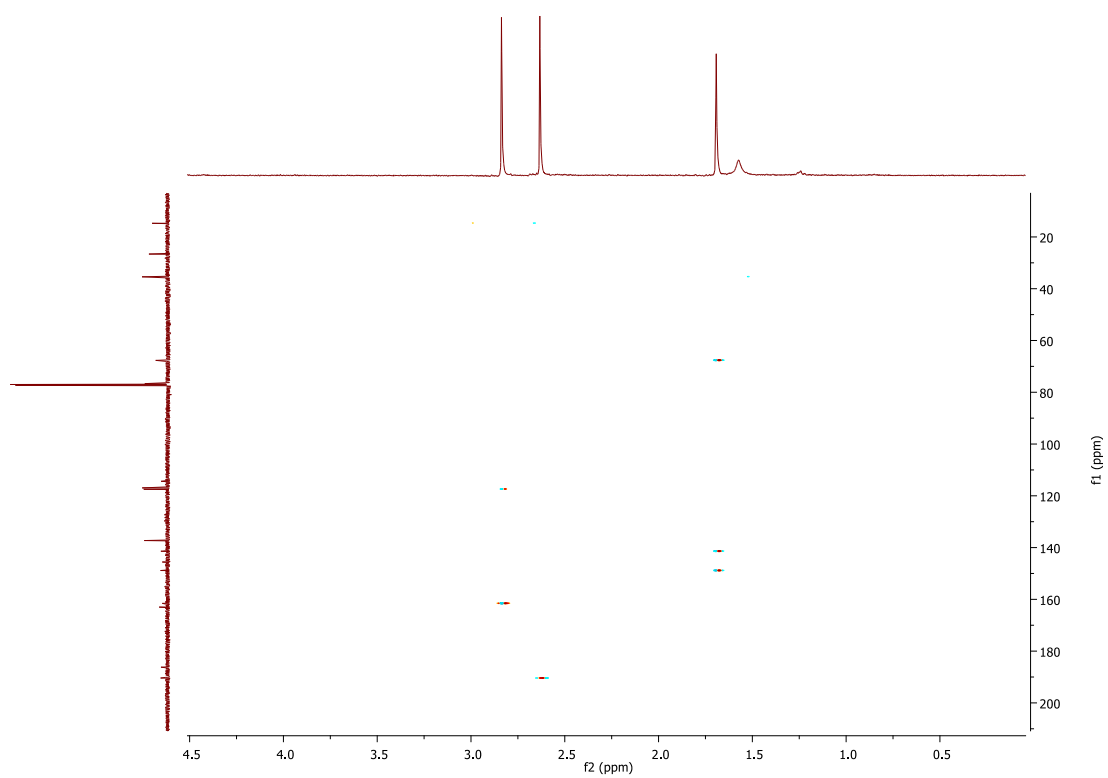

Figure S58b: gHMBC (400 MHz and 100MHz, CDCl<sub>3</sub>) spectrum of compound **21**

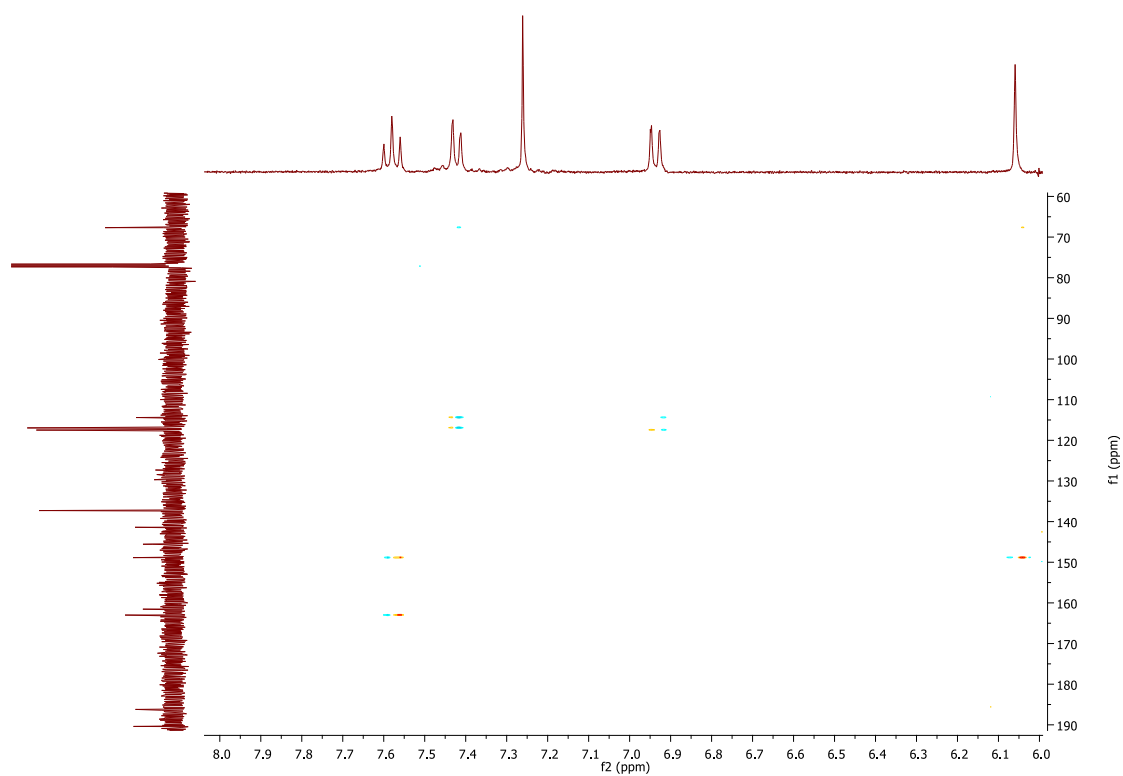

Figure S58c: gHMBC (400 MHz and 100MHz, CDCl<sub>3</sub>) spectrum of compound **21**

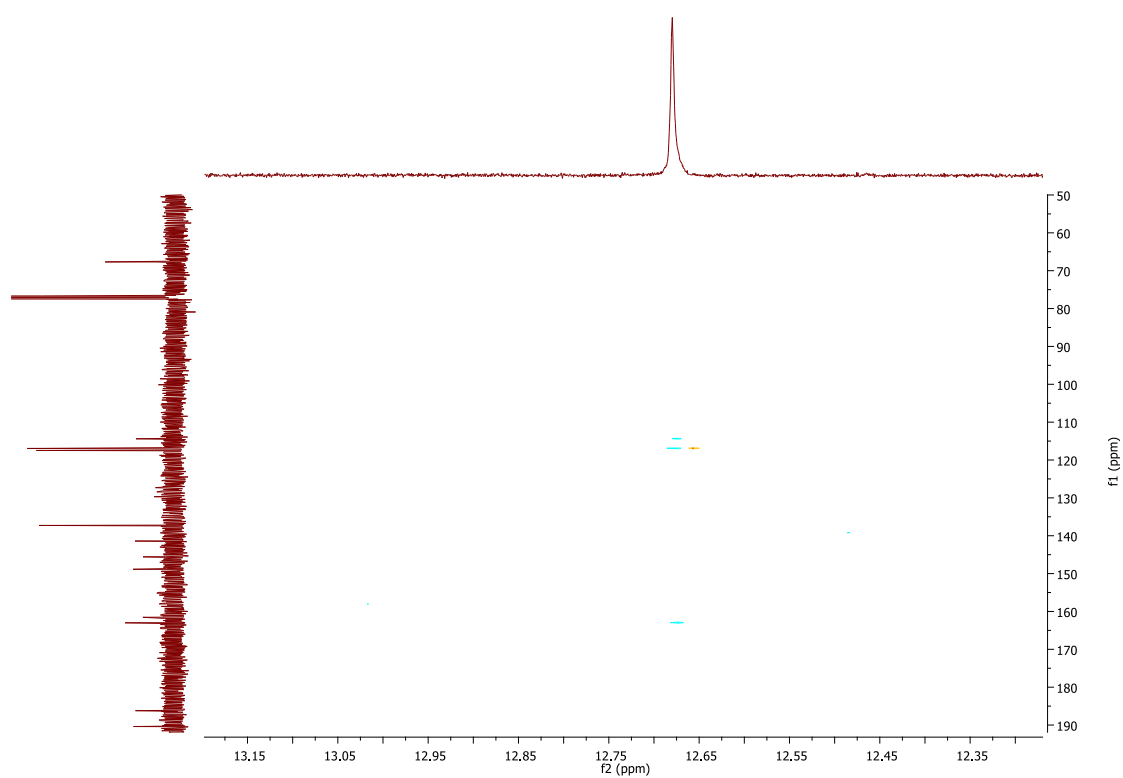

Figure S59: HRESIMS spectrum of compound **22**

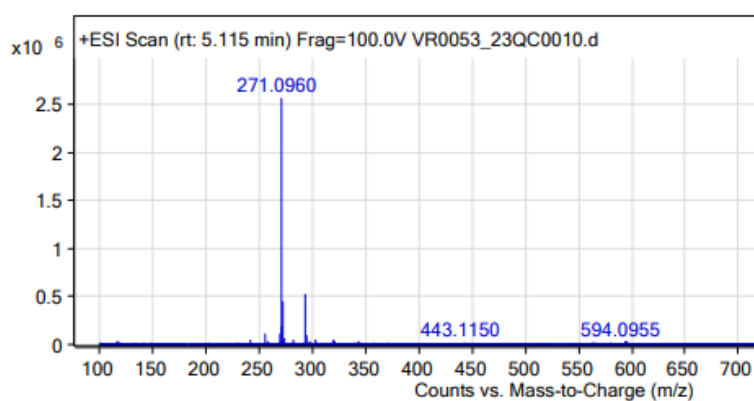

Figure S60: UV absorption spectrum of compound **22**

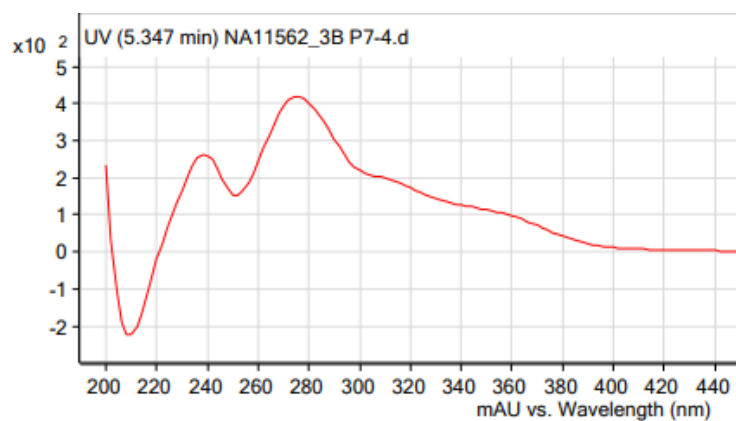

Figure S61: IR spectrum of compound **22**

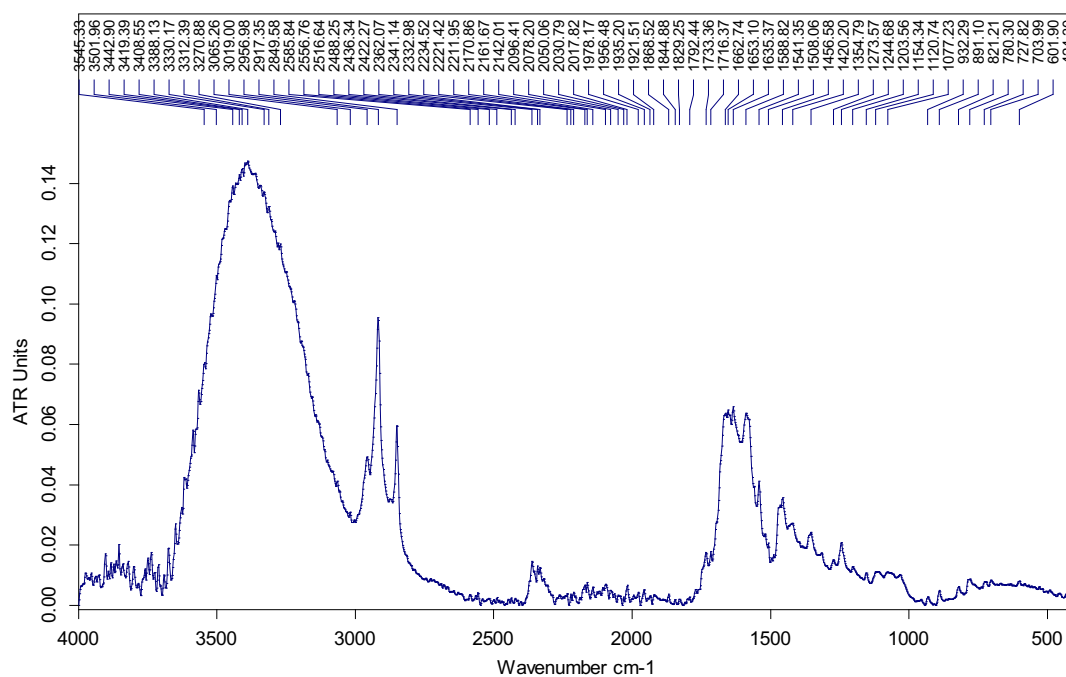



Figure S62:  $^1\text{H}$  NMR (400 MHz,  $\text{CDCl}_3$ ) spectrum of compound **22**

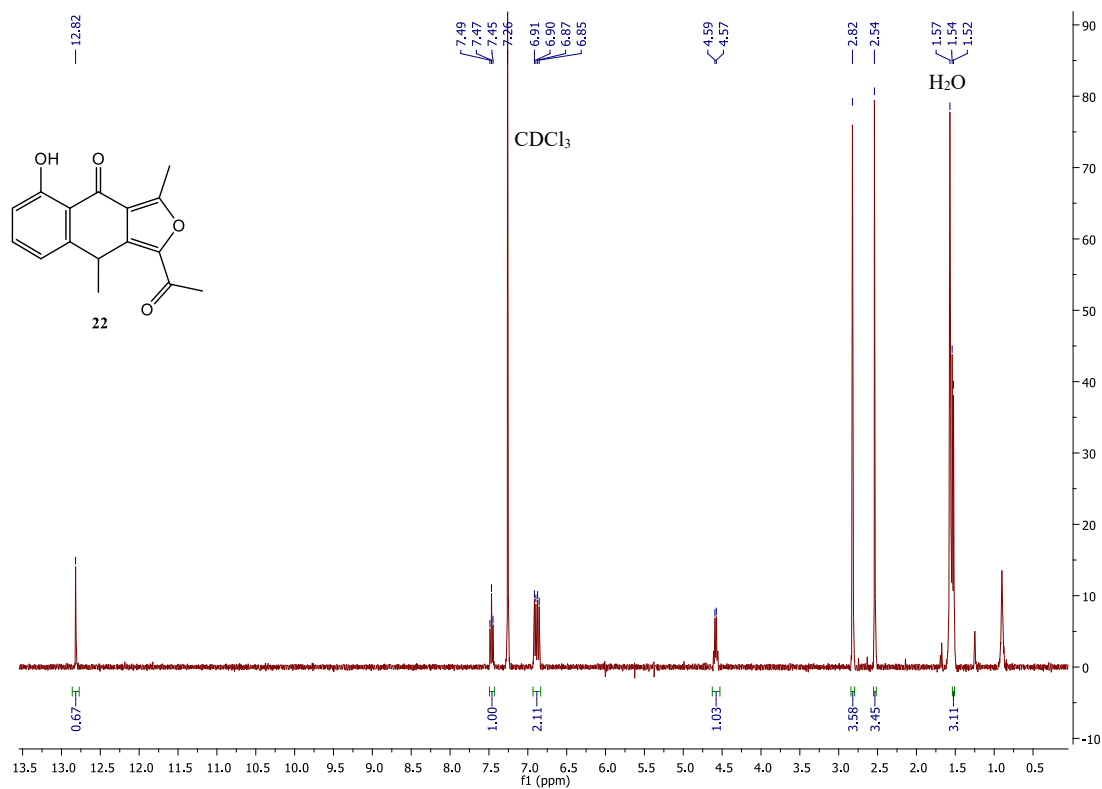

Figure S63:  $^1\text{H}$ - $^1\text{H}$  COSY (400 MHz,  $\text{CDCl}_3$ ) spectrum of compound **22**

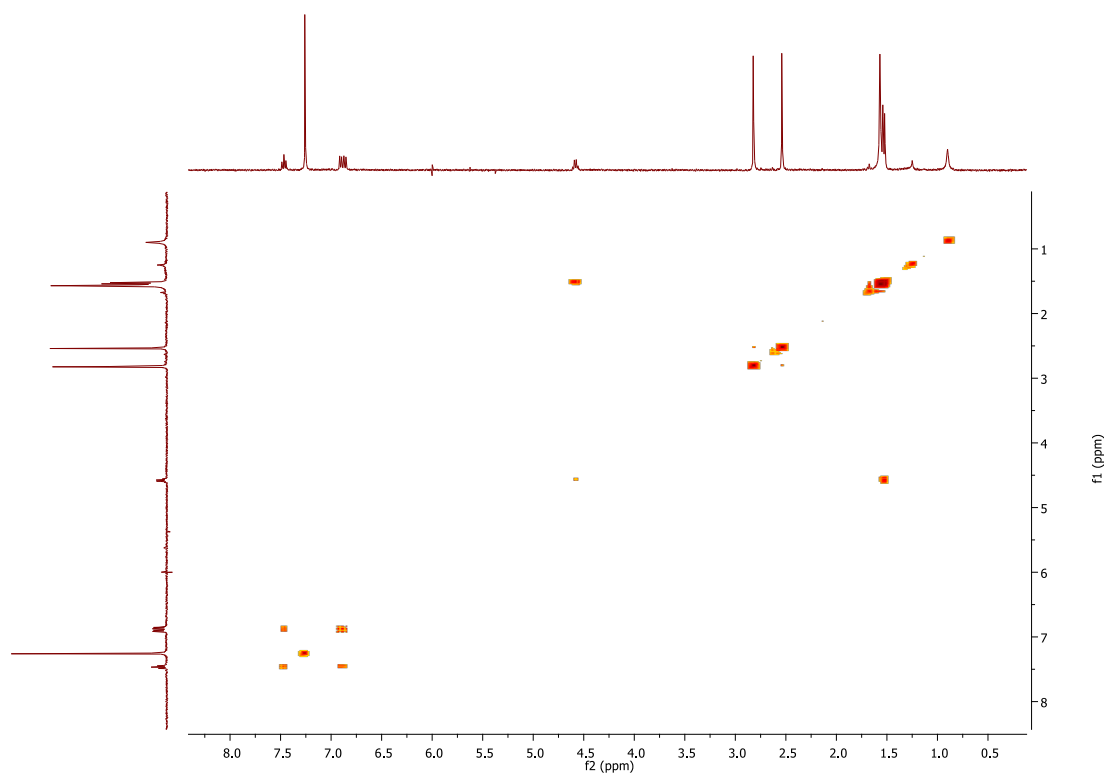

Figure S64a: gHMBC (400 MHz and 100MHz,  $\text{CDCl}_3$ ) spectrum of compound **22**

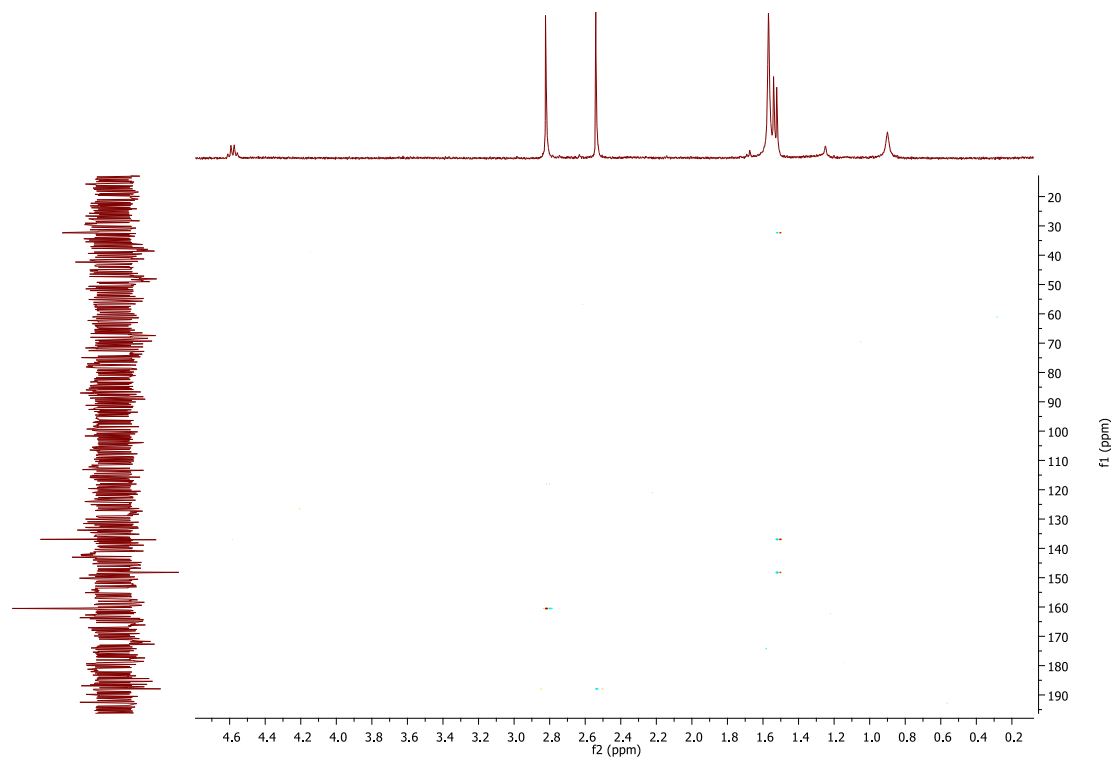

Figure S64b: gHMBC (400 MHz and 100MHz,  $\text{CDCl}_3$ ) spectrum of compound **22**

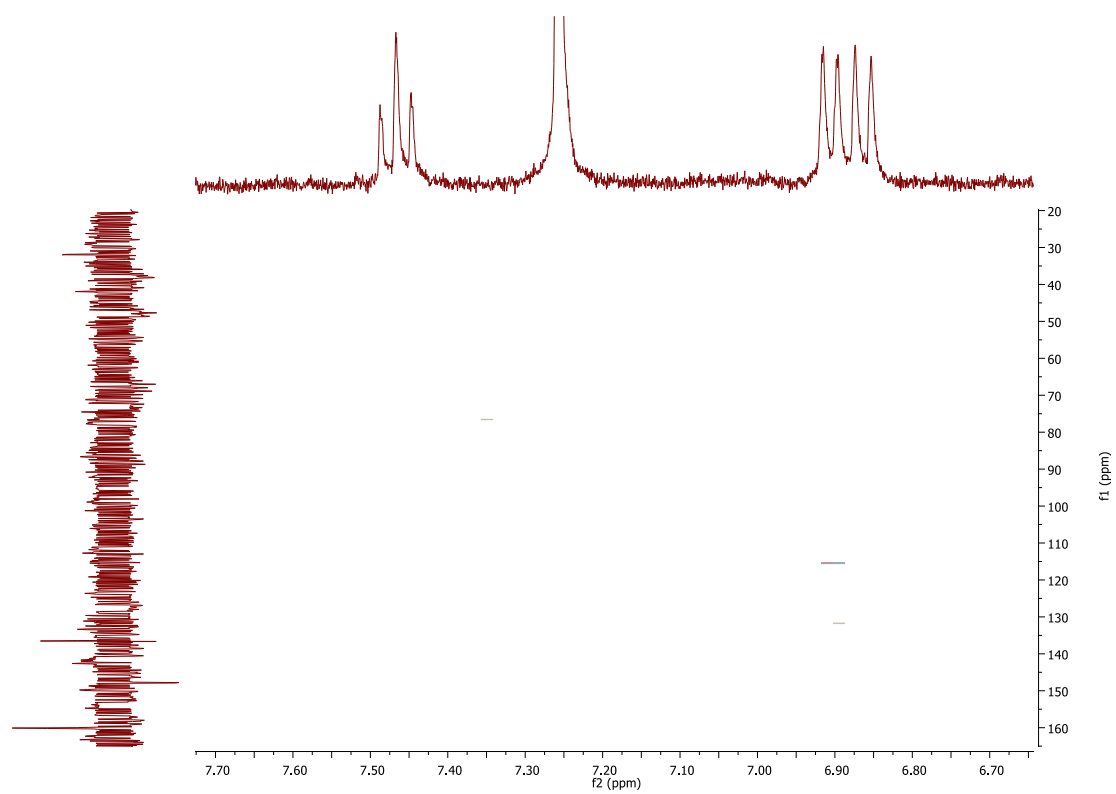

Figure S65: HRESIMS spectrum of compound **23**

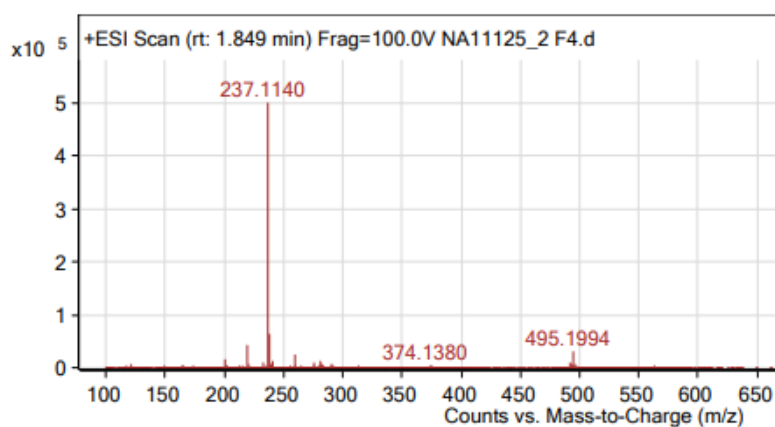

Figure S66: UV absorption spectrum of compound **23**

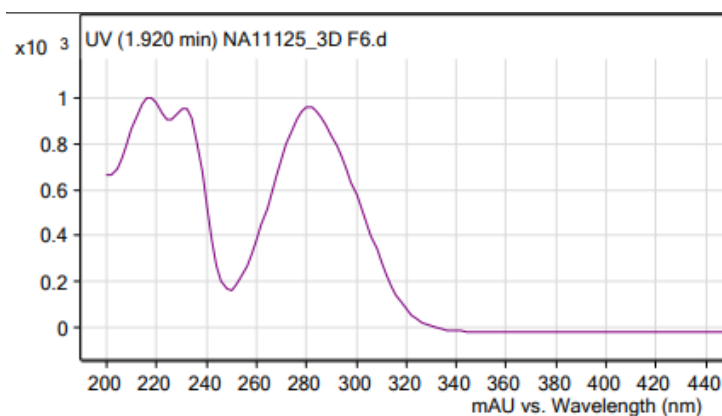

Figure S67: IR spectrum of compound **23**

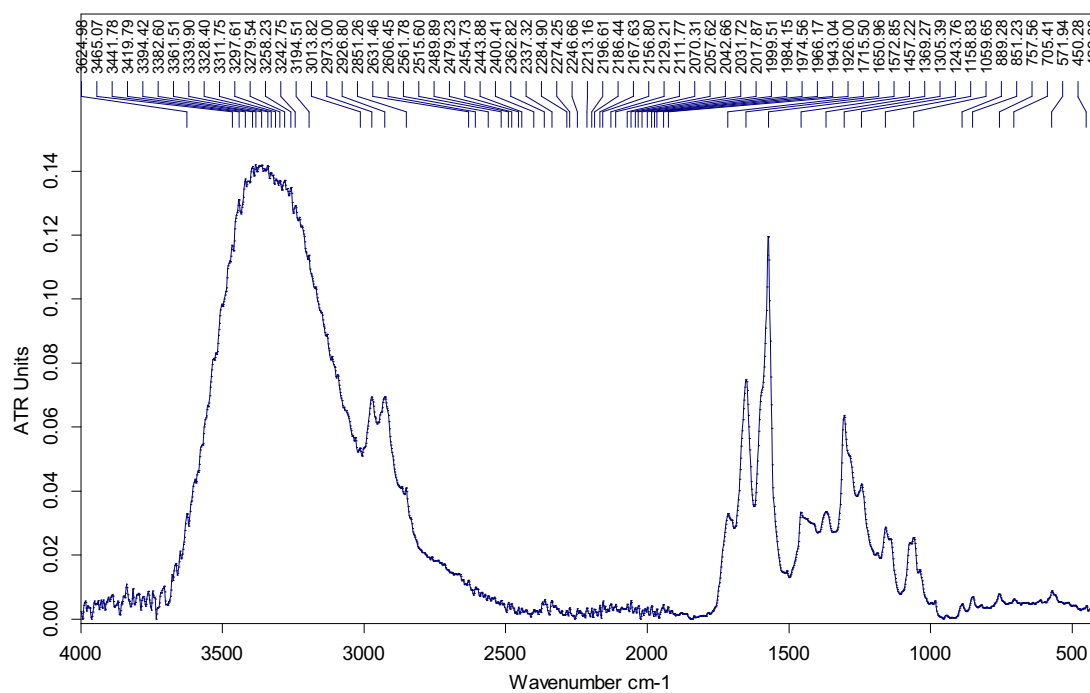

Figure S68:  $^1\text{H}$  NMR (400 MHz,  $\text{CDCl}_3 + \text{MeOH-}d_4$ ) spectrum of compound **23**

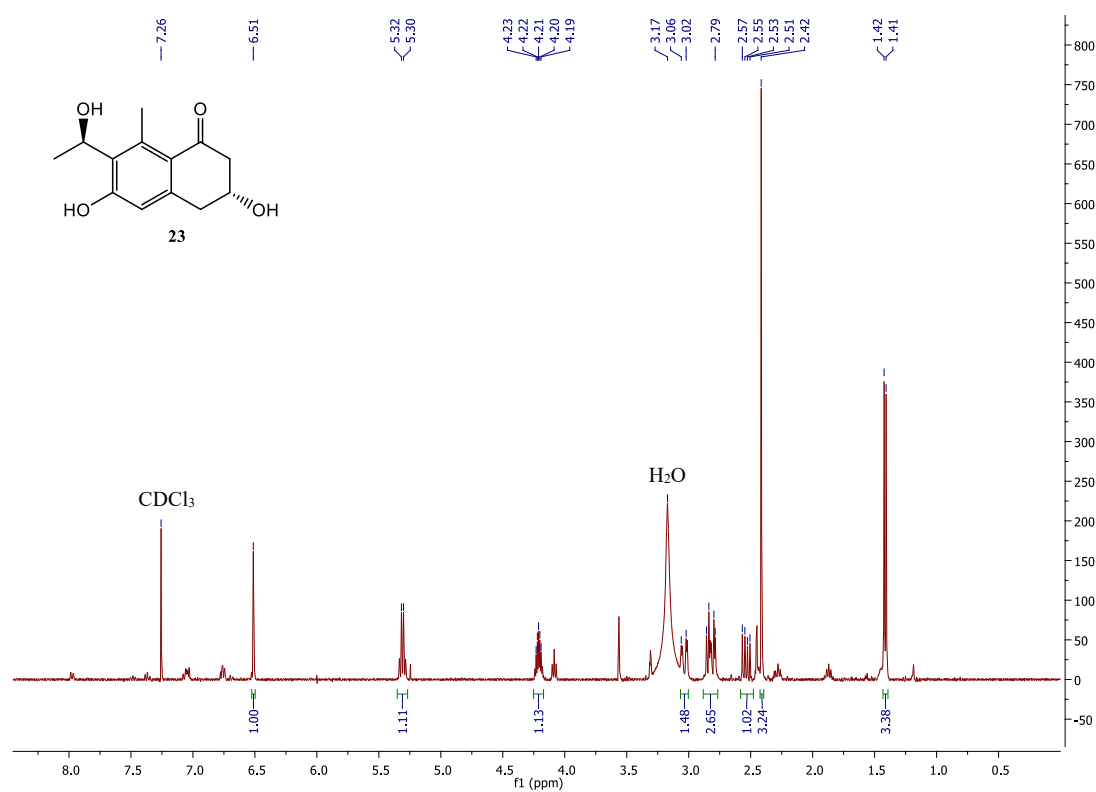

Figure S69:  $^{13}\text{C}$  NMR (100 MHz,  $\text{CDCl}_3 + \text{MeOH-}d_4$ ) spectrum of compound **23**

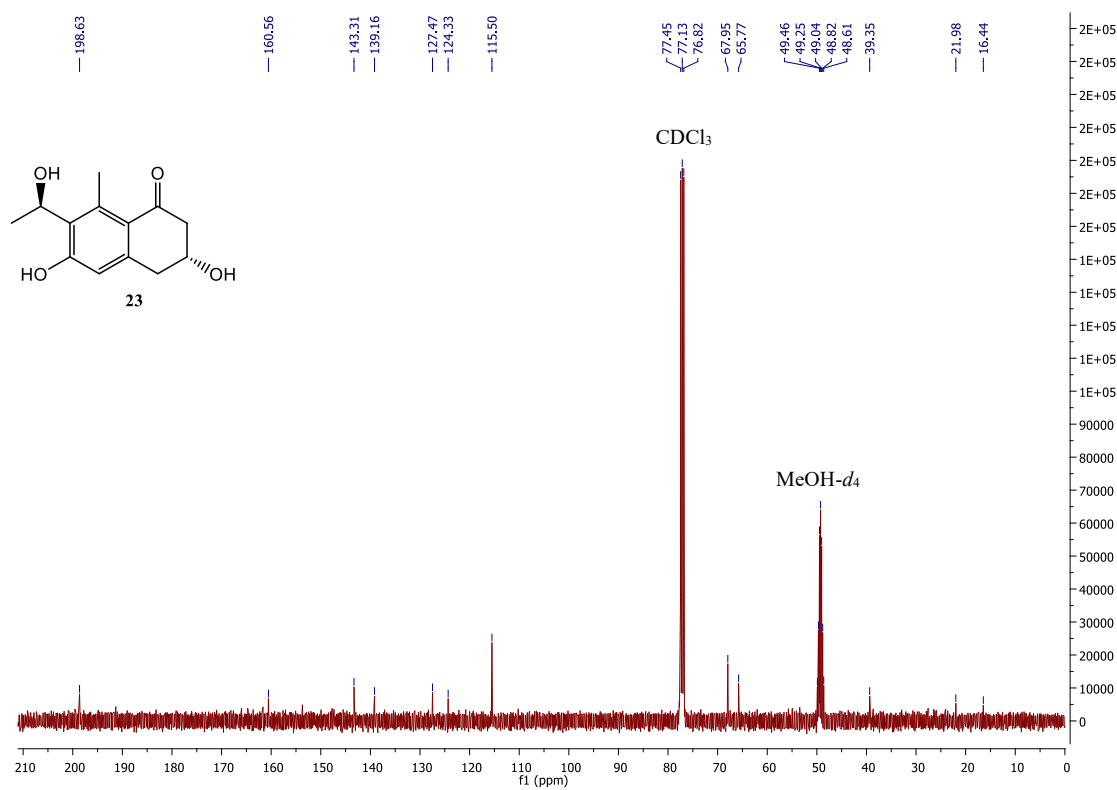

Figure S70:  $^1\text{H}$ - $^1\text{H}$  COSY (400 MHz,  $\text{CDCl}_3 + \text{MeOH-}d_4$ ) spectrum of compound **23**

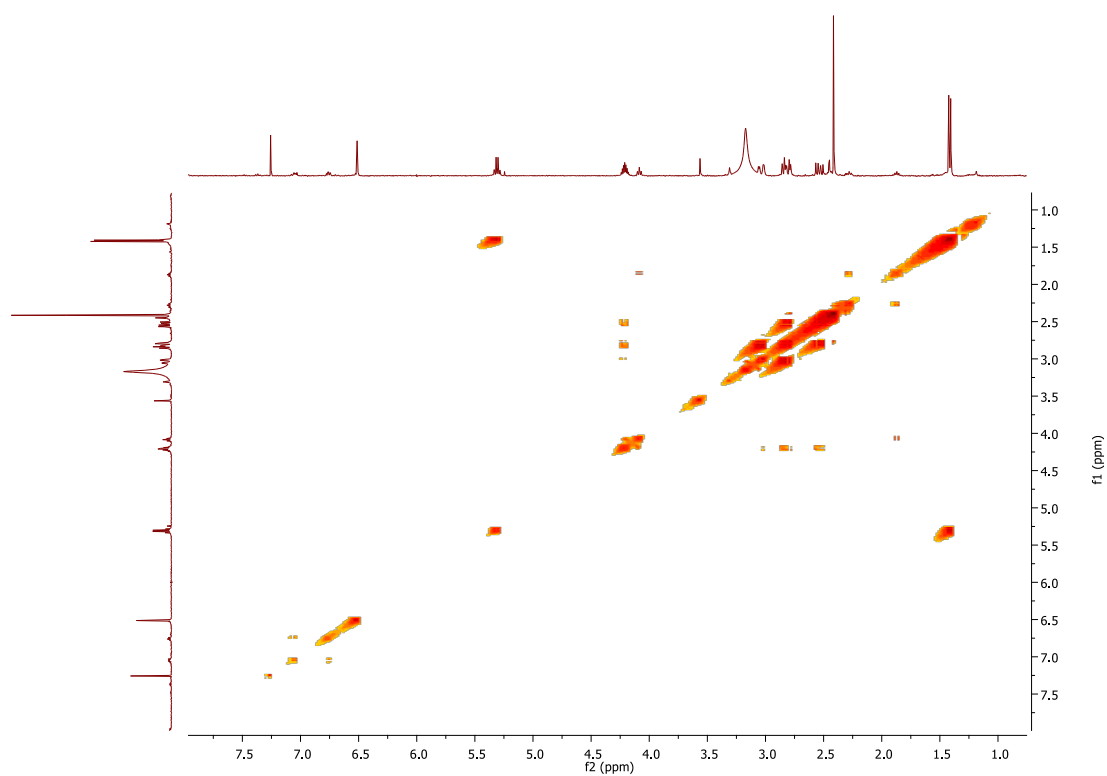

Figure S71: gHSQC (400 MHz and 100MHz,  $\text{CDCl}_3 + \text{MeOH-}d_4$ ) spectrum of compound **23**

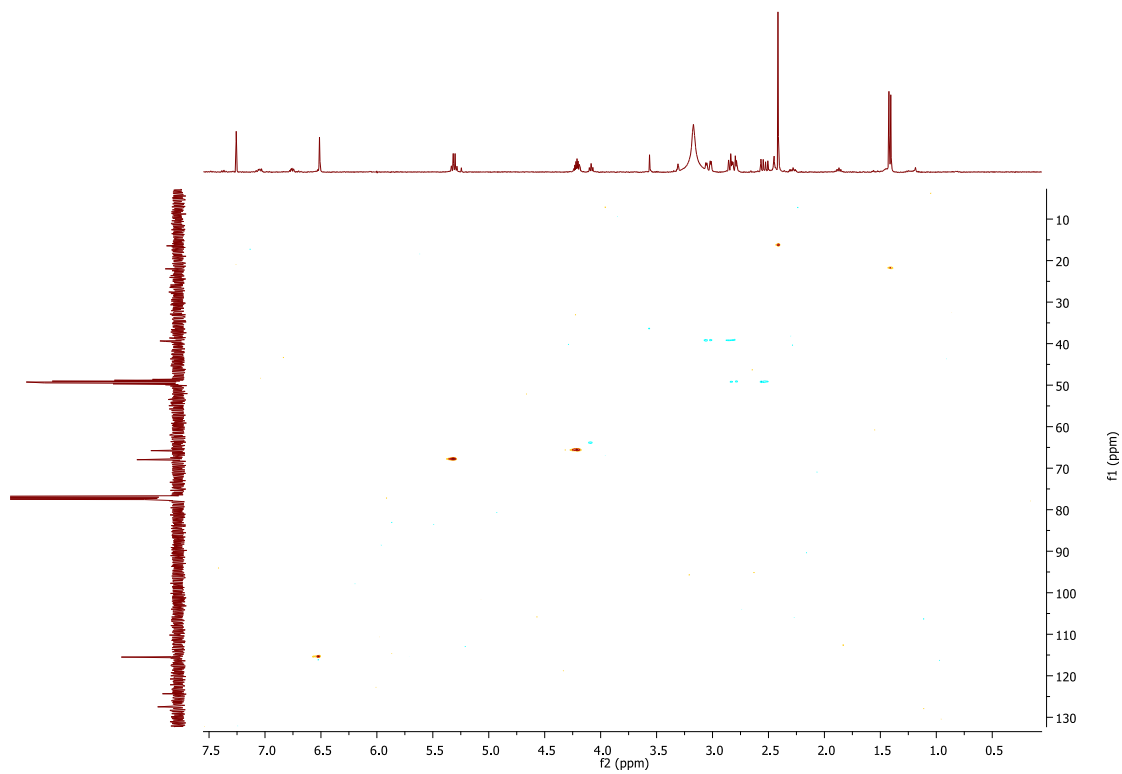

Figure S72: gHMBC (400 MHz and 100MHz, CDCl<sub>3</sub> + MeOH-*d*<sub>4</sub>) spectrum of compound **23**

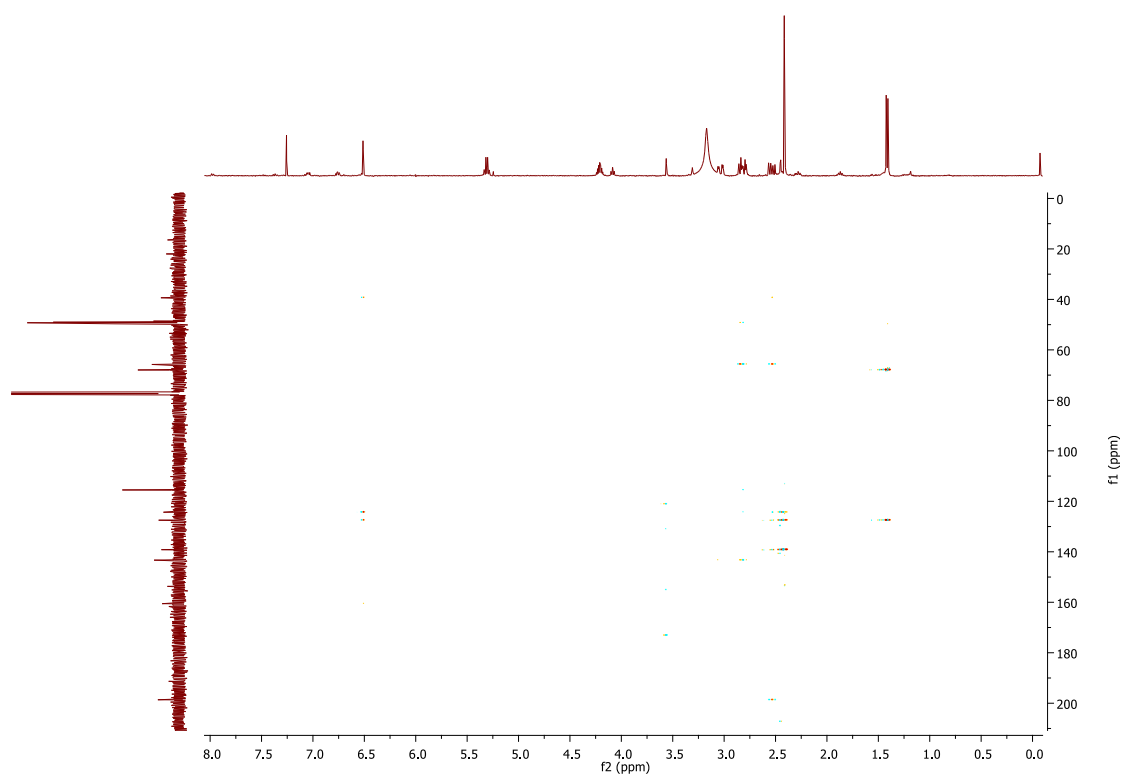

### 3. Computational section

#### 3.1. Computational details

All calculations were done following the general protocols previously described for J-DP4.<sup>1</sup> Conformational searches were done using the Mixed Torsional/Low Mode Sampling protocol in gas phase using the MMFF (as implemented in MacroModel)<sup>2</sup> force field and reoptimizing the conformers with AMBER and MM3 (as recommended in mix-J-DP4).<sup>3</sup> All conformers within 12 kJ/mol of the lowest energy conformer were subjected to NMR calculations. DFT calculations were performed using Gaussian 16.<sup>4</sup> Structure optimizations were done at the B3LYP/6-31G\* level of theory. Magnetic shielding constants ( $\sigma$ ) were calculated by means of the gauge including atomic orbitals (GIAO) method,<sup>5</sup> currently the most widely used to solve the gauge origin problem, at B3LYP/6-31G\*\* level as used in J-DP4. Unscaled chemical shifts ( $\delta_u$ ) were calculated using TMS as reference standard according to the following expression  $\delta_u = \sigma_0 - \sigma_x$ , where  $\sigma_x$  is the Boltzmann averaged shielding tensor (over all significantly populated conformations) and  $\sigma_0$  is the shielding tensor of TMS computed at the same level of theory used to calculate  $\sigma_x$ . Boltzmann averaging was done according to equation S1:

$$\sigma^x = \frac{\sum_i \sigma_i^x e^{(-E_i/RT)}}{\sum_i e^{(-E_i/RT)}}$$

(Equation S1)

where  $\sigma_i^x$  is the shielding constant for nucleus x in conformer i, R is the molar gas constant (8.3145 J/(K mol)), T is the temperature used for the calculation (298 K), and  $E_i$  is the relative energy of conformer i (to the lowest energy conformer) obtained from a single-point NMR calculation at the corresponding level of theory. The scaled chemical shifts ( $\delta_s$ ) were computed as  $\delta_s = (\delta_u - b)/m$ , where m and b are the slope and intercept, respectively, resulting from a linear regression calculation on a plot of  $\delta_u$  against  $\delta_{exp}$ .

- (1) Grimblat, N.; Gavín, J. A.; Hernández Daranas, A.; Sarotti, A. M. Combining the Power of J Coupling and DP4 Analysis on Stereochemical Assignments: The J-DP4 Methods. *Org. Lett.* 2019, 21 (11), 4003–4007.
- (2) Cuadrado C, Daranas AH, Sarotti AM. May the Force (Field) Be with You: On the Importance of Conformational Searches in the Prediction of NMR Chemical Shifts. *Mar Drugs* 2022; 20(11). e-pub ahead of print 2022/11/11; doi: 10.3390/md20110699
- (3) MacroModel Schrodinger release 2018-3; Schrodinger LLC: New York, 2018.
- (4) Gaussian 16, Revision C.01, M. J. Frisch, G. W. Trucks, H. B. Schlegel, G. E. Scuseria, M. A. Robb, J. R. Cheeseman, G. Scalmani, V. Barone, G. A. Petersson, H. Nakatsuji, X. Li, M. Caricato, A. V. Marenich, J. Bloino, B. G. Janesko, R. Gomperts, B. Mennucci, H. P. Hratchian, J. V. Ortiz, A. F. Izmaylov, J. L. Sonnenberg, D. Williams-Young, F. Ding, F. Lipparini, F. Egidi, J. Goings, B. Peng, A. Petrone, T. Henderson, D. Ranasinghe, V. G. Zakrzewski, J. Gao, N. Rega, G. Zheng, W. Liang, M. Hada, M. Ehara, K. Toyota, R. Fukuda, J. Hasegawa, M. Ishida, T. Nakajima, Y. Honda, O. Kitao, H. Nakai, T. Vreven, K. Throssell, J. A. Montgomery, Jr., J. E. Peralta, F. Ogliaro, M. J. Bearpark, J. J. Heyd, E. N. Brothers, K. N. Kudin, V. N. Staroverov, T. A. Keith, R. Kobayashi, J. Normand, K. Raghavachari, A. P. Rendell, J. C. Burant, S. S. Iyengar, J. Tomasi, M. Cossi, J. M. Millam, M. Klene, C. Adamo, R. Cammi, J. W. Ochterski, R. L. Martin, K. Morokuma, O. Farkas, J. B. Foresman, and D. J. Fox, Gaussian, Inc., Wallingford CT, 2016.
- (5) (a) Ditchfield, R. J. *Chem. Phys.* 1972, 56, 5688-5691. b) Ditchfield, R. *Mol. Phys.* 1974, 27, 789-807. c) Rohlfing, C. M.; Allen, L. C.; Ditchfield, R. *Chem. Phys.* 1984, 87, 9-15. d) Wolinski, K.; Hinton, J. F.; Pulay, P. *J. Am. Chem. Soc.* 1990, 112, 8251-8260.

### 3.2. Isomer studied for compound 23.

**Table S1.** Configuration of isomers studied for compound 23.

| Isomer   | Configuration |
|----------|---------------|
| Isomer 1 | 3R*, 9S*      |
| Isomer 2 | 3R*, 9R*      |

### 3.3. Experimental chemical shifts and isotropic magnetic shielding constants of studied isomers.

**Table S2.** Boltzmann averaged GIAO isotropic magnetic shielding constants ( $\sigma$ ) of isomers 1-2 calculated at the B3LYP/6-31G\*\* level of theory for compound 23.

| Isotropic shielding constants (AMBER) |              |          |          |
|---------------------------------------|--------------|----------|----------|
| Nuclei                                | Experimental | Isomer 1 | Isomer 2 |
| C 1                                   | 198.7        | 2.95     | 2.03     |
| C 2                                   | 49.4         | 142.84   | 141.15   |
| C 3                                   | 65.8         | 124.62   | 125.32   |
| C 4                                   | 39.4         | 151.27   | 152.97   |
| C 4a                                  | 143.3        | 50.48    | 51.73    |
| C 5                                   | 115.5        | 81.40    | 81.35    |
| C 6                                   | 160.6        | 36.49    | 36.55    |
| C 7                                   | 127.5        | 67.59    | 67.56    |
| C 8                                   | 139.2        | 51.65    | 52.86    |
| C 8a                                  | 124.3        | 68.54    | 68.27    |
| C 9                                   | 68.0         | 122.24   | 122.39   |
| C 10                                  | 22.0         | 169.77   | 169.84   |
| C 11                                  | 16.4         | 172.51   | 172.86   |
| H 2a                                  | 2.53         | 29.29    | 29.29    |
| H 2b                                  | 2.81         | 29.62    | 29.59    |
| H 3                                   | 4.21         | 27.73    | 27.73    |
| H 4a                                  | 3.03         | 29.03    | 28.90    |
| H 4b                                  | 2.83         | 29.13    | 29.07    |
| H 5                                   | 6.51         | 25.31    | 25.29    |
| H 9                                   | 5.31         | 26.55    | 26.56    |
| H 10a-c                               | 1.42         | 30.37    | 30.36    |
| H 11a-c                               | 2.42         | 29.64    | 29.71    |
| J 2a,3                                | 8            | 3.71     | 7.88     |
| J 2b,3                                | 4            | 8.11     | 3.61     |
| J 4a,3                                | 8            | 3.38     | 7.45     |
| J 4b,3                                | 4            | 7.67     | 3.92     |



| Isotropic shielding constants (MM3) |              |          |          |
|-------------------------------------|--------------|----------|----------|
| Nuclei                              | Experimental | Isomer 1 | Isomer 2 |
| C 1                                 | 198.7        | 6.19     | 6.36     |
| C 2                                 | 49.4         | 141.27   | 139.86   |
| C 3                                 | 65.8         | 121.81   | 122.63   |
| C 4                                 | 39.4         | 147.97   | 147.92   |
| C 4a                                | 143.3        | 52.37    | 52.75    |
| C 5                                 | 115.5        | 79.7     | 79.31    |
| C 6                                 | 160.6        | 39.26    | 39.26    |
| C 7                                 | 127.5        | 70.24    | 70.09    |
| C 8                                 | 139.2        | 53.92    | 53.89    |
| C 8a                                | 124.3        | 70.33    | 70.68    |
| C 9                                 | 68.0         | 120.9    | 120.9    |
| C 10                                | 22.0         | 166.56   | 166.6    |
| C 11                                | 16.4         | 169.37   | 169.32   |
|                                     |              |          |          |
| H 2a                                | 2.53         | 28.65    | 28.8     |
| H 2b                                | 2.81         | 29.03    | 28.87    |
| H 3                                 | 4.21         | 27.33    | 27.36    |
| H 4a                                | 3.03         | 28.44    | 28.34    |
| H 4b                                | 2.83         | 28.51    | 28.51    |
| H 5                                 | 6.51         | 24.98    | 24.95    |
| H 9                                 | 5.31         | 26.07    | 26.07    |
| H 10a-c                             | 1.42         | 29.81    | 29.8     |
| H 11a-c                             | 2.42         | 29.05    | 29.05    |
|                                     |              |          |          |
| J 2a,3                              | 8            | 3.9      | 9.13     |
| J 2b,3                              | 4            | 8.12     | 3.7      |
| J 4a,3                              | 8            | 3.41     | 8.39     |
| J 4b,3                              | 4            | 7.79     | 3.9      |

| Isotropic shielding constants (MMFF) |              |          |          |
|--------------------------------------|--------------|----------|----------|
| Nuclei                               | Experimental | Isomer 1 | Isomer 2 |
| C 1                                  | 198.7        | 0.76     | 0.65     |
| C 2                                  | 49.4         | 144.36   | 142.86   |
| C 3                                  | 65.8         | 124.51   | 125.1    |
| C 4                                  | 39.4         | 151.44   | 152.93   |
| C 4a                                 | 143.3        | 51.91    | 52.77    |
| C 5                                  | 115.5        | 79.14    | 78.96    |
| C 6                                  | 160.6        | 37.33    | 37.35    |
| C 7                                  | 127.5        | 70.24    | 70.2     |
| C 8                                  | 139.2        | 51.47    | 52.17    |
| C 8a                                 | 124.3        | 68.5     | 68.47    |
| C 9                                  | 68.0         | 120.19   | 120.23   |
| C 10                                 | 22.0         | 169.36   | 169.35   |
| C 11                                 | 16.4         | 171.98   | 172.16   |
|                                      |              |          |          |
| H 2a                                 | 2.53         | 29.14    | 29.1     |
| H 2b                                 | 2.81         | 29.36    | 29.43    |
| H 3                                  | 4.21         | 27.55    | 27.56    |
| H 4a                                 | 3.03         | 28.85    | 28.7     |
| H 4b                                 | 2.83         | 28.95    | 28.91    |
| H 5                                  | 6.51         | 25.08    | 25.06    |
| H 9                                  | 5.31         | 26.38    | 26.39    |
| H 10a-c                              | 1.42         | 30.25    | 30.25    |
| H 11a-c                              | 2.42         | 29.46    | 29.49    |
|                                      |              |          |          |
| J 2a,3                               | 8            | 4.48     | 7.95     |
| J 2b,3                               | 4            | 9.34     | 4.07     |
| J 4a,3                               | 8            | 3.84     | 7.2      |
| J 4b,3                               | 4            | 8.68     | 4.03     |

### 3.4. Mix-J-DP4 results

**Table S3.** Mix-J-DP4 (AMBER) results obtained using experimental data of compound **23** *versus* isomers 1-2.

| Settings              |          | Type of data (shifts) |        | Default settings    |           |       |         |   |   |   | Custom settings     |          |           |         | Most Likely Isomers |                 |             |        |
|-----------------------|----------|-----------------------|--------|---------------------|-----------|-------|---------|---|---|---|---------------------|----------|-----------|---------|---------------------|-----------------|-------------|--------|
| Default               |          | Shielding tensors     |        |                     |           |       |         |   |   |   |                     |          |           |         | Rank                | Isomer          | Probability |        |
|                       |          |                       |        | TMS                 | $\sigma$  | $\nu$ |         |   |   |   | TMS                 | $\sigma$ | $\nu$     |         |                     |                 |             |        |
|                       |          |                       |        | H                   | 31.830573 | 0.185 | 14.18   |   |   |   |                     | H        | 31.830573 | 0.185   | 14.18               | 1 <sup>st</sup> | 2           | 100.00 |
|                       |          |                       |        | C                   | 192.29325 | 2.306 | 11.38   |   |   |   |                     | C        | 192.29325 | 2.306   | 11.38               | 2 <sup>nd</sup> | 1           | 0.00   |
|                       |          |                       |        | J                   | -         | 0.992 | 3.06    |   |   |   |                     | J        | -         | 0.992   | 3.06                | 3 <sup>rd</sup> | -           | -      |
|                       |          |                       |        | Slope scaling J     |           |       | 0.9509  |   |   |   | Slope scaling J     |          |           | 0.9509  |                     |                 |             |        |
|                       |          |                       |        | Intercept scaling J |           |       | -0.1405 |   |   |   | Intercept scaling J |          |           | -0.1405 |                     |                 |             |        |
| Isomer N <sup>o</sup> |          | 1                     | 2      | 3                   | 4         | 5     | 6       | 7 | 8 | 9 | 10                  | 11       | 12        | 13      | 14                  | 15              |             |        |
| DP4 (%)               | H        | 52.20                 | 47.80  | -                   | -         | -     | -       | - | - | - | -                   | -        | -         | -       | -                   | -               |             |        |
|                       | C        | 11.36                 | 88.64  | -                   | -         | -     | -       | - | - | - | -                   | -        | -         | -       | -                   | -               |             |        |
|                       | H+C      | 12.28                 | 87.72  | -                   | -         | -     | -       | - | - | - | -                   | -        | -         | -       | -                   | -               |             |        |
|                       | J        | 0.00                  | 100.00 | -                   | -         | -     | -       | - | - | - | -                   | -        | -         | -       | -                   | -               |             |        |
|                       | all data | 0.00                  | 100.00 | -                   | -         | -     | -       | - | - | - | -                   | -        | -         | -       | -                   | -               |             |        |
| Type                  | Exp      | 1                     | 2      | 3                   | 4         | 5     | 6       | 7 | 8 | 9 | 10                  | 11       | 12        | 13      | 14                  | 15              |             |        |

**Table S4.** Mix-J-DP4 (MM3) results obtained using experimental data of compound **23** *versus* isomers 1-2.

| Settings              |          | Type of data (shifts) |        | Default settings    |           |       |         |   |           |       | Custom settings     |                 |    |         | Most Likely Isomers |        |             |
|-----------------------|----------|-----------------------|--------|---------------------|-----------|-------|---------|---|-----------|-------|---------------------|-----------------|----|---------|---------------------|--------|-------------|
| Default               |          | Shielding tensors     |        |                     |           |       |         |   |           |       |                     |                 |    |         | Rank                | Isomer | Probability |
|                       |          |                       |        | TMS                 |           |       |         |   |           |       | TMS                 |                 |    |         |                     |        |             |
|                       |          |                       |        | H                   | 31.830573 | 0.185 | 14.18   | H | 31.830573 | 0.185 | 14.18               | 1 <sup>st</sup> | 2  | 100.00  |                     |        |             |
|                       |          |                       |        | C                   | 192.29325 | 2.306 | 11.38   | C | 192.29325 | 2.306 | 11.38               | 2 <sup>nd</sup> | 1  | 0.00    |                     |        |             |
|                       |          |                       |        | J                   | -         | 0.992 | 3.06    | J | -         | 0.992 | 3.06                | 3 <sup>rd</sup> | -  | -       |                     |        |             |
|                       |          |                       |        | Slope scaling J     |           |       | 0.9509  |   |           |       | Slope scaling J     |                 |    | 0.9509  |                     |        |             |
|                       |          |                       |        | Intercept scaling J |           |       | -0.1405 |   |           |       | Intercept scaling J |                 |    | -0.1405 |                     |        |             |
|                       |          |                       |        |                     |           |       |         |   |           |       |                     |                 |    |         |                     |        |             |
| Isomer N <sup>o</sup> |          | 1                     | 2      | 3                   | 4         | 5     | 6       | 7 | 8         | 9     | 10                  | 11              | 12 | 13      | 14                  | 15     |             |
| DP4 (%)               | H        | 8.15                  | 91.85  | -                   | -         | -     | -       | - | -         | -     | -                   | -               | -  | -       | -                   | -      |             |
|                       | C        | 14.60                 | 85.40  | -                   | -         | -     | -       | - | -         | -     | -                   | -               | -  | -       | -                   | -      |             |
|                       | H+C      | 1.49                  | 98.51  | -                   | -         | -     | -       | - | -         | -     | -                   | -               | -  | -       | -                   | -      |             |
|                       | J        | 0.00                  | 100.00 | -                   | -         | -     | -       | - | -         | -     | -                   | -               | -  | -       | -                   | -      |             |
|                       | all data | 0.00                  | 100.00 | -                   | -         | -     | -       | - | -         | -     | -                   | -               | -  | -       | -                   | -      |             |
| Type                  | Exp      | 1                     | 2      | 3                   | 4         | 5     | 6       | 7 | 8         | 9     | 10                  | 11              | 12 | 13      | 14                  | 15     |             |

**Table S5.** Mix-J-DP4 (MMFF) results obtained using experimental data of compound **23** *versus* isomers 1-2.

| Settings              |          | Type of data (shifts) |        | Default settings    |           |       |         |   |   |   | Custom settings |                     |           |       | Most Likely Isomers |                 |             |        |
|-----------------------|----------|-----------------------|--------|---------------------|-----------|-------|---------|---|---|---|-----------------|---------------------|-----------|-------|---------------------|-----------------|-------------|--------|
| Default               |          | Shielding tensors     |        |                     |           |       |         |   |   |   |                 |                     |           |       | Rank                | Isomer          | Probability |        |
|                       |          |                       |        | TMS                 | $\sigma$  | $\nu$ |         |   |   |   | TMS             | $\sigma$            | $\nu$     |       |                     |                 |             |        |
|                       |          |                       |        | H                   | 31.830573 | 0.185 | 14.18   |   |   |   |                 | H                   | 31.830573 | 0.185 | 14.18               | 1 <sup>st</sup> | 2           | 100.00 |
|                       |          |                       |        | C                   | 192.29325 | 2.306 | 11.38   |   |   |   |                 | C                   | 192.29325 | 2.306 | 11.38               | 2 <sup>nd</sup> | 1           | 0.00   |
|                       |          |                       |        | J                   | -         | 0.992 | 3.06    |   |   |   |                 | J                   | -         | 0.992 | 3.06                | 3 <sup>rd</sup> | -           | -      |
|                       |          |                       |        | Slope scaling J     |           |       | 0.9509  |   |   |   |                 | Slope scaling J     |           |       | 0.9509              |                 |             |        |
|                       |          |                       |        | Intercept scaling J |           |       | -0.1405 |   |   |   |                 | Intercept scaling J |           |       | -0.1405             |                 |             |        |
| Isomer N <sup>o</sup> |          | 1                     | 2      | 3                   | 4         | 5     | 6       | 7 | 8 | 9 | 10              | 11                  | 12        | 13    | 14                  | 15              |             |        |
| DP4 (%)               | H        | 77.12                 | 22.88  | -                   | -         | -     | -       | - | - | - | -               | -                   | -         | -     | -                   | -               |             |        |
|                       | C        | 22.17                 | 77.83  | -                   | -         | -     | -       | - | - | - | -               | -                   | -         | -     | -                   | -               |             |        |
|                       | H+C      | 48.99                 | 51.01  | -                   | -         | -     | -       | - | - | - | -               | -                   | -         | -     | -                   | -               |             |        |
|                       | J        | 0.00                  | 100.00 | -                   | -         | -     | -       | - | - | - | -               | -                   | -         | -     | -                   | -               |             |        |
|                       | all data | 0.00                  | 100.00 | -                   | -         | -     | -       | - | - | - | -               | -                   | -         | -     | -                   | -               |             |        |
| Type                  | Exp      | 1                     | 2      | 3                   | 4         | 5     | 6       | 7 | 8 | 9 | 10              | 11                  | 12        | 13    | 14                  | 15              |             |        |

### 3.5. CMAE for $^1\text{H}$ and $^{13}\text{C}$ for the isomers of compounds **23**.

**Table S6.** CMAE values for isomers of compound **23** computed at the B3LYP/6-31G\*\* level of theory, using AMBER as force field.

|                | Absoluted Error Scaled |            |
|----------------|------------------------|------------|
|                | Isomer1                | Isomer2    |
| C 1            | 3.57                   | 2.58       |
| C 2            | 1.43                   | 0.64       |
| C 3            | 1.34                   | 0.86       |
| C 4            | 0.30                   | 1.77       |
| C 4a           | 1.83                   | 0.63       |
| C 5            | 2.90                   | 2.67       |
| C 6            | 0.76                   | 0.73       |
| C 7            | 0.37                   | 0.19       |
| C 8            | 4.70                   | 3.55       |
| C 8a           | 1.83                   | 2.27       |
| C 9            | 1.64                   | 1.74       |
| C 10           | 2.36                   | 2.09       |
| C 11           | 0.36                   | 0.34       |
| <b>Average</b> | <b>1.8</b>             | <b>1.5</b> |
| H 2a           | 0.17                   | 0.15       |
| H 2b           | 0.43                   | 0.42       |
| H 3            | 0.01                   | 0.01       |
| H 4a           | 0.07                   | 0.03       |
| H 4b           | 0.03                   | 0.07       |
| H 5            | 0.06                   | 0.06       |
| H 9            | 0.05                   | 0.03       |
| H 10a-c        | 0.23                   | 0.22       |
| H 11a-c        | 0.06                   | 0.14       |
| <b>Average</b> | <b>0.1</b>             | <b>0.1</b> |

**Table S7.** CMAE values for isomers of compound **23** computed at the B3LYP/6-31G\*\* level of theory, using MM3 as force field.

|                | Absoluted Error Scaled |            |
|----------------|------------------------|------------|
|                | Isomer1                | Isomer2    |
| C 1            | 2.84                   | 2.85       |
| C 2            | 2.21                   | 0.79       |
| C 3            | 2.81                   | 1.81       |
| C 4            | 0.42                   | 0.32       |
| C 4a           | 1.73                   | 1.39       |
| C 5            | 0.55                   | 0.11       |
| C 6            | 1.14                   | 1.03       |
| C 7            | 2.14                   | 1.94       |
| C 8            | 4.13                   | 4.23       |
| C 8a           | 0.97                   | 0.61       |
| C 9            | 1.61                   | 1.52       |
| C 10           | 2.64                   | 2.88       |
| C 11           | 0.14                   | 0.28       |
| <b>Average</b> | <b>1.8</b>             | <b>1.5</b> |
| H 2a           | 0.24                   | 0.07       |
| H 2b           | 0.43                   | 0.28       |
| H 3            | 0.08                   | 0.13       |
| H 4a           | 0.04                   | 0.05       |
| H 4b           | 0.08                   | 0.07       |
| H 5            | 0.03                   | 0.04       |
| H 9            | 0.11                   | 0.09       |
| H 10a-c        | 0.16                   | 0.16       |
| H 11a-c        | 0.06                   | 0.07       |
| <b>Average</b> | <b>0.1</b>             | <b>0.1</b> |

**Table S8.** CMAE values for isomers of compound **23** computed at the B3LYP/6-31G\*\* level of theory, using MMFF as force field.

|                | Absoluted Error Scaled |                |
|----------------|------------------------|----------------|
|                | <b>Isomer1</b>         | <b>Isomer2</b> |
| C 1            | 1.41                   | 1.12           |
| C 2            | 3.10                   | 1.37           |
| C 3            | 1.37                   | 0.91           |
| C 4            | 0.54                   | 1.95           |
| C 4a           | 0.21                   | 0.53           |
| C 5            | 0.62                   | 0.27           |
| C 6            | 1.76                   | 1.61           |
| C 7            | 3.27                   | 3.06           |
| C 8            | 4.77                   | 4.20           |
| C 8a           | 1.76                   | 1.96           |
| C 9            | 3.71                   | 3.83           |
| C 10           | 1.98                   | 1.82           |
| C 11           | 0.86                   | 0.82           |
| <b>Average</b> | <b>2.0</b>             | <b>1.8</b>     |
| H 2a           | 0.15                   | 0.17           |
| H 2b           | 0.34                   | 0.42           |
| H 3            | 0.00                   | 0.03           |
| H 4a           | 0.07                   | 0.06           |
| H 4b           | 0.03                   | 0.06           |
| H 5            | 0.07                   | 0.08           |
| H 9            | 0.02                   | 0.00           |
| H 10a-c        | 0.19                   | 0.18           |
| H 11a-c        | 0.05                   | 0.09           |
| <b>Average</b> | <b>0.1</b>             | <b>0.1</b>     |

### 3.6. Correlation plots of compound 23.

**Figure S73.** Compound **23** correlation plots between isotropic magnetic shielding and experimental chemical shift for  $^{13}\text{C}$  and  $^1\text{H}$  for the most probable isomer computed at B3LYP/6-31G\*\* level of theory, using AMBER.

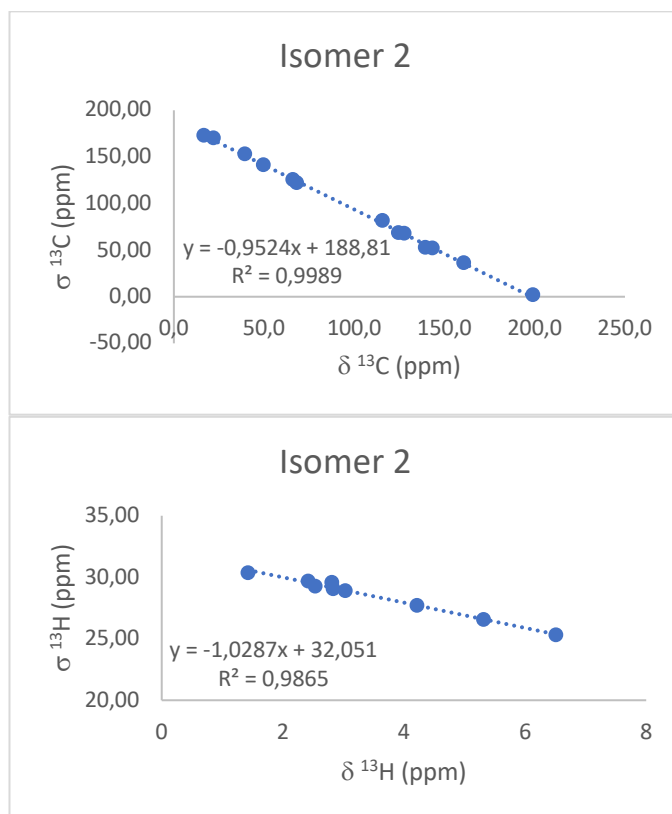

**Figure S74.** Compound **23** correlation plots between isotropic magnetic shielding and experimental chemical shift for  $^{13}\text{C}$  and  $^1\text{H}$  for the most probable isomer computed at B3LYP/6-31G\*\* level of theory, using MM3.

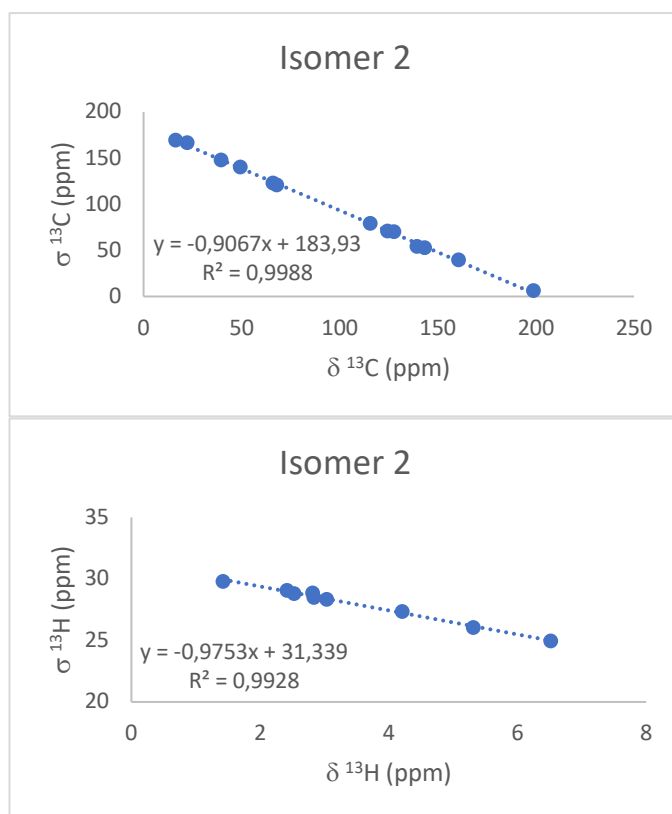

**Figure S75.** Compound **23** correlation plots between isotropic magnetic shielding and experimental chemical shift for  $^{13}\text{C}$  and  $^1\text{H}$  for the most probable isomer computed at B3LYP/6-31G\*\* level of theory, using MMFF.

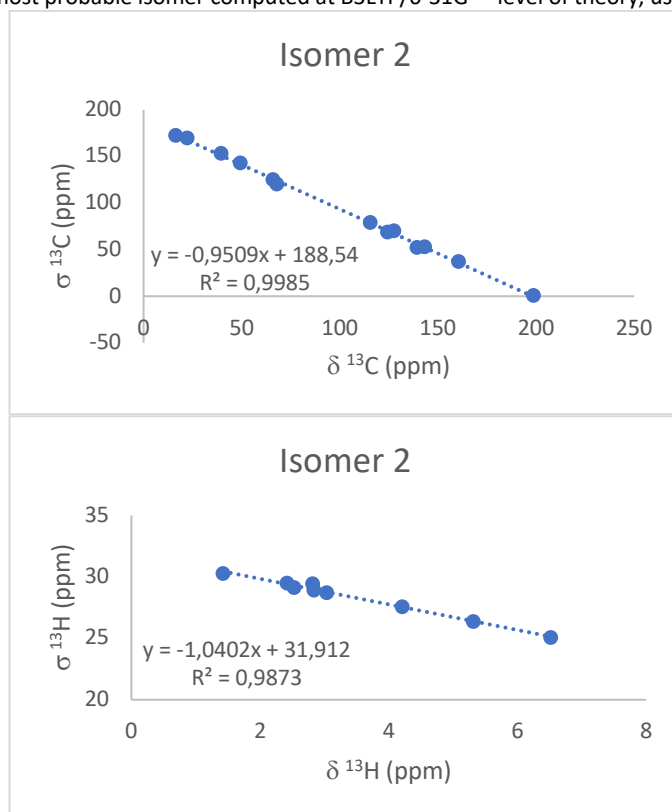

### 3.7. SCF energies of compound 23.

**Table S9.** SCF energies (Hartree) computed at B3LYP/6-31G\*\* level of theory, using AMBER as force field, for the coordinate files of compound 23.

| Name                          | Energy (Hartree) |
|-------------------------------|------------------|
| 01-Compound23-RS_miniAMBER_1  | -805.9311170     |
| 01-Compound23-RS_miniAMBER_10 | -805.9368753     |
| 01-Compound23-RS_miniAMBER_2  | -805.9329078     |
| 01-Compound23-RS_miniAMBER_3  | -805.9328140     |
| 01-Compound23-RS_miniAMBER_4  | -805.9338721     |
| 01-Compound23-RS_miniAMBER_5  | -805.9336763     |
| 01-Compound23-RS_miniAMBER_6  | -805.9367073     |
| 01-Compound23-RS_miniAMBER_7  | -805.9330901     |
| 01-Compound23-RS_miniAMBER_8  | -805.9358657     |
| 01-Compound23-RS_miniAMBER_9  | -805.9371970     |
| 02-Compound23-RR_miniAMBER_11 | -805.9311850     |
| 02-Compound23-RR_miniAMBER_12 | -805.9311981     |
| 02-Compound23-RR_miniAMBER_13 | -805.9330584     |
| 02-Compound23-RR_miniAMBER_14 | -805.9343149     |
| 02-Compound23-RR_miniAMBER_15 | -805.9337675     |
| 02-Compound23-RR_miniAMBER_16 | -805.9344043     |
| 02-Compound23-RR_miniAMBER_17 | -805.9332122     |
| 02-Compound23-RR_miniAMBER_18 | -805.9360618     |
| 02-Compound23-RR_miniAMBER_19 | -805.9369033     |
| 02-Compound23-RR_miniAMBER_20 | -805.9328128     |



**Table S10.** SCF energies (Hartree) computed at B3LYP/6-31G\*\* level of theory, using MM3 as force field, for the coordinate files of compound **23**.

| Name                        | Energy (Hartree) |
|-----------------------------|------------------|
| 01-Compound23-RS_miniMM3_1  | -805.92981769    |
| 01-Compound23-RS_miniMM3_10 | -805.93409913    |
| 01-Compound23-RS_miniMM3_2  | -805.93422714    |
| 01-Compound23-RS_miniMM3_3  | -805.93107974    |
| 01-Compound23-RS_miniMM3_4  | -805.93392135    |
| 01-Compound23-RS_miniMM3_5  | -805.93410759    |
| 01-Compound23-RS_miniMM3_6  | -805.93421556    |
| 01-Compound23-RS_miniMM3_7  | -805.93320025    |
| 01-Compound23-RS_miniMM3_8  | -805.93323595    |
| 01-Compound23-RS_miniMM3_9  | -805.93392428    |
| 02-Compound23-RR_miniMM3_11 | -805.93292794    |
| 02-Compound23-RR_miniMM3_12 | -805.93215421    |
| 02-Compound23-RR_miniMM3_13 | -805.93349179    |
| 02-Compound23-RR_miniMM3_14 | -805.93291770    |
| 02-Compound23-RR_miniMM3_15 | -805.93433168    |
| 02-Compound23-RR_miniMM3_16 | -805.93220547    |
| 02-Compound23-RR_miniMM3_17 | -805.93398134    |
| 02-Compound23-RR_miniMM3_18 | -805.93348933    |
| 02-Compound23-RR_miniMM3_19 | -805.93434654    |
| 02-Compound23-RR_miniMM3_20 | -805.93361437    |

**Table S11.** SCF energies (Hartree) computed at B3LYP/6-31G\*\* level of theory, using MMFF as force field, for the coordinate files of compound **23**.

| Name                         | Energy (Hartree) |
|------------------------------|------------------|
| 01-Compound23-RS_miniMMFF_1  | -805.93186860    |
| 01-Compound23-RS_miniMMFF_10 | -805.93819093    |
| 01-Compound23-RS_miniMMFF_2  | -805.93170282    |
| 01-Compound23-RS_miniMMFF_3  | -805.93354553    |
| 01-Compound23-RS_miniMMFF_4  | -805.93467483    |
| 01-Compound23-RS_miniMMFF_5  | -805.93473107    |
| 01-Compound23-RS_miniMMFF_6  | -805.93722148    |
| 01-Compound23-RS_miniMMFF_7  | -805.93433104    |
| 01-Compound23-RS_miniMMFF_8  | -805.93737579    |
| 01-Compound23-RS_miniMMFF_9  | -805.93834344    |
| 02-Compound23-RR_miniMMFF_11 | -805.93295769    |
| 02-Compound23-RR_miniMMFF_12 | -805.93241529    |
| 02-Compound23-RR_miniMMFF_13 | -805.93439175    |
| 02-Compound23-RR_miniMMFF_14 | -805.93631215    |
| 02-Compound23-RR_miniMMFF_15 | -805.93471171    |
| 02-Compound23-RR_miniMMFF_16 | -805.93574788    |
| 02-Compound23-RR_miniMMFF_17 | -805.93458595    |
| 02-Compound23-RR_miniMMFF_18 | -805.93755607    |
| 02-Compound23-RR_miniMMFF_19 | -805.93813336    |
| 02-Compound23-RR_miniMMFF_20 | -805.93369430    |

### 3.8. Cartesian coordinates of conformers for compound 23.

**Table S12.** Cartesian coordinates of the conformations found for isomers of compound **23** for AMBER, MM3 and MMFF as required for mix-J-DP4 analysis.

|                              |          |          |          |                              |          |          |          |                              |          |          |          |                               |          |          |          |
|------------------------------|----------|----------|----------|------------------------------|----------|----------|----------|------------------------------|----------|----------|----------|-------------------------------|----------|----------|----------|
| 01-Compound23-RS_miniAMBER_1 | C        | 3.35800  | -0.55490 | 0.50750                      | C        | 2.38060  | -1.45190 | -0.21920                     | C        | 0.71310  | 0.47730  | -0.15380                      |          |          |          |
| O                            | -3.51790 | -0.78630 | 1.35970  | C                            | 3.30720  | 0.79380  | -0.20650 | C                            | 0.96270  | -0.92680 | -0.18470 | C                             | -0.62640 | 0.94720  | -0.01800 |
| C                            | -3.52380 | -0.72580 | -0.05150 | C                            | 2.36620  | -1.47890 | -0.18830 | C                            | 0.71920  | 0.46310  | -0.16070 | C                             | -0.91300 | 2.43160  | 0.19290  |
| C                            | -3.35710 | 0.71200  | -0.54150 | C                            | 0.95440  | -0.93520 | -0.16040 | C                            | -0.62100 | 0.93420  | -0.04150 | C                             | -1.70790 | 0.02310  | -0.05540 |
| C                            | -2.37110 | -1.55410 | -0.60930 | C                            | 0.71500  | 0.45690  | -0.15610 | C                            | -0.90370 | 2.42310  | 0.14410  | C                             | -3.16480 | 0.49240  | -0.01050 |
| C                            | -0.99440 | -0.96540 | -0.36160 | C                            | -0.62720 | 0.93130  | -0.05110 | C                            | -1.70300 | 0.00970  | -0.07280 | C                             | -3.77000 | 0.47010  | 1.39510  |
| C                            | -0.80390 | 0.42260  | -0.16730 | C                            | -0.90980 | 2.42360  | 0.11200  | C                            | -3.15850 | 0.48800  | -0.02950 | O                             | -3.99270 | -0.29000 | -0.85360 |
| C                            | 0.52100  | 0.93020  | -0.01380 | C                            | -1.71120 | 0.00780  | -0.07600 | C                            | -3.74190 | 0.54080  | 1.38490  | C                             | -1.43870 | -1.36240 | -0.11970 |
| C                            | 0.77140  | 2.43580  | 0.04480  | C                            | -3.16750 | 0.48740  | -0.05270 | O                            | -4.01670 | -0.31760 | -0.81930 | O                             | -2.44610 | -2.28420 | -0.12850 |
| C                            | 1.62210  | 0.03060  | 0.06230  | C                            | -3.75320 | 0.59100  | 1.35800  | C                            | -1.43140 | -1.37670 | -0.12680 | C                             | -0.11680 | -1.81430 | -0.16940 |
| C                            | 3.04770  | 0.53540  | 0.31430  | O                            | -4.02850 | -0.34140 | -0.81490 | O                            | -2.43500 | -2.30150 | -0.14190 | C                             | 1.88550  | 1.40090  | -0.27350 |
| C                            | 3.83050  | 0.82030  | -0.97030 | C                            | -1.44140 | -1.37960 | -0.10450 | C                            | -0.10880 | -1.82820 | -0.16260 | O                             | 1.75610  | 2.58060  | -0.55930 |
| O                            | 3.81660  | -0.36520 | 1.09370  | O                            | -2.44420 | -2.30540 | -0.10630 | C                            | 1.89230  | 1.38570  | -0.27630 | H                             | -3.25180 | 1.50160  | -0.41060 |
| C                            | 1.40130  | -1.35370 | -0.11730 | C                            | -0.11970 | -1.83280 | -0.12830 | O                            | 1.76900  | 2.55300  | -0.61160 | H                             | 4.65080  | -1.94130 | 0.88330  |
| O                            | 2.42650  | -2.25400 | -0.07900 | C                            | 1.89410  | 1.37590  | -0.27250 | H                            | -3.23170 | 1.47680  | -0.48060 | H                             | 3.02820  | -0.46830 | 1.56700  |
| C                            | 0.10740  | -1.83000 | -0.34430 | O                            | 1.77730  | 2.57410  | -0.47290 | H                            | 4.92290  | -1.20900 | -0.34940 | H                             | 3.89700  | 1.53170  | 0.47810  |
| C                            | -0.21390 | 1.30190  | -0.12080 | H                            | -3.24010 | 1.45760  | -0.54240 | H                            | 2.98290  | -0.48590 | 1.60370  | H                             | 3.74510  | 0.77890  | -1.11600 |
| O                            | -1.97790 | 2.45910  | 0.26850  | H                            | 5.26850  | -0.56360 | 0.91660  | H                            | 3.86170  | 1.52800  | 0.57650  | H                             | 2.68520  | -1.51720 | -1.28210 |
| H                            | 3.01180  | 1.44050  | 0.91930  | H                            | 3.07430  | -0.43470 | 1.55480  | H                            | 3.79610  | 0.79560  | -1.03340 | H                             | 2.40360  | -2.43930 | 0.20380  |
| H                            | -3.67020 | -1.69340 | 1.63740  | H                            | 3.95940  | 1.50030  | 0.30810  | H                            | 2.70890  | -1.51640 | -1.25750 | H                             | -0.15570 | 2.87740  | 0.83640  |
| H                            | -4.47260 | -1.12270 | -0.41580 | H                            | 3.66870  | 0.66860  | -1.22780 | H                            | 2.41210  | -2.45080 | 0.21890  | H                             | -0.92740 | 2.94700  | -0.76790 |
| H                            | -3.41690 | 0.72890  | -1.62990 | H                            | 2.66720  | -1.62150 | -1.22730 | H                            | -0.15140 | 2.87400  | 0.79010  | H                             | -1.85290 | 2.60530  | 1.71090  |
| H                            | -4.16450 | 1.32510  | -0.13890 | H                            | 2.39510  | -2.44720 | 0.31390  | H                            | -0.90040 | 2.92260  | -0.82530 | H                             | -4.79590 | 0.83820  | 1.35930  |
| H                            | -2.42570 | -2.55560 | -0.17990 | H                            | -1.88770 | 2.63290  | 0.53570  | H                            | -1.85050 | 2.61250  | 0.64290  | H                             | -3.76990 | -0.54760 | 1.78650  |
| H                            | -2.50250 | -1.64300 | -1.68870 | H                            | -0.20410 | 2.86200  | 0.81660  | H                            | -4.75940 | 0.93140  | 1.35270  | H                             | -3.18840 | 1.10650  | 2.06240  |
| H                            | 0.15100  | 2.94670  | -0.69060 | H                            | -0.82460 | 2.92330  | -0.85350 | H                            | -3.75720 | -0.46080 | 1.81650  | H                             | -3.87480 | 0.00740  | -1.76170 |
| H                            | 0.54060  | 2.80920  | 1.04310  | H                            | -4.76980 | 0.98270  | 1.31030  | H                            | -3.13490 | 1.18760  | 2.01850  | H                             | -3.31110 | -1.86060 | -0.22190 |
| H                            | 1.78980  | 2.71230  | -0.21250 | H                            | -3.77170 | -0.39510 | 1.82350  | H                            | -4.79040 | 0.20200  | -1.05990 | H                             | 0.07180  | -2.87830 | -0.20600 |
| H                            | 4.81380  | 1.22210  | -0.72430 | H                            | -3.14590 | 1.25760  | 1.97050  | H                            | -3.29020 | -1.87850 | -0.29980 | 33                            |          |          |          |
| H                            | 3.95340  | -0.10170 | -1.53980 | H                            | -4.80140 | 0.17160  | -1.07130 | H                            | 0.08120  | -2.89230 | -0.18910 | 02-Compound23-RR_miniAMBER_11 |          |          |          |
| H                            | 3.29590  | 1.54460  | -1.58490 | H                            | -3.29990 | -1.88710 | -0.27200 | 33                           |          |          |          | O                             | 3.04280  | -0.89910 | 1.67100  |
| H                            | 4.50260  | 0.13240  | 1.54990  | H                            | 0.06920  | -2.89720 | -0.13960 | 01-Compound23-RS_miniAMBER_8 |          |          |          | C                             | 3.41200  | -0.77560 | 0.31190  |
| H                            | 3.23200  | -1.84260 | 0.26280  | 33                           |          |          |          | O                            | -3.69780 | -0.77060 | 1.28110  | C                             | 3.42750  | 0.69880  | -0.10790 |
| H                            | -0.03970 | -2.89040 | -0.49230 | 01-Compound23-RS_miniAMBER_5 |          |          |          | C                            | -3.52880 | -0.74780 | -0.12350 | C                             | 2.41460  | -1.53600 | -0.55790 |
| 33                           |          |          |          | O                            | 4.65990  | -1.05940 | 0.45540  | C                            | -3.31570 | 0.67120  | -0.65090 | C                             | 1.01800  | -0.97310 | -0.41630 |
| 01-Compound23-RS_miniAMBER_2 |          |          |          | C                            | 3.35300  | -0.52690 | 0.52070  | C                            | -2.33730 | -1.61480 | -0.52830 | C                             | 0.83820  | 0.41790  | -0.28710 |
| O                            | -3.53910 | -0.78360 | 1.34310  | C                            | 3.30570  | 0.84370  | -0.15230 | C                            | -0.96720 | -0.99790 | -0.30740 | C                             | -0.46790 | 0.93970  | -0.07120 |
| C                            | -3.51850 | -0.75710 | -0.06980 | C                            | 2.38490  | -1.44340 | -0.21770 | C                            | -0.79440 | 0.39740  | -0.16150 | C                             | -0.66860 | 2.42630  | 0.21110  |
| C                            | -3.33830 | 0.66320  | -0.60360 | C                            | 0.96730  | -0.91610 | -0.18230 | C                            | 0.52080  | 0.93320  | -0.04490 | C                             | -1.59080 | 0.06670  | -0.09900 |
| C                            | -2.35040 | -1.60150 | -0.57150 | C                            | 0.71700  | 0.47350  | -0.15990 | C                            | 0.74730  | 2.44250  | -0.04340 | C                             | -3.01620 | 0.60480  | 0.06120  |
| C                            | -0.97800 | -0.99590 | -0.33510 | C                            | -0.62740 | 0.93660  | -0.04160 | C                            | 1.63610  | 0.05610  | 0.04850  | C                             | -3.52120 | 0.57230  | 1.50600  |
| C                            | -0.79970 | 0.39690  | -0.16750 | C                            | -0.92050 | 2.42370  | 0.14450  | C                            | 3.05570  | 0.58700  | 0.26480  | O                             | -3.95170 | -0.09880 | -0.73870 |
| C                            | 0.51870  | 0.92140  | -0.02580 | C                            | -1.70440 | 0.00560  | -0.07400 | C                            | 3.85320  | 0.74290  | -1.03210 | C                             | -1.38750 | -1.32370 | -0.25910 |
| C                            | 0.75090  | 2.43060  | 0.00600  | C                            | -3.16340 | 0.47460  | -0.03600 | O                            | 3.79810  | -0.24950 | 1.13510  | O                             | -2.43460 | -2.19900 | -0.28040 |
| C                            | 1.62930  | 0.03540  | 0.06360  | C                            | -3.74670 | 0.54080  | 1.37790  | C                            | 1.43810  | -1.33690 | -0.07720 | C                             | -0.09050 | -1.82940 | -0.39770 |
| C                            | 3.04970  | 0.56160  | 0.29950  | O                            | -4.01840 | -0.34440 | -0.81540 | O                            | 2.48490  | -2.21180 | -0.02080 | C                             | 2.04430  | 1.28840  | -0.40050 |
| C                            | 3.82740  | 0.82070  | -0.99340 | C                            | -1.42470 | -1.37910 | -0.12420 | C                            | 0.14920  | -1.84360 | -0.27000 | O                             | 1.96940  | 2.43950  | -0.80370 |
| O                            | 3.82830  | -0.31150 | 1.10040  | O                            | -2.42150 | -2.31120 | -0.13630 | C                            | -2.01250 | 1.25500  | -0.11900 | H                             | -3.06230 | 1.62990  | -0.30470 |
| C                            | 1.42250  | -1.35450 | -0.08750 | C                            | -0.09980 | -1.82260 | -0.15910 | O                            | -2.01690 | 2.36170  | 0.39620  | H                             | 3.09410  | -1.82410 | 1.92670  |
| O                            | 2.45800  | -2.24190 | -0.03300 | C                            | 1.88660  | 1.40340  | -0.27420 | H                            | 3.02790  | 1.55040  | 0.77230  | H                             | 4.41250  | -1.19200 | 1.84440  |
| C                            | 0.13260  | -1.84870 | -0.30170 | O                            | 1.75460  | 2.59070  | -0.52470 | H                            | -2.95460 | -0.33790 | 1.70970  | H                             | 3.91410  | 1.29150  | 0.66740  |
| C                            | -2.01690 | 1.26270  | -0.13530 | H                            | -3.24360 | 1.45630  | -0.50120 | H                            | -4.43250 | -1.16390 | -0.57140 | H                             | 4.01460  | 0.78580  | -1.02270 |
| O                            | -2.00830 | 2.40670  | 0.29280  | H                            | 4.67320  | -1.91400 | 0.89410  | H                            | -3.27030 | 0.64810  | -1.74010 | H                             | 2.71880  | -1.46360 | -1.60310 |
| H                            | 3.00510  | 1.48260  | 0.87930  | H                            | 3.05140  | -0.43150 | 1.56550  | H                            | -4.15350 | 1.30120  | -0.34870 | H                             | 2.42580  | -2.58740 | -0.26770 |
| H                            | -4.27460 | -0.25260 | 1.66130  | H                            | 3.91890  | 1.54390  | 0.41580  | H                            | -2.40420 | -2.56330 | 0.00740  | H                             | -0.76270 | 2.96930  | -0.72980 |
| H                            | -4.45470 | -1.17470 | -0.44350 | H                            | 3.72050  | 0.75810  | -1.15730 | H                            | -2.42510 | -1.82660 | -1.59500 | H                             | -1.54470 | 2.61330  | 0.82730  |
| H                            | -3.34480 | 0.64190  | -1.69370 | H                            | 2.69730  | -1.54260 | -1.25850 | H                            | 0.03840  | 2.93820  | -0.70530 | H                             | 0.17090  | 2.82670  | 0.77790  |
| H                            | -4.16440 | 1.28850  | -0.26270 | H                            | 2.41910  | -2.42870 | 0.24940  | H                            | 0.63570  | 2.83260  | 0.96880  | H                             | -4.51900 | 1.00850  | 1.56070  |
| H                            | -2.40580 | -2.57960 | -0.09090 | H                            | -0.19470 | 2.86720  | 0.82520  | H                            | 1.72740  | 2.71170  | -0.43030 | H                             | -3.56150 | -0.45800 | 1.86130  |
| H                            | -2.46670 | -1.74660 | -1.64630 | H                            | -0.87790 | 2.93200  | -0.81940 | H                            | 4.84160  | 1.14610  | -0.80930 | H                             | -2.85070 | 1.14100  | 2.15070  |
| O                            | 0.10130  | 2.92660  | -0.71430 | H                            | -1.88520 | 2.61360  | 0.60640  | H                            | 3.96530  | -0.22510 | -1.52150 | H                             | -4.70340 | 0.47710  | -0.90940 |
| H                            | 0.54770  | 2.81330  | 1.00670  | H                            | -3.75650 | -0.45590 | 1.82070  | H                            | 3.33670  | 1.42430  | -1.70840 | H                             | -3.27390 | -1.72550 | -0.36170 |
| H                            | 1.75830  | 2.71200  | -0.28750 | H                            | -3.14310 | 1.19800  | 2.00420  | H                            | 5.33480  | -0.06120 | 2.04180  | H                             | 0.04860  | -2.89570 | -0.50430 |
| H                            | 3.28490  | 1.52420  | -1.62520 | H                            | -4.76640 | 0.92540  | 1.34130  | H                            | 3.30240  | -1.76750 | 0.24500  | 33                            |          |          |          |
| H                            | 4.80740  | 1.23800  | -0.75970 | H                            | -4.79100 | 0.17100  | -1.06810 | H                            | 0.01670  | -2.91110 | -0.37990 | 02-Compound23-RR_miniAMBER_12 |          |          |          |
| H                            | 3.95830  | -0.11420 | -1.53950 | H                            | -3.28000 | -1.89560 | -0.29500 | 33                           |          |          |          | O                             | 3.05930  | -0.87550 | 1.66740  |
| H                            | 4.50850  | 0.20420  | 1.54500  | H                            | 0.09520  | -2.88550 | -0.18610 | 01-Compound23-RS_miniAMBER_9 |          |          |          | C                             | 3.41210  | -0.80300 | 0.29970  |
| H                            | 3.25790  | -1.81550 | 0.30340  | 33                           |          |          |          | O                            | 4.63080  | -1.14120 | 0.44210  | C                             | 3.43360  | 0.64800  | -0.19120 |
| H                            | -0.00640 | -2.91330 | -0.42590 | 01-Compound23-RS_miniAMBER_6 |          |          |          | C                            | 3.33810  | -0.57430 | 0.51340  | C                             | 2.39250  | -1.58380 | -0.52410 |
| 33                           |          |          |          | O                            | -3.52440 | -0.79530 | 1.34150  | C                            | 3.30530  | 0.79520  | -0.16320 | C                             | 1.00300  | -1.00140 | -0.39180 |
| 01-Compound23-RS_miniAMBER_3 |          |          |          | C                            | -3.50570 | -0.77130 | -0.07150 | C                            | 2.35260  | -1.47690 | -0.21930 | C                             | 0.83450  | 0.39430  | -0.29310 |
| O                            | -3.70530 | -0.76150 | 1.28490  | C                            | -3.33510 | 0.64950  | -0.60760 | C                            | 0.94230  | -0.93200 | -0.17600 | C                             | -0.46880 | 0.92900  | -0.08550 |
| C                            | -3.54020 | -0.73450 | -0.12000 | C                            | -2.33260 | -1.60980 | -0.57170 | C                            | 0.71150  | 0.46100  | -0.15280 | C                             | -0.65930 | 2.42160  | 0.17200  |
| C                            | -3.32030 | 0.68460  | -0.64370 | C                            | -0.96360 | -0.99440 | -0.34020 | C                            | -0.62520 | 0.94270  | -0.02530 | C                             | -1.59850 | 0.06380  | -0.09760 |
| C                            | -2.35470 | -1.60580 | -0.53200 | C                            | -0.79500 | 0.40020  | -0.1768  |                              |          |          |          |                               |          |          |          |

|                               |          |          |          |                               |          |          |          |                               |          |          |          |                            |                            |
|-------------------------------|----------|----------|----------|-------------------------------|----------|----------|----------|-------------------------------|----------|----------|----------|----------------------------|----------------------------|
| C                             | -0.65700 | 2.42390  | 0.18330  | O                             | 1.98030  | 2.41440  | -0.79630 | H                             | -0.90670 | 2.87490  | -0.91040 | 01-Compound23-RS_miniMM3_3 |                            |
| C                             | -1.59010 | 0.06570  | -0.10130 | H                             | -3.06410 | 1.66870  | -0.25880 | H                             | -1.88460 | 2.64900  | 0.55860  | O                          | -3.58560 -0.76570 1.33910  |
| C                             | -3.01380 | 0.61260  | 0.04410  | H                             | 3.74330  | -0.52320 | 2.19180  | H                             | -4.90570 | 0.93030  | 1.06360  | C                          | -3.49300 -0.77000 -0.08430 |
| C                             | -3.52540 | 0.60660  | 1.48700  | H                             | 4.38630  | -1.26460 | 0.15360  | H                             | -3.92800 | -0.43240 | 1.64930  | C                          | -3.32220 0.65150 -0.61020  |
| O                             | -3.94790 | -0.10140 | -0.74760 | H                             | 3.96840  | 1.24820  | 0.55250  | H                             | -3.35630 | 1.23270  | 1.87530  | C                          | -2.31830 -1.63200 -0.54100 |
| C                             | -1.39260 | -1.32780 | -0.23820 | H                             | 3.97000  | 0.68500  | -1.12170 | H                             | -3.73560 | -0.09310 | -1.92250 | C                          | -0.96890 -0.99130 -0.32260 |
| O                             | -2.44290 | -2.19910 | -0.24730 | H                             | 2.66630  | -1.54590 | -1.59660 | H                             | -3.32470 | -1.85990 | -0.22370 | C                          | -0.80160 0.39510 -0.15470  |
| C                             | -0.09750 | -1.84120 | -0.36560 | H                             | 2.37570  | -2.62330 | -0.22200 | H                             | 0.04160  | -2.88820 | 0.12580  | C                          | 0.50510 0.91930 0.02190    |
| C                             | 2.05290  | 1.26800  | -0.40930 | H                             | -0.75460 | 2.97150  | -0.72180 | 33                            |          |          |          | C                          | 0.69910 2.41910 0.11730    |
| O                             | 1.98040  | 2.42240  | -0.80030 | H                             | -1.51810 | 2.62160  | 0.84740  | 02-Compound23-RR_miniAMBER_20 |          |          |          | C                          | 1.62710 0.05150 0.08340    |
| H                             | -3.05490 | 1.63110  | -0.34050 | H                             | 0.19650  | 2.82470  | 0.77540  | O                             | 4.73660  | -1.04120 | 0.02480  | C                          | 3.02930 0.59450 0.30260    |
| H                             | 2.23470  | -0.62180 | 1.85870  | H                             | -4.55750 | 0.98770  | 1.54650  | C                             | 3.46720  | -0.51770 | -0.31280 | C                          | 3.73940 0.87760 -1.02390   |
| H                             | 4.41750  | 2.21650  | 0.14040  | H                             | -3.59740 | -0.47850 | 1.83740  | C                             | 3.23790  | 0.84190  | 0.34200  | O                          | 3.80430 -0.37210 1.00550   |
| H                             | 3.93590  | 1.27130  | 0.64010  | H                             | -2.90250 | 1.11940  | 2.17500  | C                             | 2.37330  | -1.47470 | 0.15730  | C                          | 1.42170 -1.32910 -0.07580  |
| H                             | 4.01260  | 0.75140  | -1.04580 | H                             | -3.81840 | 0.26990  | -1.67020 | C                             | 0.96020  | -0.92500 | 0.06370  | O                          | 2.42520 -2.24800 -0.04680  |
| H                             | 2.70150  | -1.52240 | -1.58300 | H                             | -3.32060 | -1.69100 | -0.24160 | C                             | 0.70750  | 0.46410  | -0.00380 | C                          | 0.14340 -1.83100 -0.28360  |
| H                             | 2.41410  | -2.60980 | -0.21680 | H                             | -0.00260 | -2.90610 | -0.45260 | C                             | -0.63800 | 0.93330  | -0.01060 | C                          | -2.01270 1.26900 -0.15270  |
| H                             | -0.73040 | 2.95910  | -0.76390 | 33                            |          |          |          | C                             | -0.93480 | 2.42890  | 0.06650  | O                          | -1.98260 2.41790 0.22670   |
| H                             | -1.54220 | 2.62520  | 0.78180  | 02-Compound23-RR_miniAMBER_17 |          |          |          | C                             | -1.71280 | 0.00280  | -0.06700 | H                          | 2.98360 1.51980 0.91750    |
| H                             | 0.17530  | 2.82300  | 0.76180  | O                             | 4.73650  | -0.99920 | 0.12230  | C                             | -3.16830 | 0.47420  | -0.15560 | H                          | -2.76990 -0.46630 1.72400  |
| H                             | -4.52180 | 1.04760  | 1.52930  | C                             | 3.47710  | -0.49260 | -0.27060 | C                             | -3.85280 | 0.60070  | 1.20790  | H                          | -4.43730 -1.19940 -0.49140 |
| H                             | -3.57190 | -0.41750 | 1.85920  | C                             | 3.22230  | 0.86320  | 0.38260  | O                             | -3.96450 | -0.37950 | -0.95950 | H                          | -3.35160 0.64930 -1.72400  |
| H                             | -2.85610 | 1.18350  | 2.12540  | C                             | 2.37890  | -1.45920 | 0.17220  | C                             | -1.43470 | -1.38230 | -0.02140 | H                          | -4.17920 1.27870 -0.27290  |
| H                             | -4.70030 | 0.47140  | -0.92670 | C                             | 0.96320  | -0.91620 | 0.07360  | O                             | -2.43300 | -2.31250 | -0.05370 | H                          | -2.36560 -2.61870 -0.02530 |
| H                             | -3.28100 | -1.72610 | -0.34300 | C                             | 0.70400  | 0.47110  | 0.00100  | C                             | -0.11160 | -1.82690 | 0.06220  | H                          | -2.42500 -1.84260 -1.63050 |
| H                             | 0.03760  | -2.91010 | -0.45570 | C                             | -0.64270 | 0.93530  | -0.01190 | C                             | 1.87740  | 1.38590  | -0.07780 | H                          | 0.10340 2.96050 -0.64910   |
| 33                            |          |          |          | C                             | -0.94520 | 2.43000  | 0.05720  | O                             | 1.79580  | 2.52110  | -0.51970 | H                          | 0.41460 2.80160 1.12270    |
| 02-Compound23-RR_miniAMBER_14 |          |          |          | C                             | -1.71350 | 0.00020  | -0.06770 | H                             | -3.21000 | 1.43680  | -0.66380 | H                          | 1.74220 2.74410 -0.06740   |
| O                             | 3.03660  | -0.93040 | 1.65770  | C                             | -3.17040 | 0.46590  | -0.16060 | H                             | 4.78320  | -1.18150 | 0.97370  | H                          | 4.76220 1.28560 -0.86130   |
| C                             | 3.40230  | -0.79010 | 0.29950  | C                             | -3.85940 | 0.58980  | 1.20080  | H                             | 3.41020  | -0.40260 | -1.39700 | H                          | 3.84490 -0.04150 -1.64260  |
| C                             | 3.42360  | 0.69060  | -0.09880 | O                             | -3.96030 | -0.39170 | -0.96690 | C                             | 3.26560  | 0.74400  | 1.42750  | H                          | 3.18550 1.62220 -1.63780   |
| C                             | 2.39800  | -1.53490 | -0.57650 | C                             | -1.42980 | -1.38350 | -0.01730 | H                             | 4.02020  | 1.53380  | 0.02710  | H                          | 4.42240 0.09010 1.55660    |
| C                             | 1.00480  | -0.96780 | -0.42080 | O                             | -2.42420 | -2.31760 | -0.05080 | H                             | 2.44580  | -2.38800 | -0.43550 | H                          | 3.27300 -1.86650 0.24050   |
| C                             | 0.83370  | 0.42290  | -0.27640 | C                             | -0.10500 | -1.82250 | 0.07190  | H                             | 2.55480  | -1.73160 | 1.20190  | H                          | 0.01550 -2.91900 -0.41270  |
| C                             | -0.46760 | 0.94990  | -0.04630 | C                             | 1.86950  | 1.39610  | -0.07170 | H                             | -0.87560 | 2.86780  | -0.93010 | 33                         |                            |
| C                             | -0.66220 | 2.43280  | 0.25670  | O                             | 1.79080  | 2.51860  | -0.54600 | H                             | -1.91070 | 2.64030  | 0.49570  | 01-Compound23-RS_miniMM3_4 |                            |
| C                             | -1.59450 | 0.08350  | -0.07880 | H                             | -3.21440 | 1.42860  | -0.66850 | H                             | -0.22350 | 2.92490  | 0.72580  | O                          | 4.57580 -1.15010 0.47430   |
| C                             | -3.01820 | 0.62060  | 0.08550  | H                             | 4.89420  | -1.83120 | -0.33170 | H                             | -4.86590 | 0.98320  | 1.08060  | C                          | 3.25970 -0.60280 0.54000   |
| C                             | -3.55030 | 0.51050  | 1.51620  | H                             | 3.45480  | -0.37530 | -1.35570 | H                             | -3.89780 | -0.37590 | 1.69140  | C                          | 3.27530 0.81240 -0.03180   |
| O                             | -3.92770 | -0.04710 | -0.77220 | H                             | 3.22400  | 0.75900  | 1.46810  | H                             | -3.29440 | 1.28450  | 1.84740  | C                          | 2.33270 -1.46900 -0.30700  |
| C                             | -1.40150 | -1.30620 | -0.25090 | H                             | 4.00810  | 1.56160  | 0.09190  | H                             | -4.71240 | 0.12430  | -1.29580 | C                          | 0.93040 -0.91890 -0.24640  |
| O                             | -2.45720 | -2.17230 | -0.26760 | H                             | 2.45960  | -2.36690 | -0.42770 | H                             | -3.27480 | -1.90500 | -0.29900 | C                          | 0.70620 0.46650 -0.19030   |
| C                             | -0.10850 | -1.81840 | -0.40330 | H                             | 2.55250  | -1.72440 | 1.21640  | H                             | 0.08170  | -2.88940 | 0.11110  | C                          | -0.62240 0.94820 -0.07720  |
| C                             | 2.04330  | 1.28700  | -0.39140 | H                             | -0.89910 | 2.86140  | -0.94320 | 33                            |          |          |          | C                          | -0.86920 2.43550 0.07060   |
| O                             | 1.97220  | 2.43680  | -0.79890 | H                             | -1.91780 | 2.63840  | 0.49550  | 01-Compound23-RS_miniMM3_1    |          |          |          | C                          | -1.71460 0.04290 -0.07160  |
| H                             | -3.06740 | 1.66590  | -0.22020 | H                             | -0.22920 | 2.93510  | 0.70450  | O                             | -3.16080 | -0.91830 | 1.49130  | C                          | -3.14940 0.53600 0.00280   |
| H                             | 3.09030  | -1.85820 | 1.90270  | H                             | -4.87380 | 0.96820  | 1.07050  | C                             | -3.43110 | -0.79220 | 0.09780  | C                          | -3.68350 0.53390 1.43670   |
| H                             | 4.40050  | -1.20900 | 0.16330  | H                             | -3.90170 | -0.38670 | 1.68460  | C                             | -3.40780 | 0.69010  | -0.26150 | O                          | -3.97320 -0.32960 -0.76580 |
| H                             | 3.90670  | 1.27100  | 0.68770  | H                             | -3.30560 | 1.27630  | 1.84130  | C                             | -2.36140 | -1.51530 | -0.71540 | C                          | -1.45330 -1.33690 -0.12820 |
| H                             | 4.01640  | 0.78950  | -1.00870 | H                             | -4.71310 | 0.10700  | -1.29970 | C                             | -0.99340 | -0.94040 | -0.45410 | O                          | -2.42910 -2.28640 -0.10670 |
| H                             | 2.69830  | -1.44980 | -1.62190 | H                             | -3.26720 | -1.91310 | -0.29780 | C                             | -0.81890 | 0.42790  | -0.18920 | C                          | -0.14650 -1.80220 -0.20300 |
| H                             | 2.40590  | -2.59020 | -0.30040 | H                             | 0.09230  | -2.88400 | 0.12660  | C                             | 0.48740  | 0.91730  | 0.07910  | C                          | 1.88180 1.38410 -0.27260   |
| H                             | -0.79370 | 2.98530  | -0.67400 | 33                            |          |          |          | C                             | 0.67310  | 2.39900  | 0.33810  | O                          | 1.75990 2.55310 -0.56400   |
| H                             | -1.51700 | 2.60370  | 0.90750  | 02-Compound23-rr_miniAMBER_18 |          |          |          | C                             | 1.60010  | 0.03230  | 0.09810  | H                          | -3.23640 1.56000 -0.42110  |
| H                             | 0.19390  | 2.83360  | 0.79780  | O                             | 3.11720  | -0.97260 | 1.66870  | C                             | 3.00140  | 0.54110  | 0.39590  | H                          | 5.05180 -0.90870 1.26030   |
| H                             | -4.55510 | 0.93110  | 1.56800  | C                             | 3.41340  | -0.81180 | 0.29390  | C                             | 3.69850  | 1.03480  | -0.87440 | H                          | 2.90030 -0.59030 1.59500   |
| H                             | -3.58490 | -0.35510 | 1.82400  | C                             | 3.43130  | 0.66750  | -0.11060 | O                             | 3.79740  | -0.51010 | 0.93540  | H                          | 3.83670 1.48450 0.65760    |
| H                             | -2.90050 | 1.05930  | 2.19820  | C                             | 2.39040  | -1.56370 | -0.55340 | C                             | 1.38410  | -1.32830 | -0.18300 | H                          | 3.82770 0.81810 -1.00000   |
| H                             | -3.82610 | 0.30690  | -1.66160 | C                             | 1.00190  | -0.98520 | -0.40360 | O                             | 2.37280  | -2.26320 | -0.21690 | H                          | 2.67680 -1.49370 -1.36590  |
| H                             | -3.30010 | -1.69720 | -0.28300 | C                             | 0.83760  | 0.40830  | -0.27870 | C                             | 0.10460  | -1.79750 | -0.45060 | H                          | 2.35710 -2.51710 0.06920   |
| H                             | 0.02420  | -2.88470 | -0.51900 | C                             | -0.46270 | 0.94400  | -0.05860 | C                             | -2.01940 | 1.32020  | -0.21550 | H                          | -1.85030 2.67240 0.52950   |
| 33                            |          |          |          | C                             | -0.65100 | 2.43090  | 0.22690  | O                             | -1.92220 | 2.52720  | -0.23060 | H                          | -0.12820 2.91310 0.74700   |
| 02-Compound23-RR_miniAMBER_15 |          |          |          | C                             | -1.59370 | 0.08250  | -0.08250 | H                             | 2.95350  | 1.35740  | 1.14830  | H                          | -0.83290 2.95270 -0.91390  |
| O                             | 4.72020  | -1.06640 | 0.10330  | C                             | -3.01580 | 0.62830  | 0.06780  | H                             | -3.25200 | -1.82710 | 1.74980  | H                          | -4.73650 0.89240 1.47950   |
| C                             | 3.46690  | -0.53350 | -0.27560 | C                             | -3.55190 | 0.54800  | 1.49910  | H                             | -4.43670 | -1.21620 | -0.12770 | H                          | -3.66210 -0.48160 1.89110  |
| C                             | 3.22660  | 0.82220  | 0.38370  | O                             | -3.92600 | -0.05290 | -0.77810 | H                             | -3.81580 | 0.82260  | -1.29050 | H                          | -3.08480 1.19950 2.09770   |
| C                             | 2.36170  | -1.48810 | 0.17490  | C                             | -1.40600 | -1.31050 | -0.23080 | H                             | -4.09300 | 1.24710  | 0.41850  | H                          | -3.77140 -0.16970 -1.68010 |
| C                             | 0.95060  | -0.93440 | 0.07520  | O                             | -2.46470 | -2.17290 | -0.23490 | H                             | -2.38240 | -2.60210 | -0.47220 | H                          | -3.32850 -1.91490 -0.14140 |
| C                             | 0.70360  | 0.45510  | 0.00380  | C                             | -0.11490 | -1.83030 | -0.37260 | H                             | -2.58930 | -1.42960 | -1.80250 | H                          | 0.03130 -2.89010 -0.23880  |
| C                             | -0.63890 | 0.93110  | -0.01070 | C                             | 2.05150  | 1.26700  | -0.40040 | H                             | 0.37420  | 3.00260  | -0.54680 | 33                         |                            |
| C                             | -0.92770 | 2.42840  | 0.05890  | O                             | 1.98320  | 2.41940  | -0.79820 | H                             | 0.07770  | 2.73480  | 1.21590  | 01-Compound23-RS_miniMM3_5 |                            |
| H                             | -1.71770 | 0.00540  | -0.06820 | H                             | -3.06050 | 1.66630  | -0.25940 | H                             | 1.71660  | 2.70030  | 0.54980  | O                          | 4.58730 -1.10350 0.48890   |
| C                             | -3.17030 | 0.48390  | -0.16220 | H                             | 2.23170  | -0.65150 | 1.85460  | H                             | 4.72210  | 1.41530  | -0.65800 | C                          | 3.25920 -0.58540 0.54530   |
| C                             | -3.85930 | 0.61360  | 1.19880  | H                             | 4.40500  | -1.23230 | 0.11960  | H                             | 3.79950  | 0.22520  | -1.63170 | C                          | 3.27270 0.83640 -0.01040   |
| O                             | -3.96750 | -0.36590 | -0.96940 | H                             | 3.92430  | 1.25140  | 0.66740  | H                             | 3.13730  | 1.86580  | -1.35650 | C                          | 2.34330 -1.44770 -0.31830  |
| C                             | -1.44610 | -1.38100 | -0.01860 | H                             | 4.01710  | 0.75920  | -1.02590 | H                             | 4.38620  | -0.13350 | 1.57640  | C                          | 0.93730 -0.90810 -0.25470  |
| O                             | -2.44890 | -2.30610 | -0.05390 | H                             | 2.68230  | -1.50540 | -1.60310 | H                             | 3.23470  | -1.91090 | 0.06390  | C                          | 0.70680 0.47570 -0.19000   |
| C                             | -0.12520 | -1.83140 | 0.07140  | H                             | 2.39540  | -2.61260 | -0.25270 | H                             | -0.03390 | -2.87100 | -0.66080 | C                          | -0.62360 0.95080 -0.07280  |
| C                             | 1.87800  | 1.36920  | -0.06620 | H                             | -0.76060 | 2.97560  | -0.71140 | 33                            |          |          |          | C                          | -0.87610 2.43610 0.08510   |
| O                             |          |          |          |                               |          |          |          |                               |          |          |          |                            |                            |

|    |                            |          |          |    |                             |          |          |    |                             |          |          |    |                             |          |          |
|----|----------------------------|----------|----------|----|-----------------------------|----------|----------|----|-----------------------------|----------|----------|----|-----------------------------|----------|----------|
| C  | 1.63690                    | 0.07300  | 0.02720  | H  | -3.23650                    | 1.55960  | -0.42250 | H  | 0.17010                     | 2.85100  | 0.74410  | O  | 3.00660                     | -0.85410 | 1.65230  |
| C  | 3.03460                    | 0.62030  | 0.30500  | H  | 5.05320                     | -0.90560 | 1.25830  | H  | -3.51620                    | -0.39560 | 1.91430  | C  | 3.37840                     | -0.83590 | 0.27540  |
| C  | 3.79200                    | 0.83640  | -1.00680 | H  | 2.90100                     | -0.58990 | 1.59500  | H  | -2.83910                    | 1.24220  | 2.16210  | C  | 3.41520                     | 0.60610  | -0.22650 |
| O  | 3.77220                    | -0.31390 | 1.08090  | H  | 3.83720                     | 1.48460  | 0.65650  | H  | -4.52520                    | 1.05010  | 1.59240  | C  | 2.38810                     | -1.62070 | -0.52010 |
| C  | 1.44830                    | -1.30970 | -0.08940 | H  | 3.82710                     | 0.81770  | -1.00090 | H  | -3.71730                    | 0.05230  | -1.63730 | C  | 0.97100                     | -0.99770 | -0.39580 |
| O  | 2.46640                    | -2.21410 | -0.06670 | H  | 2.67670                     | -1.49460 | -1.36540 | H  | -3.32970                    | -1.76440 | -0.16910 | C  | 0.82480                     | 0.39450  | -0.29020 |
| C  | 0.17490                    | -1.82620 | -0.29080 | H  | 2.35700                     | -2.51710 | 0.07050  | H  | -0.03260                    | -2.91610 | -0.41770 | C  | -0.47080                    | 0.94290  | -0.11390 |
| C  | -2.01360                   | 1.25130  | -0.16950 | H  | -0.12860                    | 2.91340  | 0.74630  | 33 |                             |          |          | C  | -0.62920                    | 2.43500  | 0.09270  |
| O  | -2.00390                   | 2.40410  | 0.20060  | H  | -0.83350                    | 2.95240  | -0.91450 | O  | 02-Compound23-RR_miniMM3_13 |          |          | C  | -1.61030                    | 0.09840  | -0.09720 |
| H  | 2.99430                    | 1.57730  | 0.86910  | H  | -1.85070                    | 2.67220  | 0.52900  | O  | 3.07180                     | -0.94160 | 1.68130  | C  | -3.01180                    | 0.66560  | 0.04600  |
| H  | -4.24410                   | -0.28970 | 1.65400  | H  | -4.73600                    | 0.89400  | 1.47910  | C  | 3.37790                     | -0.83600 | 0.29140  | C  | -3.49780                    | 0.63810  | 1.49660  |
| H  | -4.42500                   | -1.24530 | -0.43130 | H  | -3.66200                    | -0.48000 | 1.89160  | C  | 3.41750                     | 0.63360  | -0.13020 | O  | -3.90740                    | -0.12330 | -0.72510 |
| H  | -3.30920                   | 0.57510  | -1.75700 | H  | -3.08430                    | 1.20120  | 2.09670  | C  | 2.35360                     | -1.59780 | -0.54730 | C  | -1.42730                    | -1.29070 | -0.20670 |
| H  | -4.17450                   | 1.24260  | -0.34690 | H  | -3.77150                    | -0.17160 | -1.67980 | C  | 0.98240                     | -0.98640 | -0.41420 | O  | -2.45320                    | -2.18610 | -0.18060 |
| H  | -2.32900                   | -2.63110 | -0.00010 | H  | -3.32850                    | -1.91490 | -0.13970 | C  | 0.83170                     | 0.40410  | -0.29750 | C  | -0.15100                    | -1.82270 | -0.34110 |
| H  | -2.40580                   | -1.87750 | -1.61530 | H  | 0.03130                     | -2.89020 | -0.23830 | C  | -0.46390                    | 0.94820  | -0.11620 | C  | 2.04330                     | 1.25020  | -0.39610 |
| H  | 1.72580                    | 2.76210  | -0.11600 | 33 |                             |          |          | C  | -0.62570                    | 2.43920  | 0.09730  | O  | 1.97250                     | 2.42940  | -0.66470 |
| H  | 0.07310                    | 2.96490  | -0.65980 | O  | 01-Compound23-RS_miniMM3_10 |          |          | C  | -1.60060                    | 0.10020  | -0.10250 | H  | -3.05520                    | 1.70840  | -0.33680 |
| H  | 4.23220                    | 2.81530  | 1.10520  | O  | 4.58740                     | -1.10330 | 0.48890  | C  | -3.00340                    | 0.66320  | 0.04730  | H  | 3.76270                     | -0.64540 | 2.18690  |
| H  | 4.81610                    | 1.23330  | -0.82510 | C  | 3.25930                     | -0.58510 | 0.54530  | C  | -3.48320                    | 0.62870  | 1.49990  | H  | 4.37970                     | -1.30910 | 0.14970  |
| H  | 3.90180                    | -0.10610 | -1.58800 | C  | 3.27270                     | 0.83630  | -0.01110 | O  | -3.89920                    | -0.12710 | -0.72210 | H  | 4.03560                     | 1.22650  | 0.46030  |
| H  | 3.27090                    | 1.56690  | -1.66490 | C  | 2.34320                     | -1.44780 | -0.31790 | C  | -1.41360                    | -1.28770 | -0.22140 | H  | 3.93080                     | 0.62940  | -1.21480 |
| H  | 3.40620                    | -0.29920 | 1.95740  | C  | 0.93740                     | -0.90820 | -0.25440 | O  | -2.43650                    | -2.18620 | -0.19860 | H  | 2.62690                     | -1.65310 | -1.59560 |
| H  | 3.32730                    | -1.81880 | 0.15790  | C  | 0.70680                     | 0.47570  | -0.18990 | C  | -0.13620                    | -1.81560 | -0.36320 | H  | 2.32040                     | -2.67540 | -0.16230 |
| H  | 0.05650                    | -2.91540 | -0.41730 | C  | -0.62360                    | 0.95070  | -0.07290 | C  | 2.04930                     | 1.26200  | -0.38190 | H  | -0.61290                    | 2.98280  | -0.87570 |
| 33 |                            |          |          | C  | -0.87610                    | 2.43600  | 0.08470  | O  | 1.97890                     | 2.43170  | -0.68770 | H  | -1.57310                    | 2.70610  | 0.60770  |
| O  | 01-Compound23-RS_miniMM3_7 |          |          | C  | -1.71170                    | 0.04060  | -0.07180 | H  | -3.05100                    | 1.70730  | -0.33160 | H  | 0.16820                     | 2.85050  | 0.74560  |
| O  | 4.57210                    | -1.13400 | 0.59080  | C  | -3.14820                    | 0.52750  | 0.00770  | H  | 2.17370                     | -0.67970 | 1.84660  | H  | -4.52720                    | 1.05190  | 1.58900  |
| C  | 3.24830                    | -0.60280 | 0.58080  | C  | -3.68070                    | 0.51230  | 1.44220  | H  | 4.38530                     | -1.28370 | 0.12670  | H  | -3.51850                    | -0.39350 | 1.91310  |
| C  | 3.26650                    | 0.83700  | 0.06870  | O  | -3.96890                    | -0.33610 | -0.76660 | H  | 3.96800                     | 1.22890  | 0.63400  | H  | -2.84160                    | 1.24430  | 2.16000  |
| C  | 2.33980                    | -1.45790 | -0.29950 | C  | -1.44420                    | -1.33770 | -0.13790 | H  | 4.00780                     | 0.71800  | -1.07260 | H  | -3.71600                    | 0.05030  | -1.63910 |
| C  | 0.93400                    | -0.91770 | -0.24260 | O  | -2.41620                    | -2.29140 | -0.12210 | H  | 2.65460                     | -1.58240 | -1.61990 | H  | -3.33050                    | -1.76420 | -0.16880 |
| C  | 0.70770                    | 0.46660  | -0.18420 | C  | -0.13540                    | -1.79680 | -0.21630 | H  | 2.34020                     | -2.66680 | -0.23420 | H  | -0.03380                    | -2.91680 | -0.41270 |
| C  | -6.20210                   | 0.94820  | -0.07430 | C  | 1.87790                     | 1.39900  | -0.26870 | H  | -0.62200                    | 2.99000  | -0.86940 | 33 |                             |          |          |
| C  | -0.86560                   | 2.43520  | 0.07660  | O  | 1.75070                     | 2.56460  | -0.57170 | H  | -1.56510                    | 2.70420  | 0.62360  | O  | 02-Compound23-RR_miniMM3_17 |          |          |
| C  | -1.71170                   | 0.04280  | -0.07260 | H  | -3.23970                    | 1.55440  | -0.40810 | H  | 0.17760                     | 2.85610  | 0.74200  | O  | 4.68710                     | -1.04480 | 0.04900  |
| C  | -3.14580                   | 0.53690  | 0.00270  | H  | 4.68640                     | -1.77410 | 1.15430  | H  | -4.51340                    | 1.03880  | 1.59810  | C  | 3.40140                     | -0.53830 | -0.30680 |
| C  | -3.68350                   | 0.52360  | 1.43520  | H  | 2.89600                     | -0.57300 | 1.59910  | H  | -3.49900                    | -0.40470 | 0.91220  | C  | 3.21820                     | 0.82600  | 0.34660  |
| O  | -3.96790                   | -0.32210 | -0.77530 | H  | 3.81820                     | 1.50530  | 0.69370  | H  | -2.82610                    | 1.23430  | 2.16290  | C  | 2.32650                     | -1.48370 | 0.22250  |
| C  | -1.44970                   | -1.33680 | -0.13290 | H  | 3.83960                     | 0.85640  | -0.97080 | H  | -3.73300                    | 0.06940  | -1.63630 | C  | 0.93540                     | -0.90600 | 0.11800  |
| O  | -2.42620                   | -2.28580 | -0.11730 | H  | 2.69220                     | -1.45550 | -1.37560 | H  | -3.31590                    | -1.76790 | -0.18780 | C  | 0.69530                     | 0.47700  | 0.02070  |
| C  | -0.14230                   | -1.80210 | -0.20460 | H  | 2.37240                     | -2.50090 | 0.04380  | H  | -0.01690                    | -2.90910 | -0.44610 | C  | -0.64200                    | 0.94520  | -0.04870 |
| C  | 1.88160                    | 1.38470  | -0.26460 | H  | -0.13150                    | 2.91420  | 0.75670  | 33 |                             |          |          | C  | -0.91260                    | 2.43600  | -0.05720 |
| O  | 1.76580                    | 2.53270  | -0.63270 | H  | -0.85100                    | 2.95830  | -0.89750 | O  | 02-Compound23-RR_miniMM3_14 |          |          | C  | -1.72330                    | 0.02750  | -0.07930 |
| H  | -3.23010                   | 1.56500  | -0.41230 | H  | -1.85450                    | 2.66520  | 0.55340  | O  | 2.95490                     | -0.86890 | 1.67240  | C  | -3.16160                    | 0.50170  | -0.19800 |
| H  | 4.90670                    | -1.20060 | -0.29520 | H  | -4.73500                    | 0.86650  | 1.48890  | C  | 3.36370                     | -0.82420 | 0.30770  | C  | -3.84090                    | 0.61960  | 1.16810  |
| H  | 2.85620                    | -0.61360 | 1.62400  | H  | -3.65490                    | -0.50650 | 1.88880  | C  | 3.41510                     | 0.64070  | -0.12580 | O  | -3.89600                    | -0.44270 | -0.96480 |
| H  | 3.75400                    | 1.49450  | 0.82480  | H  | -3.08390                    | 1.17520  | 2.10760  | C  | 2.35960                     | -1.57640 | -0.56510 | O  | -1.44820                    | -1.34730 | 0.01100  |
| H  | 3.88990                    | 0.89860  | -0.85330 | H  | -3.77320                    | -0.16380 | -1.67990 | C  | 0.98390                     | -0.97810 | -0.42700 | O  | -2.41380                    | -2.30750 | 0.01080  |
| H  | 2.69410                    | -1.45380 | -1.35540 | H  | -3.31680                    | -1.92280 | -0.15550 | C  | 0.83210                     | 0.41020  | -0.29220 | C  | -0.13810                    | -1.79620 | 0.11550  |
| H  | 2.36680                    | -2.51460 | 0.05180  | H  | 0.04660                     | -2.88370 | -0.25950 | C  | -0.46330                    | 0.95110  | -0.10300 | C  | 1.86360                     | 1.40640  | -0.01620 |
| H  | -0.10350                   | 2.91910  | 0.72430  | 33 |                             |          |          | C  | -0.62290                    | 2.43870  | 0.13170  | O  | 1.76370                     | 2.56460  | -0.35350 |
| H  | -0.86420                   | 2.94860  | -0.91060 | O  | 02-Compound23-RR_miniMM3_11 |          |          | C  | -1.59910                    | 0.10200  | -0.09910 | H  | -3.21180                    | 1.48170  | -0.72020 |
| H  | -1.83200                   | 2.66840  | 0.56820  | O  | 2.95330                     | -0.86990 | 1.67270  | C  | -3.00090                    | 0.66340  | 0.06200  | H  | 4.99160                     | -1.62580 | -0.63820 |
| H  | -4.73620                   | 0.88300  | 1.47830  | C  | 3.36310                     | -0.82440 | 0.30830  | C  | -3.48270                    | 0.59960  | 1.51290  | H  | 3.31760                     | -0.43630 | -1.41360 |
| H  | -3.66460                   | -0.49540 | 1.88140  | C  | 3.41490                     | 0.64080  | -0.12420 | O  | -3.89640                    | -0.10930 | -0.72560 | H  | 3.30390                     | 0.74540  | 1.45420  |
| H  | -3.08590                   | 1.18320  | 2.10320  | C  | 2.35970                     | -1.57600 | -0.56580 | H  | -1.41160                    | -1.28410 | -0.23860 | H  | 4.02770                     | 1.51400  | 0.00980  |
| H  | -3.76750                   | -0.15090 | -1.68770 | C  | 0.98400                     | -0.97800 | -0.42750 | O  | -2.43500                    | -2.18230 | -0.22900 | H  | 2.38240                     | -2.44730 | -0.33420 |
| H  | -3.32480                   | -1.91290 | -0.15570 | C  | 0.83220                     | 0.41030  | -0.29240 | C  | -0.13380                    | -1.80940 | -0.38780 | H  | 2.52750                     | -1.72010 | 1.29300  |
| H  | 0.03570                    | -2.88990 | -0.24120 | C  | -0.46300                    | 0.95120  | -0.10290 | C  | 2.04810                     | 1.26990  | -0.38260 | H  | -0.74330                    | 2.87350  | -1.06620 |
| 33 |                            |          |          | O  | -0.62240                    | 2.43880  | 0.13240  | O  | 1.97790                     | 2.43520  | -0.70710 | H  | -1.94770                    | 2.69660  | 0.24150  |
| O  | 01-Compound23-RS_miniMM3_8 |          |          | C  | -1.59890                    | 0.10230  | -0.09910 | H  | -3.04670                    | 1.71560  | -0.29450 | H  | -0.27340                    | 2.97590  | 0.67400  |
| C  | -3.60060                   | -0.76620 | 1.32250  | C  | -3.00070                    | 0.66350  | 0.06240  | H  | 3.01330                     | -1.76160 | 1.99030  | H  | -4.89510                    | 0.96350  | 1.07030  |
| C  | -3.48540                   | -0.77940 | -0.09920 | C  | -3.48260                    | 0.59870  | 1.51320  | H  | 4.37630                     | -1.27830 | 0.20670  | H  | -3.85960                    | -0.35080 | 1.71250  |
| C  | -3.31060                   | 0.63890  | -0.63330 | O  | -3.89610                    | -0.10850 | -0.72580 | H  | 3.96460                     | 1.23950  | 0.63660  | H  | -3.31820                    | 1.35130  | 1.82360  |
| C  | -2.30090                   | -1.64280 | -0.52870 | C  | -1.41160                    | -1.28380 | -0.23900 | H  | 4.00940                     | 0.71540  | -1.06640 | H  | -3.61190                    | -0.35290 | -1.86660 |
| C  | -0.95480                   | -0.99230 | -0.31640 | O  | -2.43510                    | -2.18200 | -0.22960 | H  | 2.67380                     | -1.53280 | -1.63290 | H  | -3.30800                    | -1.95410 | -0.14280 |
| C  | -0.79580                   | 0.39610  | -0.15810 | C  | -0.13370                    | -1.80930 | -0.38830 | H  | 2.34970                     | -2.65280 | -0.27950 | H  | 0.04730                     | -2.88080 | 0.19360  |
| C  | 0.50730                    | 0.93120  | 0.00720  | C  | 2.04830                     | 1.26980  | -0.38270 | H  | -0.64430                    | 3.00040  | -0.82860 | 33 |                             |          |          |
| C  | 0.69640                    | 2.43270  | 0.08270  | O  | 1.97840                     | 2.43490  | -0.70840 | H  | -1.55020                    | 2.69330  | 0.68430  | O  | 02-Compound23-RR_miniMM3_18 |          |          |
| C  | 1.63360                    | 0.07140  | 0.07130  | H  | -3.04640                    | 1.71590  | -0.29340 | H  | 0.19500                     | 2.85130  | 0.76060  | O  | 3.07400                     | -0.93880 | 1.68090  |
| C  | 3.03470                    | 0.61620  | 0.29070  | H  | 3.01070                     | -1.76300 | 1.98990  | H  | -4.51240                    | 1.00930  | 1.61830  | C  | 3.37860                     | -0.83570 | 0.29060  |
| C  | 3.78350                    | 0.81930  | -1.02820 | H  | 4.37590                     | -1.27860 | 0.20780  | H  | -3.50060                    | -0.44190 | 1.90410  | C  | 3.41780                     | 0.63320  | -0.13360 |
| O  | 3.77460                    | -0.31580 | 1.06730  | H  | 3.96320                     | 1.23920  | 0.63920  | H  | -2.82540                    | 1.19050  | 2.18900  | C  | 2.35330                     | -1.59880 | -0.54580 |
| C  | 1.43930                    | -1.31140 | -0.08080 | H  | 4.01070                     | 0.71610  | -1.06380 | H  | -3.71670</                  |          |          |    |                             |          |          |

C -3.16130 0.51390 -0.19510 H -4.20270 -0.37030 1.76100 H -3.61100 -0.25770 1.94700 C 3.31080 -0.57260 0.50650  
C -3.83900 0.62990 1.17180 H -4.42610 -1.18420 -0.34110 H -3.02490 1.41520 1.92340 C 3.28290 0.78200 -0.17100  
O -3.90120 -0.42300 -0.96570 H -3.59640 0.76990 -1.51970 H -4.67990 1.02750 1.40750 C 3.23290 -1.50680 -0.18210  
C -1.45750 -1.34500 0.00640 H -4.09010 1.28090 0.11330 H -4.91300 -0.05020 -0.75320 C 0.93500 -0.93490 -0.13700  
O -2.42840 -2.30000 0.00360 H -2.37640 -2.60290 -0.18900 H -3.22120 -1.86880 -0.41780 C 0.69810 0.45430 -0.13170  
C -0.14970 -1.80130 0.10840 H -2.47100 -1.67560 -1.70200 H 0.06580 -2.89320 -0.17330 C -0.63430 0.95540 -0.03840  
C 1.86840 1.39040 -0.01420 H 0.50040 2.95190 -0.49490 33 C -0.87950 2.44320 0.08500  
O 1.77780 2.54850 -0.35480 H 0.03820 2.69950 1.22700 01-Compound23-RS\_miniMMFF\_6 C -1.72990 0.04380 -0.07310  
H -3.20640 1.49640 -0.71330 H 1.70290 2.65040 0.73870 O -3.56430 -0.81430 1.33000 C -3.17140 0.52680 -0.03490  
H 5.32140 -0.77840 -0.57140 H 3.02990 1.99100 -1.25360 C -3.46830 -0.78050 -0.09390 C -3.70830 0.58090 1.39040  
H 3.31120 -0.46320 -1.41410 H 4.65100 1.50840 -0.71490 C -3.32250 0.64090 -0.59220 O -4.00430 -0.37040 -0.78370  
H 3.29590 0.71370 1.46180 H 3.69830 0.41150 -1.70280 C -2.29850 -1.64110 -0.55190 C -1.44750 -1.33380 -0.10950  
H 4.03150 1.48870 0.02700 H 4.77380 -0.11130 1.04020 C -0.95320 -0.99680 -0.31770 O -2.40300 -2.28680 -0.12500  
H 2.36910 -2.46290 -0.34820 H 3.19290 -1.84990 0.23540 C -0.78200 0.39160 -0.14900 C -0.14650 -1.81790 -0.13040  
H 2.51520 -1.74740 1.28390 H -0.00130 -2.90680 -0.54350 C 0.52650 0.94130 0.01550 C 1.89130 1.36600 -0.26360  
H -0.25580 2.97070 0.67800 33 C 0.71120 2.44030 0.11040 O 1.76200 2.56290 -0.51190  
H -0.73670 2.87420 -1.05930 01-Compound23-RS\_miniMMFF\_3 C 1.65190 0.06870 0.08890 H -3.28130 1.50230 -0.51790  
H -1.93420 2.70040 0.25540 O -3.40180 -1.00590 1.44700 C 3.05940 0.59520 0.32130 H 5.23060 -0.53940 0.88820  
H -4.89140 0.97980 1.07610 C -3.45810 -0.75400 0.04140 C 3.77920 0.87780 -0.99190 H 3.05560 -0.47520 1.56940  
H -3.86260 -0.34240 1.71230 C -3.39450 0.73370 -0.24140 O 3.83010 -0.37620 1.04440 H 3.91610 1.47800 0.39230  
H -3.31200 1.35620 1.82990 C -2.37410 -1.51740 -0.70750 C 1.43690 -1.30780 -0.10040 H 3.69860 0.71920 -1.18390  
H -3.61150 -0.33620 -1.86600 C -1.00880 -0.95520 -0.40730 O 2.45600 -2.22230 -0.08830 H 2.61720 -1.68130 -1.22570  
H -3.32060 -1.94160 -0.14910 C -0.80480 0.41160 -0.14450 C 0.16910 -1.83060 -0.31420 H 2.36010 -2.48410 0.31630  
H 0.03070 -2.88710 0.18240 C 0.50120 0.90020 0.16610 C -2.01650 1.25360 -0.14530 H -0.18520 2.89260 0.80250  
33 C 0.69150 2.36740 0.48760 H -1.98770 2.44050 0.17170 O -0.78360 2.92580 -0.89230  
02-Compound23-RR\_miniMM3\_20 C 1.61380 0.00380 0.14840 H 3.05410 1.48940 0.95130 H -1.86650 2.68230 0.48660  
O 4.69330 -1.08260 -0.05920 C 3.03720 0.49860 0.38930 H -4.30660 -0.24460 1.59940 H -4.75010 0.92030 1.39020  
C 3.39750 -0.55590 -0.33920 C 3.61440 1.17440 -0.85040 H -4.39890 -1.21330 -0.47810 H -3.70430 -0.41130 1.85610  
C 3.23150 0.81720 0.30190 O 3.91430 -0.58270 0.74530 H -3.36720 0.68930 -1.68570 H -3.12260 1.25620 2.02160  
C 2.32240 2.70040 0.19330 C 1.36290 -1.34740 -0.15150 H -4.13420 1.25570 -0.18550 H -3.84020 -0.16410 -1.72390  
C 0.93450 -0.91220 0.10110 O 2.35090 -2.29300 -0.19300 H -2.33470 -2.60150 -0.02250 H -3.28800 -1.83000 -0.26240  
C 0.69870 0.47220 0.01090 C 0.08520 -1.82080 -0.42300 H -2.38990 -1.83960 -1.62710 H 0.01480 -2.89400 -0.51220  
C -0.63820 0.94430 -0.04920 C -1.99920 1.32120 -0.24030 H 1.74490 2.76100 -0.03140 33  
C -0.90610 2.43570 -0.05190 O -1.86430 2.53660 -0.37040 H 0.16230 2.94640 -0.69040 01-Compound23-RS\_miniMMFF\_10  
C -1.72260 0.02980 -0.07770 H 3.05600 1.17030 1.25180 H 0.38190 2.80120 1.08940 O 4.63470 -1.06240 0.43640  
C -3.16040 0.50780 -0.18850 H -2.48320 -0.91250 1.75530 H 4.79310 1.24410 -0.79710 C 3.31000 -0.54180 0.51290  
C -3.83170 0.62700 1.18140 H -4.43710 -1.12740 -0.28020 H 3.88730 -0.03350 -1.59140 C 3.28120 0.82490 -0.14140  
O -3.90190 -0.43400 -0.95160 H -3.81200 0.93070 -1.23630 H 3.25030 1.62210 -1.59520 C 2.34360 -1.47250 -0.20720  
C -1.45110 -1.34580 0.00650 H -3.98320 1.28110 0.50370 H 3.49790 -0.34730 1.96240 C 0.94730 -0.91720 -0.15490  
O -2.41910 -2.30380 0.00870 H -2.41190 -2.57150 -0.40630 H 3.26630 -1.76280 0.22030 C 0.69930 0.47000 -0.13460  
C -0.14180 -1.79900 0.10130 H -2.54430 -1.46290 -1.78930 H 0.06120 -2.90400 -0.45840 C -0.63620 0.95940 -0.03100  
C 1.86880 1.40050 -0.02570 H 0.60110 2.96700 -0.42370 33 C -0.89220 2.44400 0.10940  
O 1.76410 2.56760 -0.32860 H -0.04110 2.69360 1.23350 C 0.16390 -1.08020 0.52860 C -1.72450 0.03990 -0.07180  
H -3.21110 1.48790 -0.71050 H 1.66120 2.60060 0.92860 O 4.63490 -1.08020 0.52860 C -3.16930 0.51150 -0.02230  
H 4.82820 -1.14560 0.87840 H 4.63790 1.51490 -0.65850 C 3.31350 -0.54380 0.55760 C -3.70150 0.54130 1.40560  
H 3.28480 -0.45730 -1.44330 H 3.67120 0.47030 -1.68880 C 3.28750 0.81020 -0.12110 O -3.99720 -0.38300 -0.78010  
H 3.34490 0.75090 1.40800 H 3.01970 2.03540 -1.16890 C 2.34990 -1.49260 -0.14080 C -1.43130 -1.33500 -0.12550  
H 4.03310 1.49940 -0.06400 H 4.75960 -0.17410 1.00960 C 0.95470 -0.93170 -0.12690 O -2.40670 -2.29530 -0.15010  
H 2.37020 -2.46010 -0.36870 H 3.15680 -1.87280 0.18110 C 0.70430 0.45540 -0.13950 C -0.12660 -1.80910 -0.15540  
H 2.52490 -1.74230 1.26190 H -0.04500 -2.87850 -0.64490 C -0.63560 0.94470 -0.07990 C 1.88440 1.39220 -0.26510  
H -0.72570 2.87880 -1.05650 33 C -0.89140 2.43450 -0.00670 O 1.73950 2.58170 -0.53850  
H -1.94330 2.69790 0.23730 C 4.64110 -1.10970 0.40890 C -1.72390 0.02150 -0.10680 H -3.28830 1.49320 -0.49060  
H -0.27340 2.96950 0.68940 C 3.33240 -0.55190 0.50260 C -3.17140 0.49440 -0.05500 H 4.65720 -1.89750 0.93590  
H -4.88540 0.97370 1.08970 C 3.28340 0.77370 -0.22630 O -3.64840 0.68200 1.38160 H 3.04190 -0.45260 1.57340  
H -3.84990 -0.34350 1.72540 C 2.33880 -1.51350 -0.13160 C -0.40470 -0.46080 -0.68470 H 3.88920 1.51950 0.45010  
H -3.30340 1.35710 1.83420 C 0.94730 -0.93990 -0.11820 C 1.42410 -1.35210 -0.13940 H 3.72440 0.78410 -1.14390  
H -3.62170 -0.34590 -1.85470 C 0.70070 0.44800 -0.14660 O -2.39640 -2.31410 -0.18120 H 2.64480 -1.61690 -1.25250  
H -3.31340 -1.94820 -0.13910 C -0.64050 0.94010 -0.10530 C -0.11840 -1.82420 -0.13570 H 2.38590 -2.46130 0.26670  
H 0.04050 -2.88470 0.17190 C -0.89320 2.43200 -0.06540 C 1.89210 1.37850 -0.25280 H -0.18800 2.89510 0.81590  
33 C -0.89320 2.43200 -0.06540 O 1.75780 2.57010 -0.52250 H -0.82080 2.93510 -0.86560  
01-Compound23-RS\_miniMMFF\_1 C -1.73120 0.01790 -0.11500 H -3.28640 1.41560 -0.63430 H -1.87340 2.66890 0.53360  
O -3.32680 -0.91140 1.46770 C -3.17870 0.49360 -0.07160 H 4.92190 -1.15430 -0.39820 H -4.74570 0.87250 1.41390  
C -3.45250 -0.73260 0.05610 C -3.64290 0.74490 1.35940 H 3.03050 -0.43560 1.61200 H -3.68830 -0.45740 1.85720  
C -3.38970 0.74560 -0.27010 O -4.05750 -0.48440 -0.65150 H 3.89850 1.51300 0.45780 H -3.11870 1.21210 2.04440  
C -2.37860 -1.50720 -0.69850 C -1.43340 -1.35630 -0.12300 H 3.72870 0.75240 -1.12350 H -3.86230 -0.14170 -1.71640  
C -1.00940 -0.95340 -0.40620 O -2.40570 -2.31920 -0.14270 H 2.66180 -1.67300 -1.17740 H -3.26690 -1.84240 -0.28700  
C -0.80260 0.41130 -0.13450 C -0.12850 -1.82960 -0.11510 H 2.38360 -2.46510 0.36650 H 0.04150 -2.88360 -0.19080  
C 0.50290 0.89460 0.18280 C 1.89430 1.36870 -0.24120 H -0.24680 2.89870 0.74700 33  
C 0.69130 2.35670 0.52610 O 1.77160 2.58240 -0.38840 H -0.72730 2.89420 -0.98610  
C 1.61510 -0.00170 0.15200 H -3.29750 1.38780 -0.69080 H -1.90460 2.68770 0.31010  
C 3.03760 0.49110 0.39780 H 5.25850 -0.49700 0.84620 H -4.68680 1.03080 1.39560 C 3.40850 -0.77170 0.27290  
C 3.60970 1.19390 -0.82940 H 3.90680 -0.41550 1.56560 H -3.63150 -0.26820 1.92840 C 3.41660 0.65080 -0.24970  
O 3.92020 -0.59460 0.72770 H 3.96060 1.47970 0.26930 H -3.03410 1.40100 1.93150 C 2.36830 -1.61800 -0.45190  
C 1.36270 -1.34960 -0.16310 H 3.63160 0.67110 -1.26100 H -4.90710 -0.02270 -0.77650 C 0.99940 -1.00080 -0.34080  
O 2.35100 -2.29470 -0.21950 H 2.62740 -1.74420 -1.16530 H -3.22870 -1.85480 -0.43110 C 0.81920 0.39280 -0.26530  
C 0.08370 -1.82020 -0.43430 H 2.37070 -2.46350 0.41710 H 0.05130 -2.89890 -0.15080  
C -1.99130 1.32710 -0.24920 H -1.92840 2.69970 0.15090 33  
O -1.84740 2.53960 -0.40240 H -0.31410 2.89450 0.74070 01-Compound23-RS\_miniMMFF\_8  
H 3.05760 1.14540 1.27360 H -0.64000 2.88350 -1.02980 C -3.64330 -0.85600 1.30690 C -3.03470 0.62090 0.03620  
H -3.30980 -1.86670 1.65320 H -4.68130 1.09370 1.36760 C -3.48140 -0.76430 -0.10910 C -3.43330 0.72450 1.50480  
H -4.44120 -1.11810 -0.21780 H -3.61980 -0.18010 1.94760 C -3.33730 0.67690 -0.55110 O -3.98250 -0.24030 -0.61570  
H -3.78650 0.91510 -1.27820 H -3.02440 1.48800 1.87150 C -2.31330 -1.61620 -0.58330 C -1.39520 -1.30290 -0.25170  
H -3.99220 1.31310 0.44830 H -4.92460 -0.04910 -0.74950 C -0.96870 -0.48210 -0.32470 O -2.41910 -2.21010 -0.29910  
H -2.41980 -2.56000 -0.39340 H -3.24100 -1.86370 -0.38950 C -0.78870 0.40450 -0.15350 C -0.11720 -1.83850 -0.34370  
H -2.55680 -1.45800 -1.77920 H 0.04020 -2.90490 -0.11720 C 0.52410 0.94540 0.00830 C 2.03930 1.25850 -0.41500  
H 0.63520 2.96680 -0.38080 33 C 0.72200 2.44370 0.09570 O 1.94160 2.43960 -0.74660  
02-Compound23-RR\_miniMMFF\_11 H -0.06350 2.68150 1.25010 H -3.12560 1.58850 -0.46720  
H 1.64660 2.57550 1.00490 O 4.65030 -1.04430 0.44420 C 3.11980 -1.67820 1.99080  
H 4.63360 1.53080 -0.63410 C 3.32420 -0.52640 0.51660 C 4.40200 -1.21160 0.12860 H 3.98120 1.29700 0.43220  
H 3.66370 0.50790 -1.68290 C 3.28500 0.82130 -0.17320 O 3.82580 -0.38950 1.02710 H 3.89250 0.67500 -1.23710  
H 3.01360 2.06110 -1.12740 C 2.35670 -1.47650 -0.17380 C 3.82580 -0.38950 1.02710 H 2.62600 -1.71880 -1.51290  
H 4.76080 -0.18720 1.00780 C 0.95950 -0.92130 -0.14650 O 2.42890 -2.23250 -0.06880 H 2.35360 -2.62080 -0.00720  
H 3.15720 -1.87600 0.15560 C 0.70280 0.46500 -0.15250 C 0.14760 -1.82380 -0.31280 H -0.58890 2.93890 -0.90080  
H -0.04790 -2.87530 -0.66460 C -0.64050 0.94650 -0.08890 C -2.01800 1.27360 -0.12280 H -1.61050 2.71120 0.52330  
33 C -0.90390 2.43530 -0.01690 H -1.96930 2.44990 0.22660 H 0.09620 2.83720 0.75660  
01-Compound23-RS\_miniMMFF\_2 C -1.72420 0.01710 -0.10930 H 3.06040 1.48400 0.93090 H -4.44880 1.12530 1.59620  
O -3.44450 -0.86880 1.40870 C -3.17440 0.48210 -0.05000 H -2.81530 -0.59160 1.74460 H -3.44420 -0.26330 1.98000  
C -3.46670 0.76630 -0.01480 C -3.63940 0.68520 1.38830 H -4.40510 -1.17270 -0.53460 H -2.75490 1.36720 2.07360  
C -3.36880 0.67830 -0.45140 O -4.04530 -0.48520 -0.65920 H -3.40940 0.76720 -1.64050 H -4.82430 0.25140 -0.64130  
C -2.33950 -1.59300 -0.61630 C -1.41710 -1.35460 -0.14400 H -4.13590 1.27660 -0.09860 H -3.23490 -1.69290 -0.48200  
C -0.98430 -0.98880 -0.34910 O -2.38350 -2.32310 -0.17660 H -2.35700 -2.59110 -0.08190 H -0.00530 -2.91710 -0.42920  
C -0.79420 0.38810 -0.12720 C -0.10900 -1.81940 -0.15130 H -2.39820 -1.78350 -1.66440 33  
C 0.51470 0.89820 0.14620 C 1.88810 1.39490 -0.25410 H 0.15580 2.95360 -0.69060  
C 0.69840 2.37670 0.41520 O 1.74730 2.59780 -0.46370 H 0.42200 2.80850 1.08280 02-Compound23-RR\_miniMMFF\_12  
C 1.63620 0.01120 0.14760 H -3.29960 1.39460 -0.64060 H 1.75410 2.75510 -0.07580 O 3.26600 -0.72400 1.64560  
C 3.05580 0.52280 0.37010 H 4.67720 -1.86950 0.95970 H 4.78580 1.21550 -0.88280 C 3.42480 -0.79640 0.22860  
C 3.63140 1.15040 -0.89570 H 3.06250 -0.41120 1.57620 H 3.86650 -0.06200 -1.60700 C 3.40820 0.58740 -0.38370  
O 3.93980 -0.53810 0.76960 H 3.92020 1.52450 0.37860 H 3.24010 1.59740 -1.61830 C 2.33790 -1.67520 -0.37580  
C 1.39710 -1.34940 -0.11320 H 3.69080 0.75410 -1.18990 H 3.59000 -0.27550 1.96750 C 0.97940 -1.02820 -0.28990  
O 2.39620 -2.28440 -0.14150 H 2.66090 -1.65610 -1.21290 H 3.24030 -1.77700 0.24470 C 0.80930 0.36860 -0.25970  
C 0.12190 -1.84190 -0.35680 H 2.39670 -2.44940 0.33250 H 0.03490 -2.89670 -0.46010  
C -2.00140 1.28670 -0.22960 H -0.28590 2.89600 0.76090 33  
O -1.90370 2.51280 -0.21290 H -0.70900 2.90050 -0.98800 01-Compound23-RS\_miniMMFF\_9  
H 3.06920 1.22850 1.20540 H -1.92780 2.68670 0.26410 O 4.61890 -1.13250 0.41730 C -3.04990 0.62710 0.01160

C -3.45030 0.79060 1.47440  
O -4.00230 -0.25270 -0.60840  
C -1.42030 -1.31280 -0.20700  
O -2.44870 -2.21560 -0.23350  
C -0.14500 -1.85720 -0.27280  
C 2.03650 1.22540 -0.42300  
O 1.95470 2.42830 -0.66850  
H -3.13570 1.57370 -0.53060  
H 4.01170 -0.21420 2.00840  
H 4.39960 -1.26460 0.04950  
H 4.06200 1.25350 0.19130  
H 3.77160 0.54380 -1.41700  
H 2.55860 -1.87920 -1.43040  
H 2.31830 -2.63150 0.16190  
H -0.53320 2.90870 -0.97050  
H -1.63640 2.72840 0.39420  
H 0.05440 2.83620 0.72760  
H -3.46620 -0.17780 1.98800  
H -2.76980 1.45220 2.01860  
H -4.46410 1.19910 1.54820  
H -8.4460 0.23730 -0.64190  
H -3.26160 -1.70000 -0.43080  
H -0.03740 -2.93880 -0.31860  
33  
02-Compound23-RR\_miniMMFF\_13  
O 3.25110 -0.84680 1.68130  
C 3.41630 -0.78930 0.26270  
C 3.41720 0.64790 -0.22030  
C 2.36760 -1.62770 -0.45670  
C 1.00090 -1.00430 -0.33860  
C 0.82090 0.38980 -0.27430  
C -0.48490 0.94250 -0.11730  
C -0.65710 2.43810 0.03610  
C -1.61940 0.07780 -0.12640  
C -3.03510 0.62020 0.02360  
C -3.43350 0.74940 1.49020  
O -3.98120 -0.25370 -0.61280  
C -1.39380 -1.30560 -0.23690  
O -2.41640 -2.21420 -0.26750  
C -0.11590 -1.84150 -0.32710  
C 2.04300 1.25370 -0.41060  
O 1.94910 2.43780 -0.72900  
H -3.12750 1.57820 -0.49740  
H 2.31510 -0.69960 1.90330  
H 4.40500 -1.22130 0.06920  
H 3.96140 1.28120 0.48960  
H 3.91560 0.70030 -1.19570  
H 2.61720 -1.72430 -1.52000  
H 2.35260 -2.63130 -0.01420  
H -0.56820 2.92990 -0.93730  
H -1.62030 2.71990 0.46580  
H 0.08130 2.84320 0.73590  
H -4.44990 1.14960 1.57470  
H -3.44230 -0.23000 1.98290  
H -2.75630 1.40340 2.04730  
H -4.82470 0.23450 -0.64640  
H -3.23390 -1.70330 -0.46000  
H -0.00370 -2.92150 -0.40190  
33  
02-Compound23-RR\_miniMMFF\_14  
O 3.17840 -0.78690 1.65920  
C 3.40160 -0.78070 0.24820  
C 3.41050 0.65080 -0.25130  
C 2.35230 -1.61350 -0.48080  
C 0.98610 -0.99450 -0.34540  
C 0.81420 0.39840 -0.24560  
C -0.48330 0.95340 -0.05260  
C -0.64580 2.43970 0.17560  
C -1.62150 0.09810 -0.08730  
C -3.03170 0.64510 0.06130  
C -3.50070 0.60580 1.51090  
O -3.94080 -0.14720 -0.71670  
C -1.40890 -1.28540 -0.22900  
O -2.43830 -2.18790 -0.26280  
C -0.13490 -1.82700 -0.34330  
C 2.03320 1.25970 -0.41120  
O 1.93020 2.43690 -0.75500  
H -3.11220 1.66260 -0.33300  
H 3.13580 -1.71270 1.95630  
H 4.39270 -1.22090 0.08950  
H 3.97350 1.28740 0.44080  
H 3.88770 0.68910 -1.23770  
H 2.59920 -1.69720 -1.54570  
H 2.33950 -2.62310 -0.05210  
H -0.65860 2.97080 -0.78070  
H -1.56190 2.68270 0.71940  
H 0.15450 2.82970 0.81300  
H -4.52200 0.99410 1.58930  
H -3.52800 -0.42080 1.89430  
H -2.85250 1.19700 2.16520  
H -3.80600 0.12860 -1.64350  
H -3.27570 -1.68030 -0.33030  
H -0.02870 -2.90520 -0.43930  
33  
02-Compound23-RR\_miniMMFF\_15  
O 4.68990 -1.08790 0.04490  
C 3.40740 -0.56290 -0.28900  
C 3.23110 0.80520 0.33490  
C 2.33380 -1.50420 0.23970  
C 0.94650 -0.93320 0.09530  
C 0.69400 0.45070 -0.00650  
C -0.64680 0.93660 -0.08830  
C -0.90300 2.42720 -0.14410  
C -1.73130 0.00890 -0.12100  
C -3.17910 0.47680 -0.20700  
C -3.74700 0.79920 1.17130  
O -4.00910 -0.53740 -0.79670  
C -1.43060 -1.36100 -0.01880  
O -2.39850 -2.32850 -0.03950  
C -0.12800 -1.82520 0.10610  
C 1.88480 1.37480 -0.03550  
O 1.78890 2.56240 -0.33090  
H -3.25530 1.33680 -0.87920  
H 5.36170 -0.50280 -0.34760  
H 3.33980 -0.49870 -1.38250  
H 3.32570 0.77610 1.42650  
H 4.01580 1.47750 -0.03210  
H 2.41230 -2.45910 -0.29610  
H 2.51590 -1.73040 1.29860  
H -0.37000 2.93650 0.66560  
H -0.59620 2.82600 -1.11600  
H -1.94930 2.70050 -0.00040  
H -4.78420 1.14110 1.08560  
H -3.76450 -0.09370 1.80740  
H -3.16950 1.57190 1.68730  
H -4.86870 -0.11490 -0.97980  
H -3.21410 -1.89610 -0.37670  
H 0.04150 -2.89660 0.19510  
33  
02-Compound23-RR\_miniMMFF\_16  
O 3.24710 -0.77320 1.63160  
C 3.41240 -0.80560 0.21380  
C 3.40400 0.59700 -0.35700  
C 2.32490 -1.66450 -0.41960  
C 0.96770 -1.01940 -0.30380  
C 0.80570 0.37680 -0.24210  
C -0.49110 0.94380 -0.06640  
C -0.64760 2.43560 0.12850  
C -1.63550 0.09510 -0.08530  
C -3.04350 0.65360 0.04120  
C -3.51990 0.65830 1.48890  
O -3.95460 -0.15320 -0.71940  
C -1.43170 -1.29250 -0.18960  
O -2.46620 -2.18950 -0.20500  
C -0.16050 -1.84320 -0.28290  
C 2.03050 1.22900 -0.42460  
O 1.94050 2.42240 -0.71090  
H -3.11650 1.65930 -0.38310  
H 3.99980 -0.28840 2.01370  
H 4.38680 -1.27120 0.02590  
H 4.03580 1.25180 0.25410  
H 3.79730 0.58170 -1.38020  
H 2.54190 -1.83100 -1.48150  
H 2.30730 -2.63910 0.08410  
H -0.62250 2.94920 -0.83720  
H -1.57880 2.70040 0.63480  
H 0.13350 2.82830 0.78760  
H -4.53940 1.05450 1.55100  
H -3.55490 -0.35670 1.90120  
H -2.87160 1.26430 2.12930  
H -3.78440 0.06570 -1.65550  
H -3.30190 -1.68040 -0.27650  
H -0.05860 -2.92470 -0.34490  
33  
02-Compound23-RR\_miniMMFF\_17  
O 4.71030 -1.01680 0.03920  
C 3.41270 -0.52780 -0.29140  
C 3.23310 0.84500 0.32130  
C 2.34970 -1.47090 0.25450  
C 0.95860 -0.91420 0.10420  
C 0.69460 0.46710 -0.00510  
C -0.65120 0.93930 -0.09350  
C -0.92210 2.42720 -0.15870  
C -1.72730 0.00130 -0.12260  
C -3.17920 0.45530 -0.21340  
C -3.75020 0.78700 1.16150  
O -4.00050 -0.57250 -0.79210  
C -1.41410 -1.36500 -0.01220  
O -2.37190 -2.34230 -0.02920  
C -0.10750 -1.81610 0.11780  
C 1.87740 1.40360 -0.03360  
O 1.76300 2.59350 -0.31360  
H -3.26310 1.30720 -0.89500  
H 4.84400 -1.85370 -0.43940  
H 3.34130 -0.46140 -1.38450  
H 3.34280 0.82680 1.41190  
H 4.00840 1.51850 -0.06310  
H 2.43530 -2.43270 -0.26750  
H 2.53710 -1.68010 1.31590  
H -0.60410 2.82600 -1.12710  
H -1.97310 2.69110 -0.03420  
H -0.40760 2.94430 0.65800  
H -4.79050 1.11850 1.07230  
H -3.75960 -0.09920 1.80690  
H -3.17990 1.57050 1.66930  
H -4.86330 -0.15870 -0.98010  
H -3.19310 -1.91870 -0.36450  
H 0.07010 -2.88550 0.21390  
33  
02-Compound23-RR\_miniMMFF\_18  
O 3.25230 -0.88340 1.65830  
C 3.40840 -0.79800 0.24010  
C 3.41080 0.64950 -0.21320  
C 2.35230 -1.62090 -0.48820  
C 0.98790 -0.99720 -0.34520  
C 0.81600 0.39620 -0.25600  
C -0.48200 0.95300 -0.06800  
C -0.64670 2.44230 0.14130  
C -1.62020 0.09700 -0.09210  
C -3.03160 0.64430 0.04940  
C -3.49580 0.63130 1.50120  
O -3.94170 -0.16510 -0.70910  
C -1.40670 -1.28780 -0.21680  
O -2.43460 -2.19150 -0.23450  
C -0.13270 -1.82940 -0.32920  
C 2.03710 1.25530 -0.40820  
O 1.93880 2.43370 -0.74550  
H -3.11480 1.65390 -0.36420  
H 2.31930 -0.73370 1.89100  
H 4.39450 -1.22850 0.03190  
H 3.94620 1.27110 0.51330  
H 3.91850 0.72060 -1.18290  
H 2.59290 -1.69610 -1.55520  
H 2.33910 -2.63320 -0.06620  
H -0.64170 2.96300 -0.82090  
H -1.57160 2.69440 0.66540  
H 0.14290 2.83720 0.78900  
H -4.51770 1.01910 1.57550  
H -3.51980 -0.38800 1.90360  
H -2.84690 1.23580 2.14230  
H -3.84010 0.11800 -1.63790  
H -3.27340 -1.68750 -0.31440  
H -0.02620 -2.90920 -0.41520  
33  
02-Compound23-RR\_miniMMFF\_19  
O 4.67840 -1.09740 0.05350  
C 3.40130 -0.56520 -0.28910  
C 3.22100 0.79710 0.34820  
C 2.31880 -1.51250 0.21360  
C 0.93290 -0.93170 0.09050  
C 0.68870 0.45500 0.01030  
C -0.64710 0.95340 -0.03420  
C -0.89920 2.44510 -0.02780  
C -1.73550 0.03520 -0.08690  
C -3.17650 0.51000 -0.18760  
C -3.81430 0.66750 1.18760  
O -3.95270 -0.44660 -0.92390  
C -1.44910 -1.33930 0.00090  
O -2.42710 -2.29740 -0.01010  
C -0.14880 -1.81550 0.10640  
C 1.88370 1.36760 -0.04860  
O 1.79570 2.53910 -0.40400  
H -3.25230 1.44580 -0.74950  
H 5.35660 -0.50790 -0.32160  
H 3.34690 -0.48770 -1.38240  
H 3.29200 0.75610 1.44110  
H 4.01450 1.47170 0.00560  
H 2.38980 -2.45290 -0.34840  
H 2.50150 -1.76920 1.26560  
H -0.27150 2.94110 0.71970  
H -0.71240 2.86480 -1.02080  
H -1.91840 2.70710 0.26400  
H -4.85360 0.99890 1.08750  
H -3.84260 -0.28700 1.72580  
H -3.27630 1.39200 1.80660  
H -3.72420 -0.30900 -1.86300  
H -3.27410 -1.85760 -0.23940  
H 0.01380 -2.88900 0.18530  
33  
02-Compound23-RR\_miniMMFF\_20  
O 4.69890 -1.07530 -0.11230  
C 3.39110 -0.56110 -0.35660  
C 3.25920 0.82730 0.23130  
C 2.34710 -1.48080 0.25820  
C 0.95750 -0.92160 0.11030  
C 0.69760 0.45920 -0.01310  
C -0.64840 0.92930 -0.13230  
C -0.91540 2.41540 -0.24600  
C -1.72760 -0.00760 -0.13730  
C -3.17970 0.44780 -0.23580  
C -3.72700 0.87410 1.12260  
O -4.01990 -0.60670 -0.73360  
C -1.41630 -1.37130 0.00340  
O -2.37340 -2.34920 0.01590  
C -0.10980 -1.82170 0.13560  
C 1.88110 1.39950 -0.00250  
O 1.75390 2.61470 -0.12570  
H -3.26880 1.25220 -0.97180  
H 4.86170 -1.07280 0.84700  
H 3.25480 -0.51950 -1.44440  
H 3.46600 0.83240 1.30800  
H 4.00000 1.48650 -0.23740  
H 2.42110 -2.46430 -0.22320  
H 2.55730 -1.64290 1.32340  
H -0.47090 2.80890 -1.16580  
H -1.97280 2.67900 -0.28290  
H -0.51810 2.93800 0.63030  
H -4.76830 1.20140 1.02870  
H -3.72630 0.03360 1.82650  
H -3.14770 1.68910 1.56650  
H -4.88510 -0.19950 -0.92510  
H -3.20220 -1.93060 -0.30640  
H 0.06700 -2.89020 0.24490

## 4. Electronic Circular Dichroism

### 4.1. Computational details

Time-Dependent Density Functional Theory calculations were undertaken to predict ECD spectra for compound **21**. A conformational search was done with the Mixed Torsional/Low Mode Sampling protocol in gas phase using the MMFF force field, 21 kJ/mol and MAD 0.5 Å as energy cutoff and geometric criteria respectively. Only one conformer was found under these conditions due to the rigidity of the molecule. Afterwards, structures of both enantiomers (9*R* and 9*S*) were optimized at the PCM/B3LYP/6-31G(d) level of theory and subsequently submitted to TDDFT/ECD calculations at B3LYP/6-31G(d) as described in the manuscript and at  $\omega$ B97XD (figure S76). Calculations for the 9*S* enantiomer, at both levels of theory, matched better than the opposite enantiomer.

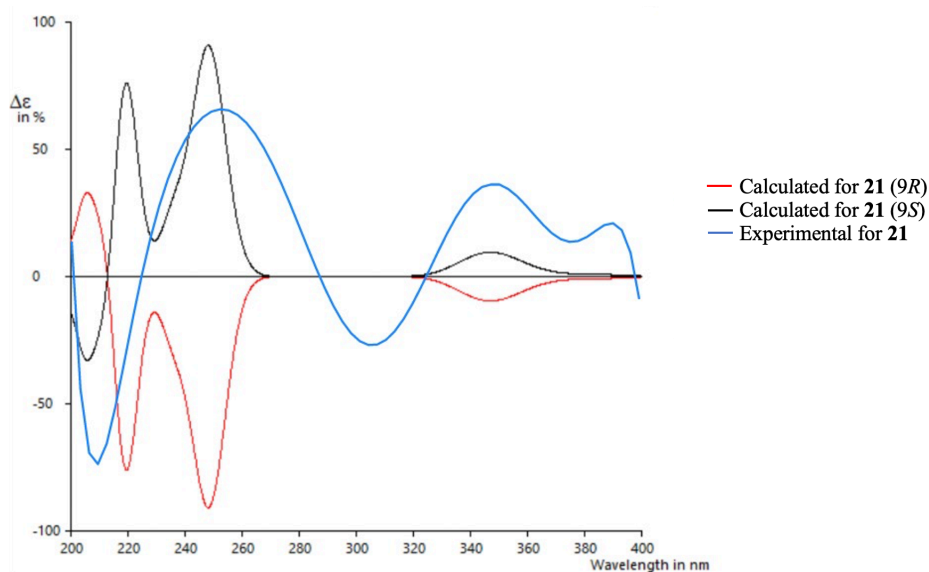

**Figure S76.** Experimental and calculated ECD spectra for compound **21** at  $\omega$ B97XD.

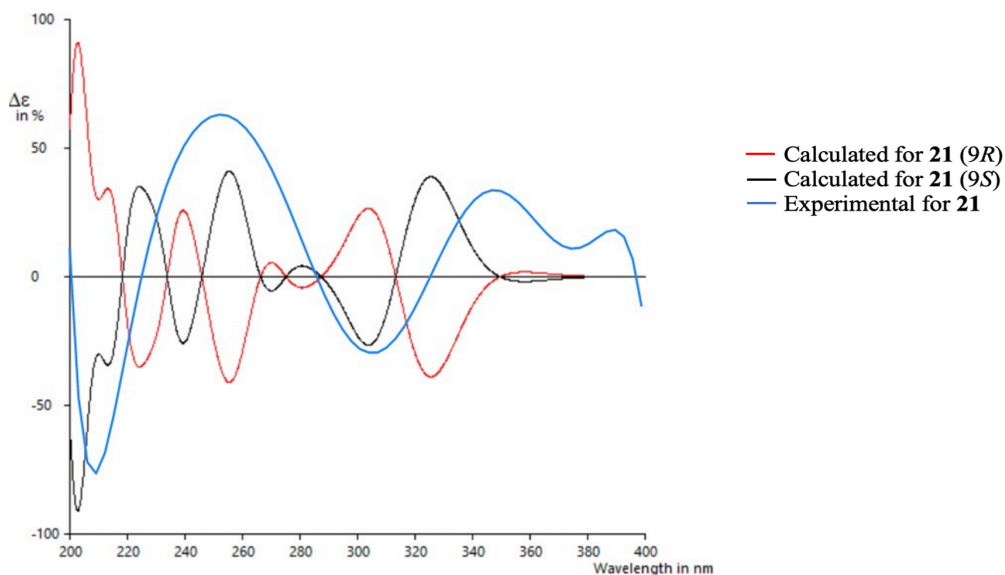

**Figure S77.** Experimental and calculated ECD spectra for compound **21** at B3LYP/6-31G(d).
